# Supplementary material
Source: ML conference proceedings conference paper supplement (https://aclanthology.org/2024.emnlp-main.534)

Context position

7  
6  
5  
4  
3  
2  
1  
0Shop-V...  
Craftsm...  
Ridgid  
Stanley  
Karcher  
DeWalt  
Makita  
Vacmas...

Product name

Average ranking score

8  
7  
6  
5  
4  
3  
2  
1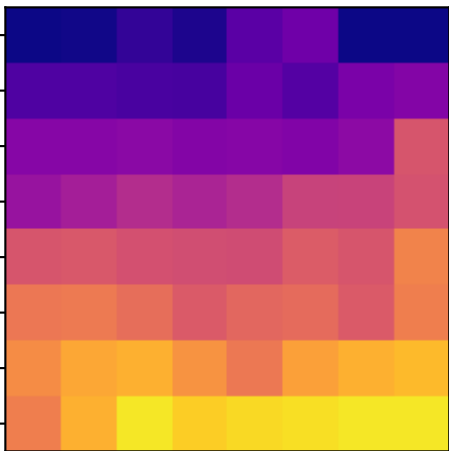

Supplement: software [file 2024.emnlp-main.534.software.zip]
