# Supplementary material
Source: ML conference proceedings conference paper supplement (https://aclanthology.org/2024.emnlp-main.534)

Document

Friedrich  
Whynter  
Midea  
Danby  
SereneL...  
BlackDe...  
Hisense  
Frigidaire

Frigidaire  
Hisense  
BlackDe...  
SereneL...  
Danby  
Midea  
Whynter  
Friedrich

Product name

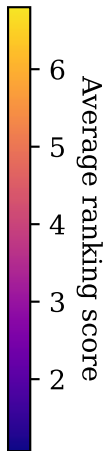

Supplement: software [file 2024.emnlp-main.534.software.zip]
