# Supplementary material
Source: ML conference proceedings conference paper supplement (https://aclanthology.org/2024.emnlp-main.534)

Context position

0  
1  
2  
3  
4  
5  
6  
7

Ubiquiti  
Synology  
Google  
Cisco  
D-Link  
Linksys  
TP-Link  
Netgear

Product name

Average ranking score

8  
7  
6  
5  
4  
3  
2  
1

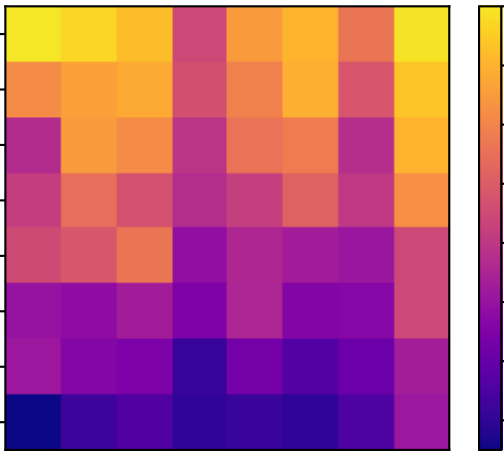

Supplement: software [file 2024.emnlp-main.534.software.zip]
