# Supplementary material
Source: ML conference proceedings conference paper supplement (https://aclanthology.org/2024.emnlp-main.534)

Context position

7  
6  
5  
4  
3  
2  
1  
0

TP-Link  
Cisco  
D-Link  
Google  
Linksys  
Synology  
Ubiquiti  
Netgear

Product name

Average ranking score

7  
6  
5  
4  
3  
2

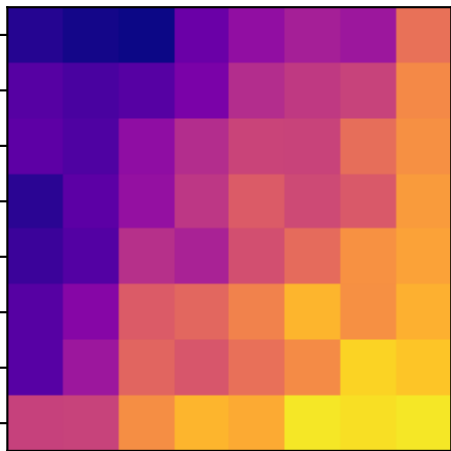

Supplement: software [file 2024.emnlp-main.534.software.zip]
