# Supplementary material
Source: ML conference proceedings conference paper supplement (https://aclanthology.org/2024.emnlp-main.534)

**BlackDecker**

Craftsman

DeWalt

Honda

Husqvarna

Makita

RedMax

Toro

0 1 2 3 4 5 6 7 8

Ranking score

Natural  
Adversarial

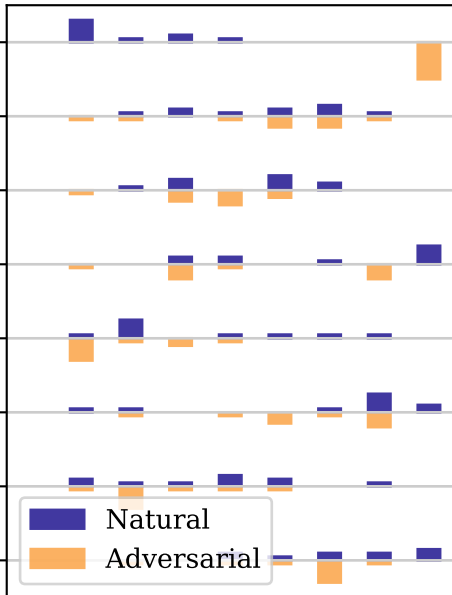

Supplement: software [file 2024.emnlp-main.534.software.zip]
