# Supplementary material
Source: ML conference proceedings conference paper supplement (https://aclanthology.org/2024.emnlp-main.534)

Context position

0  
1  
2  
3  
4  
5  
6  
7

Holman  
Hozelock  
Weathe...  
Claber  
Gardena  
Raindrip  
Orbit  
Rain Bird

Document

Average ranking score

8  
7  
6  
5  
4  
3  
2  
1

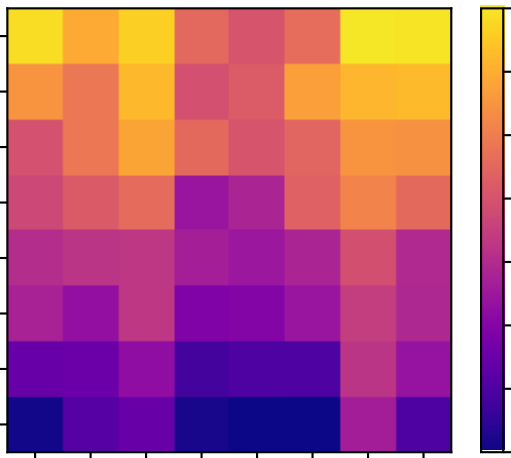

Supplement: software [file 2024.emnlp-main.534.software.zip]
