# Supplementary material
Source: ML conference proceedings conference paper supplement (https://aclanthology.org/2024.emnlp-main.534)

Context position

2  
0  
1  
3  
5  
6  
4  
7

Tefal  
Smeg  
Oster  
KitchenA...  
Breville  
Hamilton...  
Blendtec  
Ninja

Document

Average ranking score

7  
6  
5  
4  
3  
2

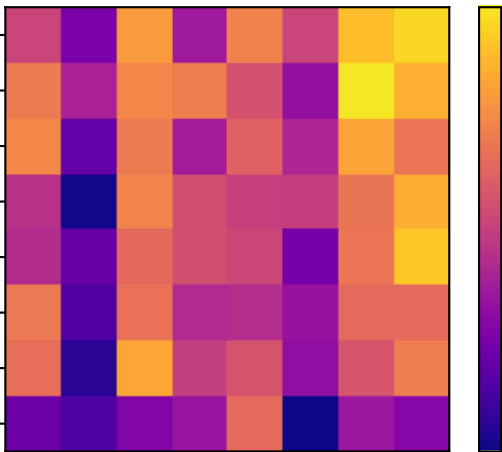

Supplement: software [file 2024.emnlp-main.534.software.zip]
