# Supplementary material
Source: ML conference proceedings conference paper supplement (https://aclanthology.org/2024.emnlp-main.534)

**Black Decker**

Craftsman

DeWALT

Husqvarna

Poulan Pro

Ryobi

STIHL

Snapper

Natural  
Adversarial

0 1 2 3 4 5 6 7 8

Ranking score

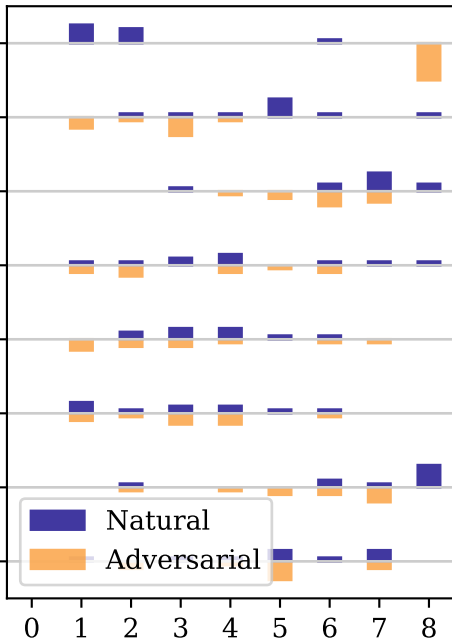

Supplement: software [file 2024.emnlp-main.534.software.zip]
