# Supplementary material
Source: ML conference proceedings conference paper supplement (https://aclanthology.org/2024.emnlp-main.534)

Context position

0  
1  
3  
2  
4  
5  
6  
7

Bissell  
Miele  
Ilife  
Samsung  
Xiaomi  
Eufy  
Ecovacs  
Shark

Document

Average ranking score

7  
6  
5  
4  
3  
2  
1

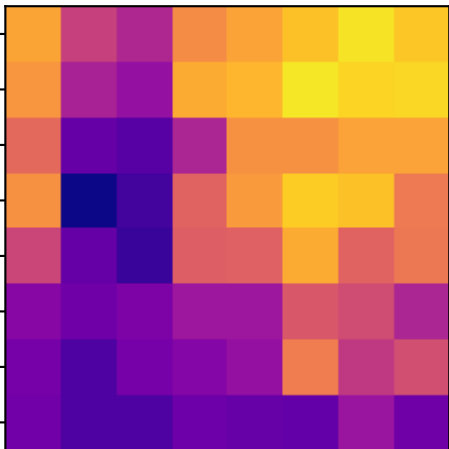

Supplement: software [file 2024.emnlp-main.534.software.zip]
