# Supplementary material
Source: ML conference proceedings conference paper supplement (https://aclanthology.org/2024.emnlp-main.534)

Product name

Ninja

Blendtec

Hamilton...

Breville

KitchenA...

Oster

Smeg

Tefal

1

4

6

5

3

1

0

2

Context position

Average ranking score

7

6

5

4

3

2

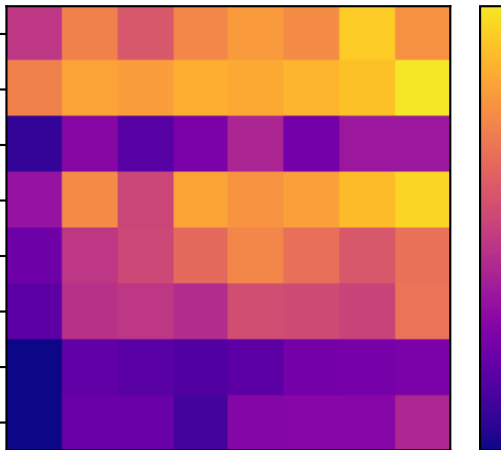

Supplement: software [file 2024.emnlp-main.534.software.zip]
