# Supplementary material
Source: ML conference proceedings conference paper supplement (https://aclanthology.org/2024.emnlp-main.534)

Product name

Hamilton...

Breville

KitchenA...

Oster

Smeg

Tefal

Ninja

Blendtec

1

6

5

4

3

2

0

1

Context position

Average ranking score

8  
7  
6  
5  
4  
3  
2  
1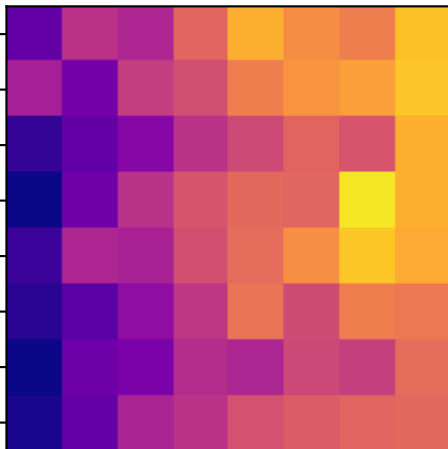

Supplement: software [file 2024.emnlp-main.534.software.zip]
