# Supplementary material
Source: ML conference proceedings conference paper supplement (https://aclanthology.org/2024.emnlp-main.534)

Context position

0  
2  
1  
4  
5  
3  
6  
7

Acheda...  
Yunmai  
Medcur...  
TimTam  
Opove  
Renpho  
Hyperice  
Therabo...

Product name

Average ranking score

8  
7  
6  
5  
4  
3  
2  
1  
0

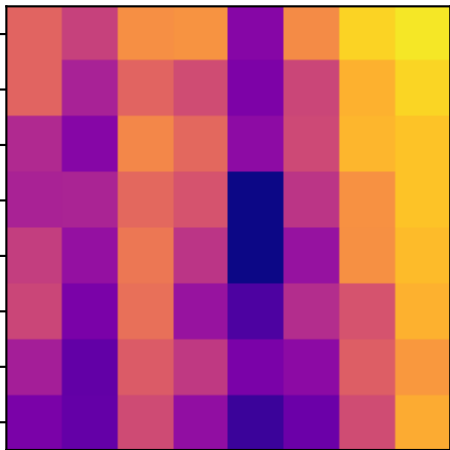

Supplement: software [file 2024.emnlp-main.534.software.zip]
