# Supplementary material
Source: ML conference proceedings conference paper supplement (https://aclanthology.org/2024.emnlp-main.534)

Context position

0  
1  
2  
4  
3  
5  
6  
7

Razer  
Yamaha  
Samsung  
Audio-T...  
Beats  
Bang Ol...  
Bowers...  
Bose

Product name

Average ranking score

8  
7  
6  
5  
4  
3  
2  
1

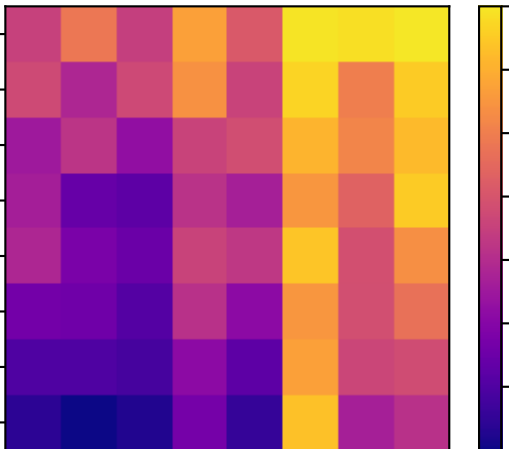

Supplement: software [file 2024.emnlp-main.534.software.zip]
