# Supplementary material
Source: ML conference proceedings conference paper supplement (https://aclanthology.org/2024.emnlp-main.534)

Context position

7  
6  
5  
4  
3  
2  
1  
0

Garnier  
Herbal E...  
Dove  
Matrix  
Paul Mit...  
Pantene  
Redken  
L'Oréal

Product name

Average ranking score

8  
7  
6  
5  
4  
3  
2

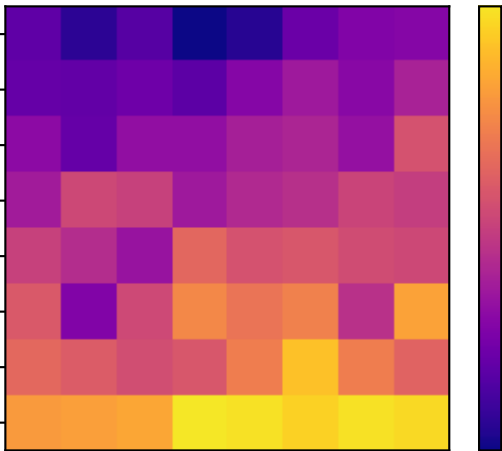

Supplement: software [file 2024.emnlp-main.534.software.zip]
