# Supplementary material
Source: ML conference proceedings conference paper supplement (https://aclanthology.org/2024.emnlp-main.534)
Supplement: software [file 2024.emnlp-main.534.software.zip]

Product name

Apple  
Acer  
Samsung  
Huawei  
LG  
Google  
CHUWI  
Alcatel

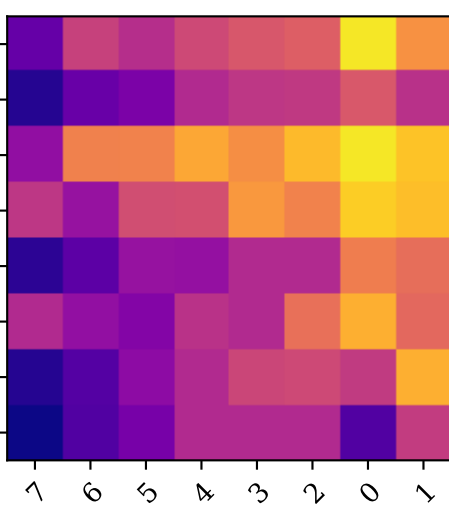

Context position

Average ranking score
