# Supplementary material
Source: ML conference proceedings conference paper supplement (https://aclanthology.org/2024.emnlp-main.534)

Context position

0  
1  
2  
3  
4  
5  
6  
7

Alcatel  
CHUWI  
Google  
LG  
Huawei  
Samsung  
Acer  
Apple

Document

Average ranking score

7  
6  
5  
4  
3  
2

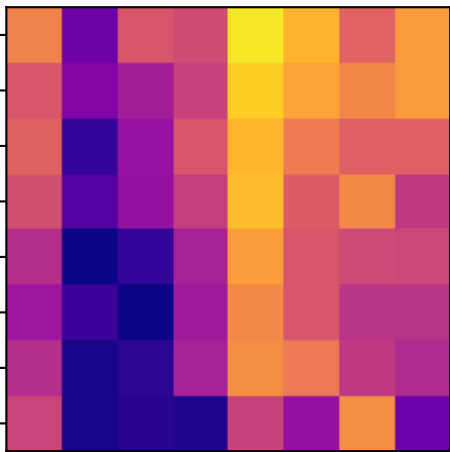

Supplement: software [file 2024.emnlp-main.534.software.zip]
