# Supplementary material
Source: ML conference proceedings conference paper supplement (https://aclanthology.org/2024.emnlp-main.534)

Context position

0  
2  
1  
3  
4  
5  
6  
7

Craftsm...  
Ridgid  
Stanley  
Wera  
Makita  
DeWalt  
Bosch  
Megapro

Product name

Average ranking score

8  
7  
6  
5  
4  
3  
2

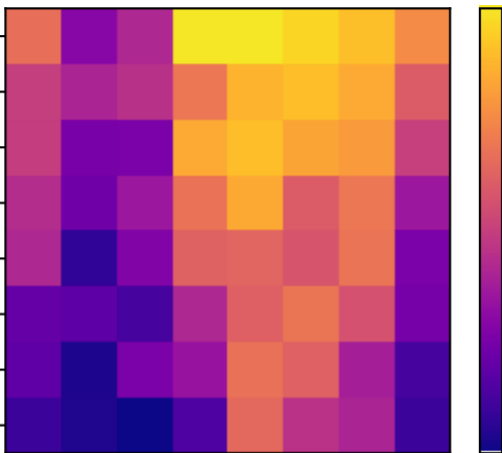

Supplement: software [file 2024.emnlp-main.534.software.zip]
