# Supplementary material
Source: ML conference proceedings conference paper supplement (https://aclanthology.org/2024.emnlp-main.534)

Context position

7  
6  
5  
4  
3  
2  
1  
0

Bang Ol...  
Audio-T...  
Yamaha  
Samsung  
Beats  
Razer  
Bose  
Bowers...

Document

Average ranking score

8  
7  
6  
5  
4  
3  
2

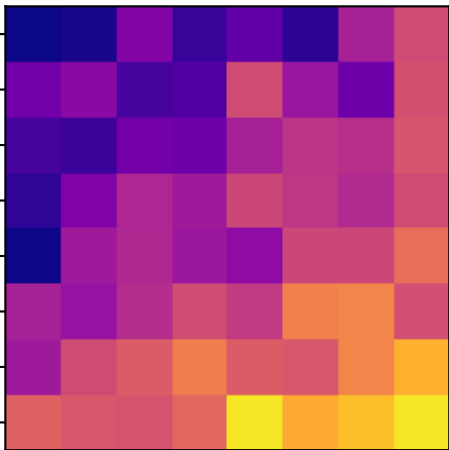

Supplement: software [file 2024.emnlp-main.534.software.zip]
