# Supplementary material
Source: ML conference proceedings conference paper supplement (https://aclanthology.org/2024.emnlp-main.534)
Supplement: software [file 2024.emnlp-main.534.software.zip]

Document

Frigidaire  
Whynter  
BlackDe...  
Hisense  
Midea  
Friedrich  
SereneL...  
Danby

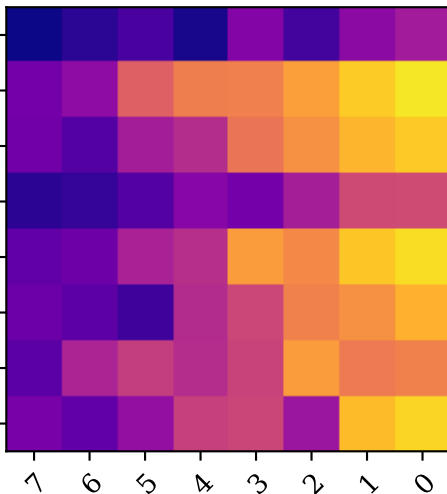

Context position

Average ranking score
