# Supplementary material
Source: ML conference proceedings conference paper supplement (https://aclanthology.org/2024.emnlp-main.534)

Context position

1  
0  
2  
3  
5  
4  
6  
7

Purism  
Razer  
Huawei  
MSI  
Apple  
Asus  
Acer  
Fujitsu

Document

Average ranking score

7  
6  
5  
4  
3  
2  
1

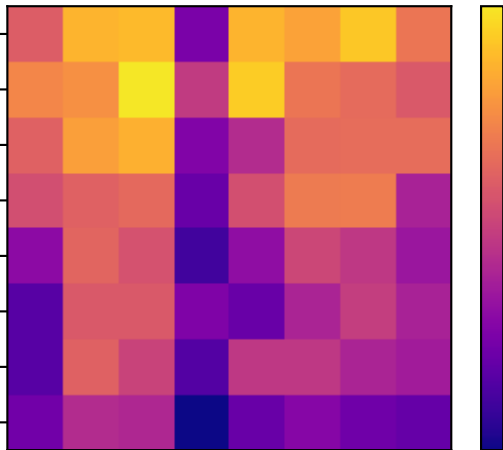

Supplement: software [file 2024.emnlp-main.534.software.zip]
