# Supplementary material
Source: ML conference proceedings conference paper supplement (https://aclanthology.org/2024.emnlp-main.534)
Supplement: software [file 2024.emnlp-main.534.software.zip]

Document

Yellow L...  
ENO Ea...  
Castawa...  
Vivere  
Hatteras...  
Pawleys ...  
Hennes...  
Warbon...

Warbon...  
Hennes...  
Pawleys ...  
Hatteras...  
Vivere  
Castawa...  
ENO Ea...  
Yellow L...

Product name

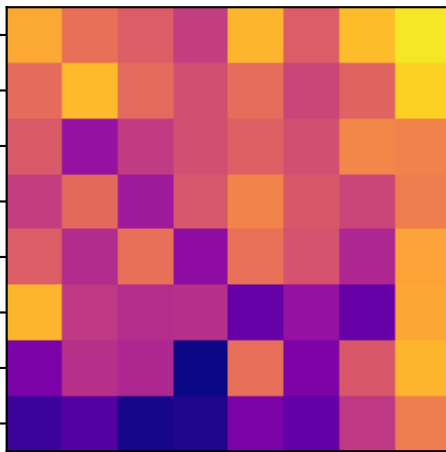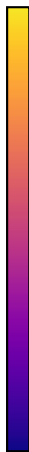

Average ranking score
