# Supplementary material
Source: ML conference proceedings conference paper supplement (https://aclanthology.org/2024.emnlp-main.534)
Supplement: software [file 2024.emnlp-main.534.software.zip]

Document

Wolf Go...

Breville

Philips

All-Clad

DeLonghi

West Be...

Presto

Panason...

Panason...

Presto

West Be...

DeLonghi

All-Clad

Philips

Breville

Wolf Go...

Product name

Average ranking score

7

6

5

4

3

2

1

0
