# Supplementary material
Source: ML conference proceedings conference paper supplement (https://aclanthology.org/2024.emnlp-main.534)

Document

Bang Ol...  
Bose  
Audio-T...  
Bowers...  
Samsung  
Razer  
Yamaha  
Beats

Beats  
Yamaha  
Razer  
Samsung  
Bowers...  
Audio-T...  
Bose  
Bang Ol...

Product name

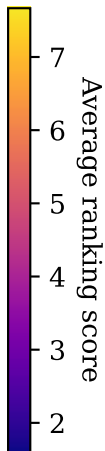

Supplement: software [file 2024.emnlp-main.534.software.zip]
