# Supplementary material
Source: ML conference proceedings conference paper supplement (https://aclanthology.org/2024.emnlp-main.534)

Context position

7  
6  
5  
4  
3  
2  
1  
0

Opove  
Yunmai  
Renpho  
Acheda...  
TimTam  
Medcur...  
Therabo...  
Hyperice

Product name

Average ranking score

8  
7  
6  
5  
4  
3  
2  
1  
0

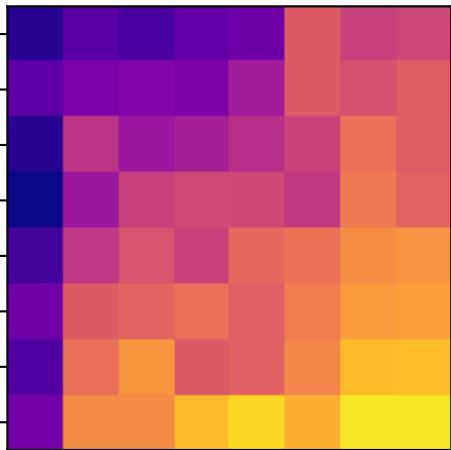

Supplement: software [file 2024.emnlp-main.534.software.zip]
