# Supplementary material
Source: ML conference proceedings conference paper supplement (https://aclanthology.org/2024.emnlp-main.534)
Supplement: software [file 2024.emnlp-main.534.software.zip]

Product name

Orbit  
Claber  
Rain Bird  
Gardena  
Hozelock  
Weathe...  
Raindrip  
Holman

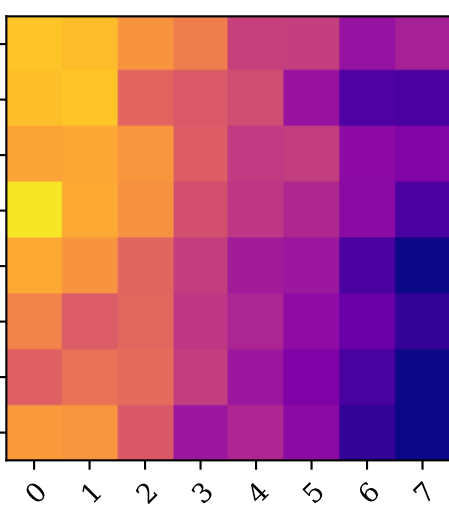

Context position

Average ranking score
