# Supplementary material
Source: ML conference proceedings conference paper supplement (https://aclanthology.org/2024.emnlp-main.534)

Context position

0

2

1

4

3

5

6

7

Document

Montez...

Viper To...

Extreme...

Homak

Kennedy

Milwauk...

Dewalt

Craftsm...

Average ranking score

7

6

5

4

3

2

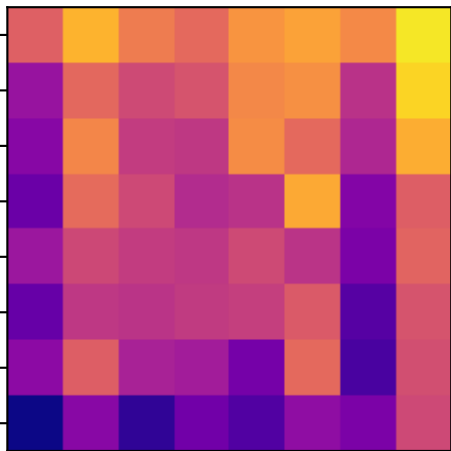

Supplement: software [file 2024.emnlp-main.534.software.zip]
