# Supplementary material
Source: ML conference proceedings conference paper supplement (https://aclanthology.org/2024.emnlp-main.534)

Document

Huawei  
Samsung  
Apple  
Acer  
Alcatel  
LG  
Google  
CHUWI

CHUWI  
Google  
LG  
Alcatel  
Acer  
Apple  
Samsung  
Huawei

Product name

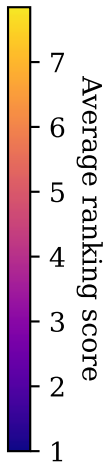

Supplement: software [file 2024.emnlp-main.534.software.zip]
