# Supplementary material
Source: ML conference proceedings conference paper supplement (https://aclanthology.org/2024.emnlp-main.534)
Supplement: software [file 2024.emnlp-main.534.software.zip]

Document

Bang Ol...  
Bose  
Bowers...  
Audio-T...  
Beats  
Razer  
Yamaha  
Samsung

Samsung  
Yamaha  
Razer  
Beats  
Audio-T...  
Bowers...  
Bose  
Bang Ol...

Product name

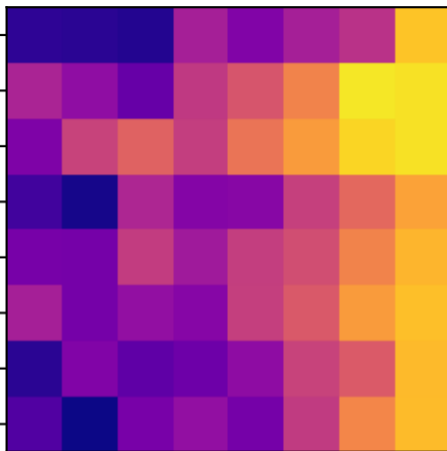

Average ranking score

7  
6  
5  
4  
3  
2
