# Supplementary material
Source: ML conference proceedings conference paper supplement (https://aclanthology.org/2024.emnlp-main.534)
Supplement: software [file 2024.emnlp-main.534.software.zip]

Product name

Poulan ...  
 Stihl  
 Husqvar...  
 Ryobi  
 Dewalt  
 Black D...  
 Worx  
 Makita

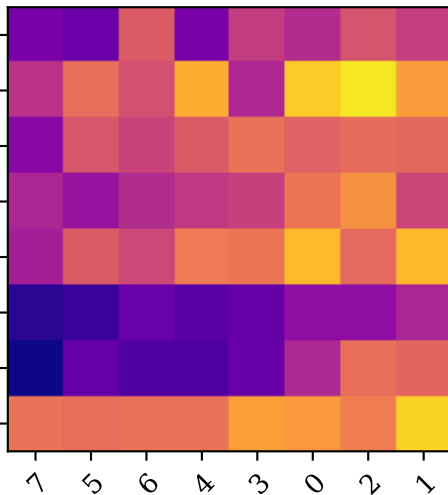

1 5 6 4 3 0 2 1

Context position

Average ranking score
