# Supplementary material
Source: ML conference proceedings conference paper supplement (https://aclanthology.org/2024.emnlp-main.534)
Supplement: software [file 2024.emnlp-main.534.software.zip]

**Chicago Pneuma...**

DeWalt

Ingersoll Rand

Makita

Porter-Cable

Quincy Compres...

Rolair

Sullair

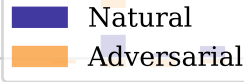

0 1 2 3 4 5 6 7 8

Ranking score
