# Supplementary material
Source: ML conference proceedings conference paper supplement (https://aclanthology.org/2024.emnlp-main.534)
Supplement: software [file 2024.emnlp-main.534.software.zip]

Product name

L'Oréal  
Redken  
Paul Mit...  
Matrix  
Dove  
Herbal E...  
Garnier  
Pantene

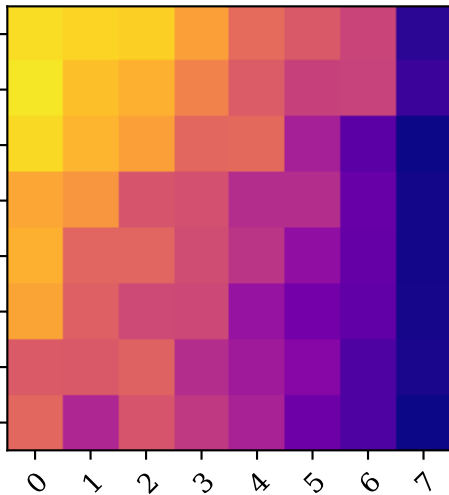

Context position

Average ranking score
