# Supplementary material
Source: ML conference proceedings conference paper supplement (https://aclanthology.org/2024.emnlp-main.534)

# Big Green Egg

Blackstone

Broil King

Char-Broil

Kamado Joe

Pit Boss

Traeger

Weber

0

1

2

3

4

5

6

7

8

Ranking score

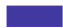

Natural

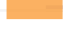

Adversarial

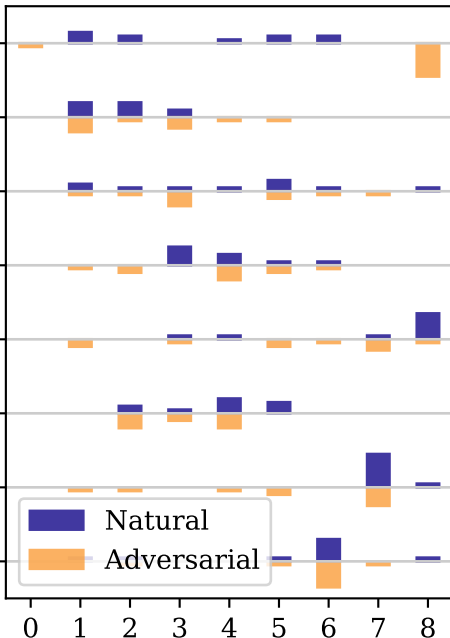

Supplement: software [file 2024.emnlp-main.534.software.zip]
