# Supplementary material
Source: ML conference proceedings conference paper supplement (https://aclanthology.org/2024.emnlp-main.534)

Context position

1  
2  
0  
3  
4  
6  
5  
7

Makita  
Worx  
Black D...  
Dewalt  
Ryobi  
Husqvar...  
Stihl  
Poulan ...

Document

Average ranking score

7  
6  
5  
4  
3  
2

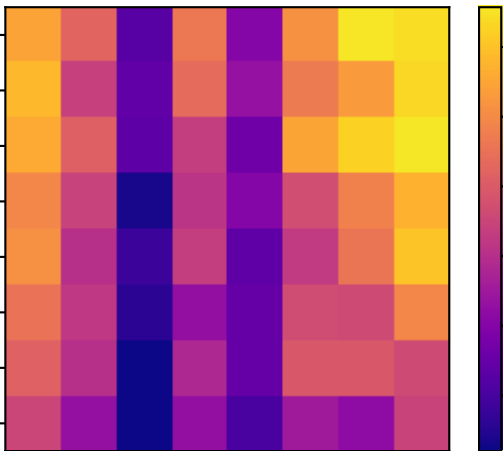

Supplement: software [file 2024.emnlp-main.534.software.zip]
