# Supplementary material
Source: ML conference proceedings conference paper supplement (https://aclanthology.org/2024.emnlp-main.534)
Supplement: software [file 2024.emnlp-main.534.software.zip]

**Black Decker**

Dewalt

Husqvarna

Makita

Poulan Pro

Ryobi

Stihl

Worx

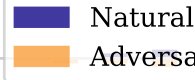

Natural

Adversarial

Ranking score
