# Supplementary material
Source: ML conference proceedings conference paper supplement (https://aclanthology.org/2024.emnlp-main.534)

Document

Dove  
L'Oréal  
Herbal E...  
Pantene  
Matrix  
Garnier  
Redken  
Paul Mit...

Paul Mit...  
Redken  
Garnier  
Matrix  
Pantene  
Herbal E...  
L'Oréal  
Dove

Product name

Average ranking score

6  
5  
4  
3

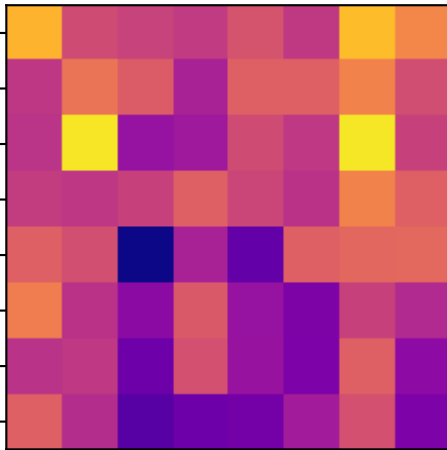

Supplement: software [file 2024.emnlp-main.534.software.zip]
