# Supplementary material
Source: ML conference proceedings conference paper supplement (https://aclanthology.org/2024.emnlp-main.534)

Document

Bosch  
DeWalt  
Milwauk...  
Metabo  
Porter-...  
SKIL  
BLACK...  
Ryobi

Ryobi  
BLACK...  
SKIL  
Porter-...  
Metabo  
Milwauk...  
DeWalt  
Bosch

Product name

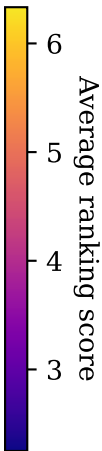

Supplement: software [file 2024.emnlp-main.534.software.zip]
