# Supplementary material
Source: ML conference proceedings conference paper supplement (https://aclanthology.org/2024.emnlp-main.534)
Supplement: software [file 2024.emnlp-main.534.software.zip]

Product name

Huawei  
Purism  
MSI  
Acer  
Apple  
Razer  
Fujitsu  
Asus

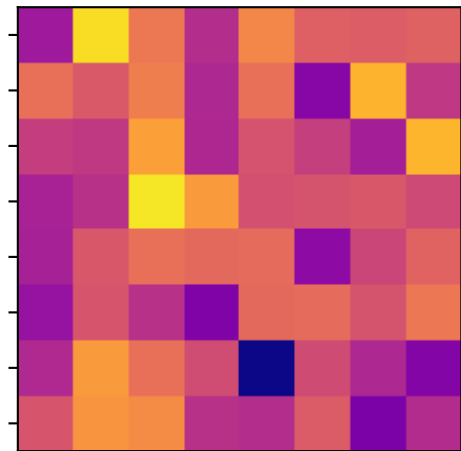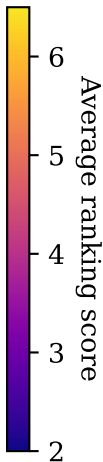

Document

Asus  
Fujitsu  
Razer  
Apple  
Acer  
MSI  
Purism  
Huawei
