# Supplementary material
Source: ML conference proceedings conference paper supplement (https://aclanthology.org/2024.emnlp-main.534)

Document

Wolf Go...  
Breville  
All-Clad  
DeLonghi  
Philips  
West Be...  
Panason...  
Presto

Presto  
Panason...  
West Be...  
Philips  
DeLonghi  
All-Clad  
Breville  
Wolf Go...

Product name

Average ranking score

7  
6  
5  
4  
3  
2  
1  
0

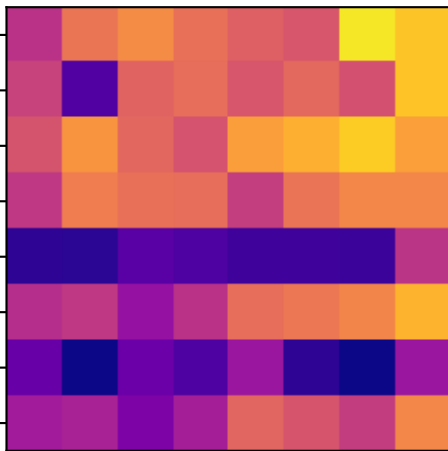

Supplement: software [file 2024.emnlp-main.534.software.zip]
