# Supplementary material
Source: ML conference proceedings conference paper supplement (https://aclanthology.org/2024.emnlp-main.534)

Context position

7  
6  
5  
4  
3  
2  
1  
0

Paasche  
Graco  
Fuji Spr...  
Apollo S...  
HomeRi...  
Sata  
Wagner  
Sharpe

Document

Average ranking score

8  
7  
6  
5  
4  
3  
2

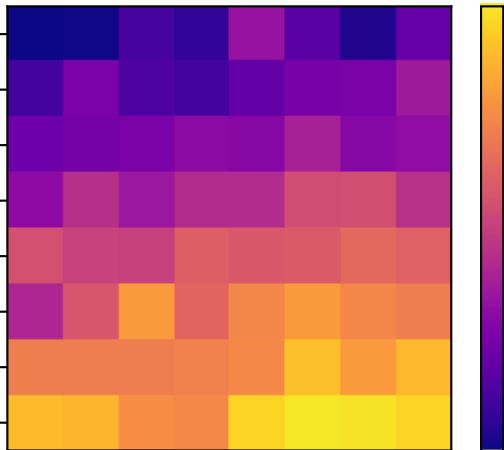

Supplement: software [file 2024.emnlp-main.534.software.zip]
