# Supplementary material
Source: ML conference proceedings conference paper supplement (https://aclanthology.org/2024.emnlp-main.534)

Product name

Frigidaire

Whynter

BlackDe...

Hisense

Midea

Friedrich

SereneL...

Danby

7

6

5

4

3

2

1

0

Context position

Average ranking score

7

6

5

4

3

2

1

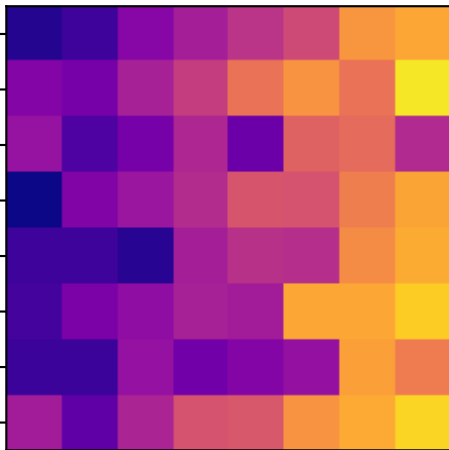

Supplement: software [file 2024.emnlp-main.534.software.zip]
