# Supplementary material
Source: ML conference proceedings conference paper supplement (https://aclanthology.org/2024.emnlp-main.534)
Supplement: software [file 2024.emnlp-main.534.software.zip]

Product name

Wolf Go...  
Breville  
All-Clad  
DeLonghi  
Philips  
West Be...  
Panason...  
Presto

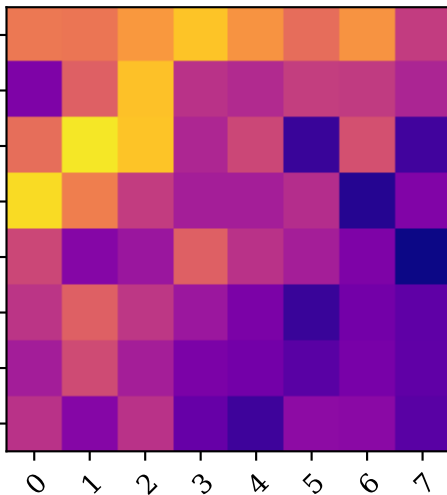

Context position

Average ranking score
