# Supplementary material
Source: ML conference proceedings conference paper supplement (https://aclanthology.org/2024.emnlp-main.534)
Supplement: software [file 2024.emnlp-main.534.software.zip]

Document

Spectra...

Bosch

DeWalt

Hilti

Leica

Makita

Fluke

Stanley

7

6

5

4

3

2

1

0

Context position

Average ranking score

7

6

5

4

3

2
