# Supplementary material
Source: ML conference proceedings conference paper supplement (https://aclanthology.org/2024.emnlp-main.534)

Context position

7  
6  
5  
4  
3  
2  
1  
0

Philips  
Panason...  
Presto  
West Be...  
DeLonghi  
All-Clad  
Breville  
Wolf Go...

Document

Average ranking score

8  
7  
6  
5  
4  
3  
2  
1

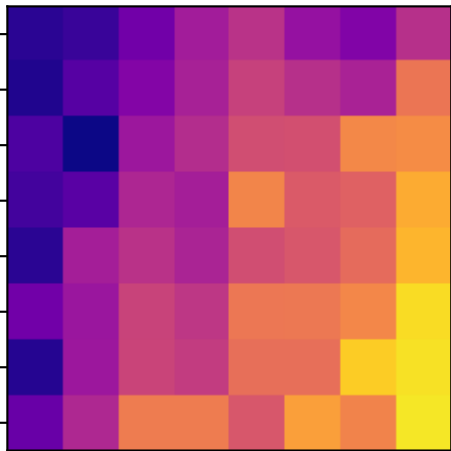

Supplement: software [file 2024.emnlp-main.534.software.zip]
