# Supplementary material
Source: ML conference proceedings conference paper supplement (https://aclanthology.org/2024.emnlp-main.534)

Context position

7  
6  
5  
4  
3  
2  
1  
0

Ilife  
Bissell  
Xiaomi  
Miele  
Shark  
Eufy  
Ecovacs  
Samsung

Product name

Average ranking score

7  
6  
5  
4  
3  
2

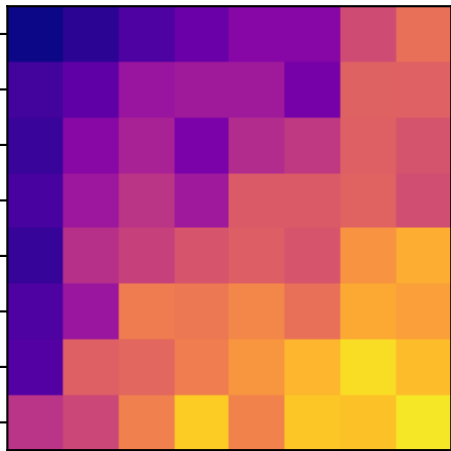

Supplement: software [file 2024.emnlp-main.534.software.zip]
