# Supplementary material
Source: ML conference proceedings conference paper supplement (https://aclanthology.org/2024.emnlp-main.534)
Supplement: software [file 2024.emnlp-main.534.software.zip]

Product name

Herbal E...

Dove

Matrix

L'Oréal

Pantene

Garnier

Paul Mit...

Redken

Redken

Paul Mit...

Garnier

Pantene

L'Oréal

Matrix

Dove

Herbal E...

Document

Average ranking score

6

5

4

3

2
