# Supplementary material
Source: ML conference proceedings conference paper supplement (https://aclanthology.org/2024.emnlp-main.534)
Supplement: software [file 2024.emnlp-main.534.software.zip]

Product name

Blendtec

Ninja

KitchenA...

Breville

Tefal

Hamilton...

Oster

Smeg

0

1

2

3

4

5

6

7

Context position

Average ranking score

8

7

6

5

4

3

2

1
