# Supplementary material
Source: ML conference proceedings conference paper supplement (https://aclanthology.org/2024.emnlp-main.534)

Context position

0  
1  
2  
4  
3  
5  
6  
7

Croc  
Amika  
FHI Heat  
Bio Ionic  
T3  
Remingt...  
ghd  
BaBylis...

Document

Average ranking score

7  
6  
5  
4  
3  
2  
1

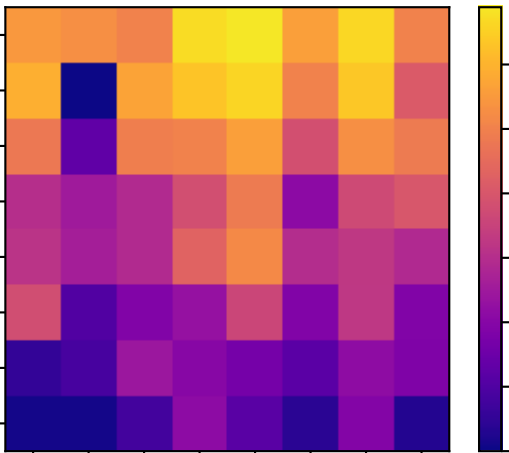

Supplement: software [file 2024.emnlp-main.534.software.zip]
