# Supplementary material
Source: ML conference proceedings conference paper supplement (https://aclanthology.org/2024.emnlp-main.534)

Context position

0  
2  
1  
3  
4  
5  
6  
7

Miele  
Gaggia  
Hamilton...  
Philips  
Nespres...  
Jura  
Breville  
DeLonghi

Product name

Average ranking score

7  
6  
5  
4  
3  
2

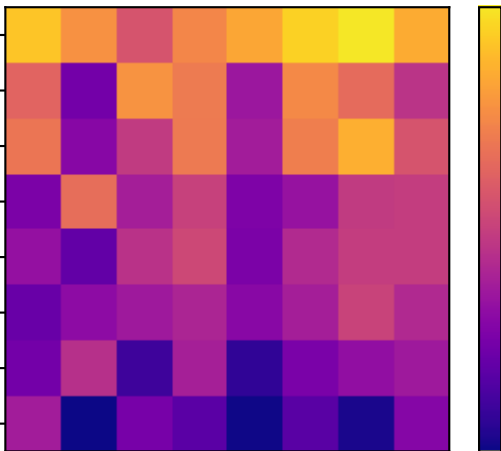

Supplement: software [file 2024.emnlp-main.534.software.zip]
