# Supplementary material
Source: ML conference proceedings conference paper supplement (https://aclanthology.org/2024.emnlp-main.534)

Context position

1  
0  
2  
3  
4  
5  
7  
6

Beko  
Hisense  
Zanussi  
Hotpoint  
Haier  
Miele  
Electrol...  
GE Appl...

Document

Average ranking score

7  
6  
5  
4  
3  
2  
1

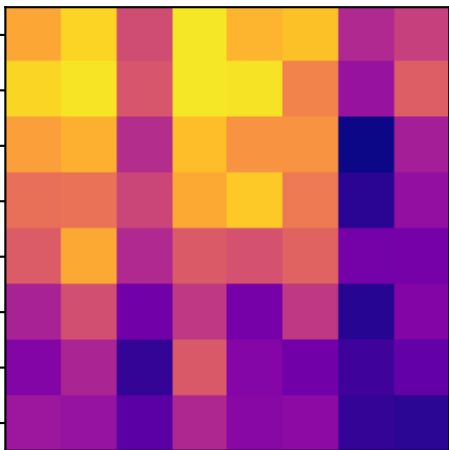

Supplement: software [file 2024.emnlp-main.534.software.zip]
