# Supplementary material
Source: ML conference proceedings conference paper supplement (https://aclanthology.org/2024.emnlp-main.534)
Supplement: software [file 2024.emnlp-main.534.software.zip]

Product name

Blendtec  
Ninja  
Breville  
KitchenA...  
Oster  
Hamilton...  
Tefal  
Smeg

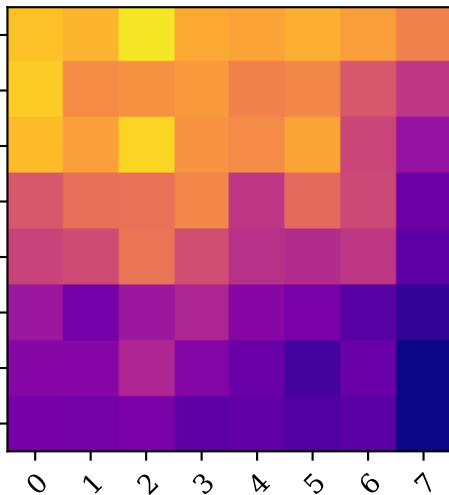

Context position

Average ranking score
