# Supplementary material
Source: ML conference proceedings conference paper supplement (https://aclanthology.org/2024.emnlp-main.534)
Supplement: software [file 2024.emnlp-main.534.software.zip]

Product name

Poulan ...

Stihl

Husqvar...

Ryobi

Dewalt

Black D...

Worx

Makita

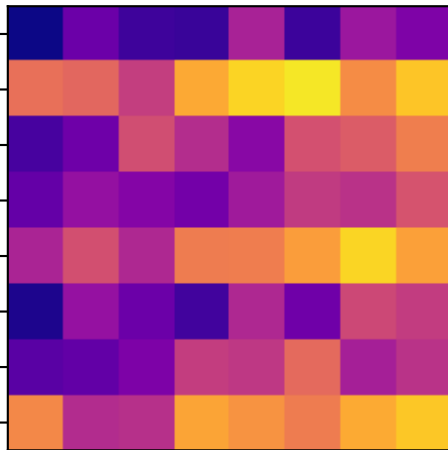

1

5

6

3

4

2

1

0

Context position

Average ranking score

7  
6  
5  
4  
3  
2  
1
