# Supplementary material
Source: ML conference proceedings conference paper supplement (https://aclanthology.org/2024.emnlp-main.534)
Supplement: software [file 2024.emnlp-main.534.software.zip]

Product name

Samsung

Huawei

LG

Google

CHUWI

Alcatel

Apple

Acer

7

6

5

4

3

2

1

0

Context position

Average ranking score

7

6

5

4

3

2
