# Supplementary material
Source: ML conference proceedings conference paper supplement (https://aclanthology.org/2024.emnlp-main.534)
Supplement: software [file 2024.emnlp-main.534.software.zip]

Document

Samsung

Huawei

Apple

Google

Acer

LG

CHUWI

Alcatel

Alcatel

CHUWI

LG

Acer

Google

Apple

Huawei

Samsung

Product name

Average ranking score

7

6

5

4

3

2
