# Supplementary material
Source: ML conference proceedings conference paper supplement (https://aclanthology.org/2024.emnlp-main.534)
Supplement: software [file 2024.emnlp-main.534.software.zip]

Product name

Ninja  
Blendtec  
Hamilton...  
Breville  
KitchenA...  
Oster  
Smeg  
Tefal

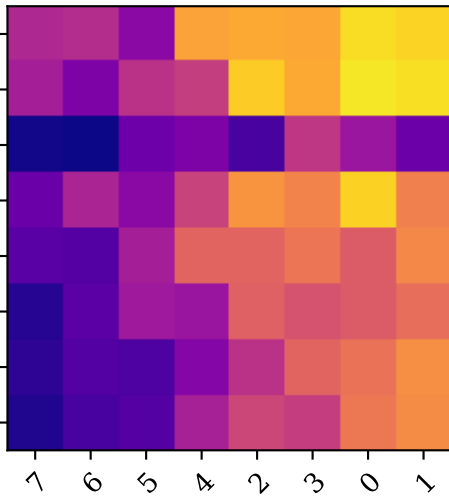

Context position

Average ranking score
