# Supplementary material
Source: ML conference proceedings conference paper supplement (https://aclanthology.org/2024.emnlp-main.534)

Product name

Ultimate...  
Anker S...  
Bose  
JBL  
Marshall  
Harman...  
Tribit  
Yamaha

Yamaha  
Tribit  
Harman...  
Marshall  
JBL  
Bose  
Anker S...  
Ultimate...

Document

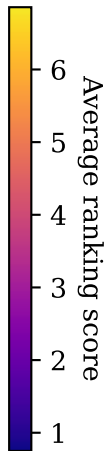

Supplement: software [file 2024.emnlp-main.534.software.zip]
