# Supplementary material
Source: ML conference proceedings conference paper supplement (https://aclanthology.org/2024.emnlp-main.534)
Supplement: software [file 2024.emnlp-main.534.software.zip]

Product name

Magic C...

Galanz

LG

Panason...

Sharp

Toshiba

Breville

Haier

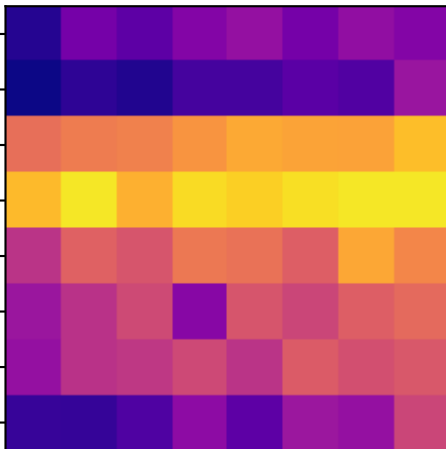

1

6

5

1

4

3

2

0

Context position

Average ranking score
