# Supplementary material
Source: ML conference proceedings conference paper supplement (https://aclanthology.org/2024.emnlp-main.534)
Supplement: software [file 2024.emnlp-main.534.software.zip]

Product name

Samsung

Huawei

Xiaomi

OnePlus

Sony

LG

OPPO

Alcatel

Alcatel

OPPO

LG

Sony

OnePlus

Xiaomi

Huawei

Samsung

Document

Average ranking score

8

7

6

5

4

3

2

1
