# Supplementary material
Source: ML conference proceedings conference paper supplement (https://aclanthology.org/2024.emnlp-main.534)

Context position

0  
2  
1  
4  
3  
6  
5  
7

Apollo S...  
Paasche  
Sharpe  
Sata  
Fuji Spr...  
HomeRi...  
Wagner  
Graco

Product name

Average ranking score

7  
6  
5  
4  
3  
2

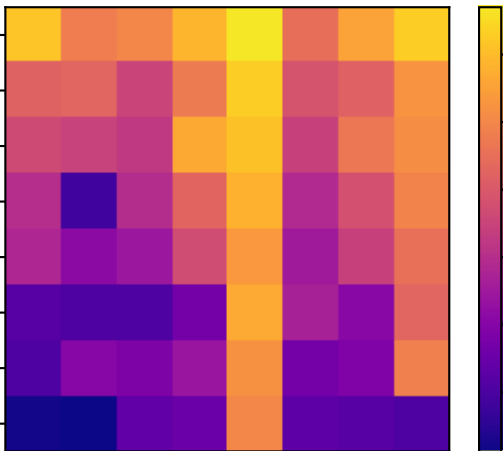

Supplement: software [file 2024.emnlp-main.534.software.zip]
