# Supplementary material
Source: ML conference proceedings conference paper supplement (https://aclanthology.org/2024.emnlp-main.534)

Context position

0  
1  
2  
3  
4  
5  
6  
7

Lian Li  
Zalman  
Gigabyte  
FSP Gr...  
Fractal ...  
EVGA  
Be Quiet  
MSI

Product name

Average ranking score

7  
6  
5  
4  
3  
2  
1

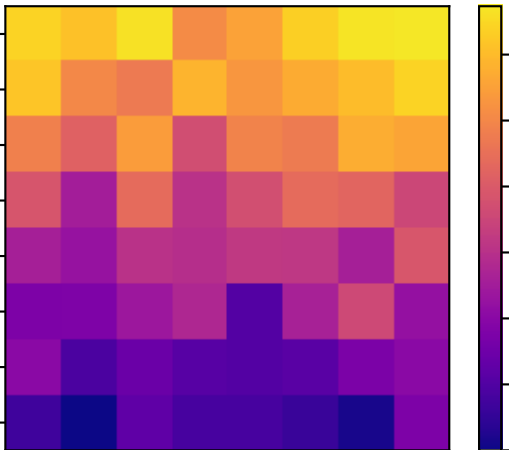

Supplement: software [file 2024.emnlp-main.534.software.zip]
