# Supplementary material
Source: ML conference proceedings conference paper supplement (https://aclanthology.org/2024.emnlp-main.534)
Supplement: software [file 2024.emnlp-main.534.software.zip]

**BLACKDECKER**

Bosch

DeWalt

Metabo

Milwaukee

Porter-Cable

Ryobi

SKIL

0

1

2

3

4

5

6

7

8

Ranking score

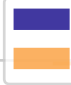

Natural

Adversarial
