# Supplementary material
Source: ML conference proceedings conference paper supplement (https://aclanthology.org/2024.emnlp-main.534)

Document

Milwauk...  
Bosch  
Hitachi ...  
Skil  
Craftsm...  
DeWalt  
Einhell  
BlackDe...

BlackDe...  
Einhell  
DeWalt  
Craftsm...  
Skil  
Hitachi ...  
Bosch  
Milwauk...

Product name

Average ranking score

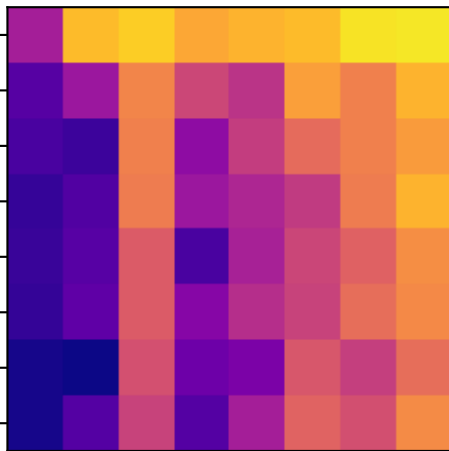

Supplement: software [file 2024.emnlp-main.534.software.zip]
