# Supplementary material
Source: ML conference proceedings conference paper supplement (https://aclanthology.org/2024.emnlp-main.534)

Product name

Milwauk...

Bosch

DeWalt

Hitachi ...

Skil

Craftsm...

Einhell

BlackDe...

0

1

2

3

4

5

6

7

Context position

Average ranking score

7

6

5

4

3

2

1

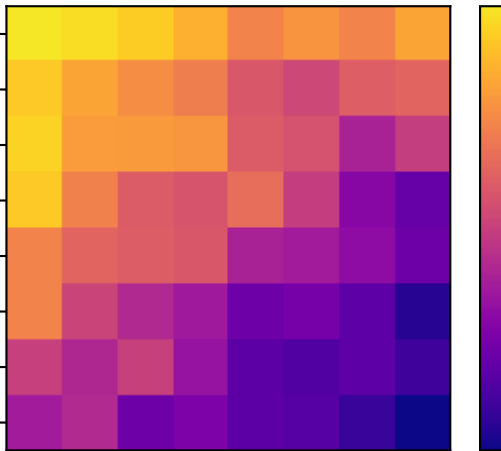

Supplement: software [file 2024.emnlp-main.534.software.zip]
