# Supplementary material
Source: ML conference proceedings conference paper supplement (https://aclanthology.org/2024.emnlp-main.534)

Product name

Panason...  
Sharp  
LG  
Toshiba  
Breville  
Magic C...  
Galanz  
Haier

Haier  
Galanz  
Magic C...  
Breville  
Toshiba  
LG  
Sharp  
Panason...

Document

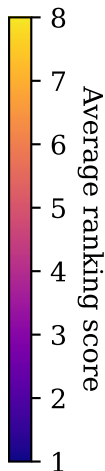

Supplement: software [file 2024.emnlp-main.534.software.zip]
