# Supplementary material
Source: ML conference proceedings conference paper supplement (https://aclanthology.org/2024.emnlp-main.534)
Supplement: software [file 2024.emnlp-main.534.software.zip]

Product name

Poulan ...  
Stihl  
Husqvar...  
Ryobi  
Dewalt  
Black D...  
Worx  
Makita

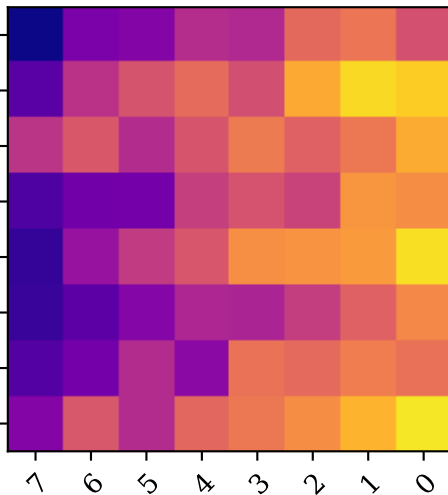

Context position

Average ranking score
