# Supplementary material
Source: ML conference proceedings conference paper supplement (https://aclanthology.org/2024.emnlp-main.534)
Supplement: software [file 2024.emnlp-main.534.software.zip]

Product name

Fuji Spr...

Graco

Sata

Wagner

HomeRi...

Apollo S...

Sharpe

Paasche

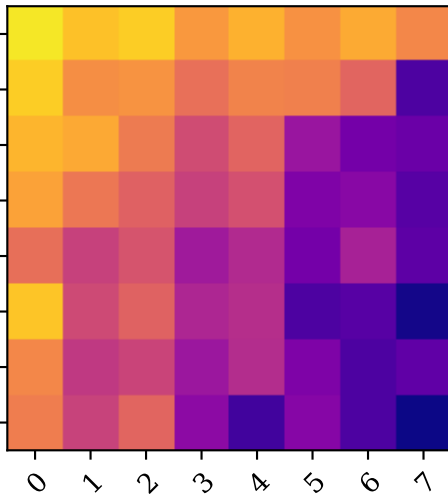

Context position

Average ranking score
