# Supplementary material
Source: ML conference proceedings conference paper supplement (https://aclanthology.org/2024.emnlp-main.534)

Context position

0  
2  
1  
3  
4  
5  
6  
7

Kemei  
Babylis...  
Gillette  
Bevel  
Andis  
Remingt...  
Panason...  
Wahl

Document

Average ranking score

7  
6  
5  
4  
3  
2

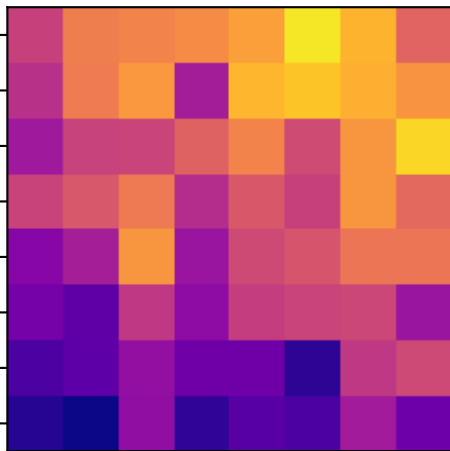

Supplement: software [file 2024.emnlp-main.534.software.zip]
