# Supplementary material
Source: ML conference proceedings conference paper supplement (https://aclanthology.org/2024.emnlp-main.534)
Supplement: software [file 2024.emnlp-main.534.software.zip]

Document

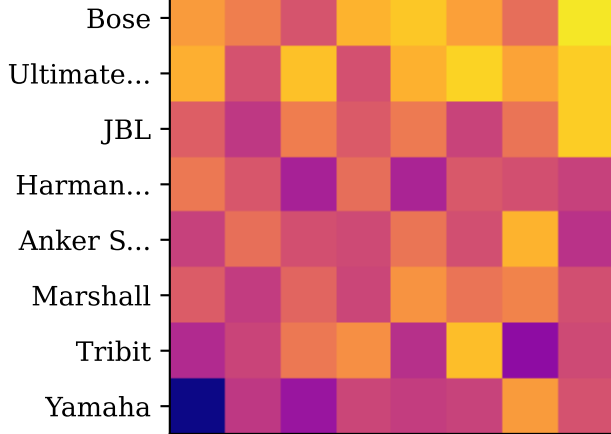

Average ranking score

Yamaha  
Tribit  
Marshall  
Anker S...  
Harman...  
JBL  
Ultimate...  
Bose

Product name
