# Supplementary material
Source: ML conference proceedings conference paper supplement (https://aclanthology.org/2024.emnlp-main.534)
Supplement: software [file 2024.emnlp-main.534.software.zip]

Product name

Presto  
All-Clad  
West Be...  
DeLonghi  
Wolf Go...  
Breville  
Philips  
Panason...

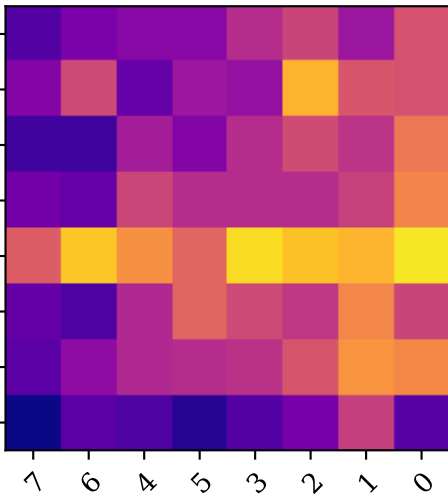

Context position

Average ranking score
