# Supplementary material
Source: ML conference proceedings conference paper supplement (https://aclanthology.org/2024.emnlp-main.534)
Supplement: software [file 2024.emnlp-main.534.software.zip]

Product name

Herbal E...

Pantene

Matrix

Dove

Garnier

L'Oréal

Redken

Paul Mit...

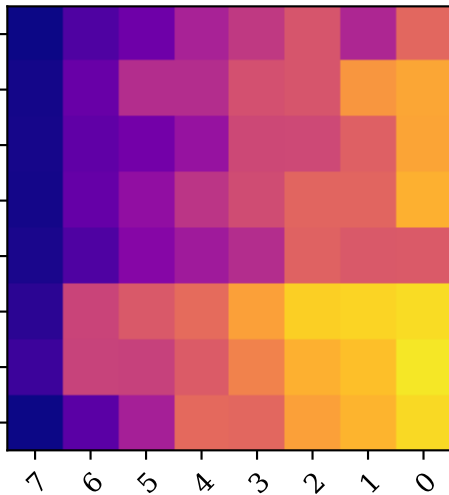

Context position

Average ranking score
