# Supplementary material
Source: ML conference proceedings conference paper supplement (https://aclanthology.org/2024.emnlp-main.534)
Supplement: software [file 2024.emnlp-main.534.software.zip]

Product name

Castawa...  
ENO Ea...  
Hennes...  
Vivere  
Warbon...  
Hatteras...  
Yellow L...  
Pawleys ...

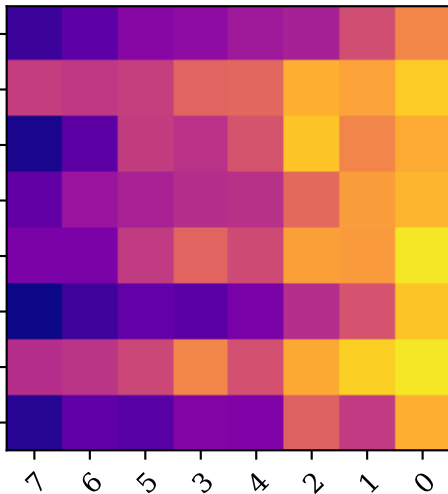

Context position

Average ranking score
