# Supplementary material
Source: ML conference proceedings conference paper supplement (https://aclanthology.org/2024.emnlp-main.534)
Supplement: software [file 2024.emnlp-main.534.software.zip]

Product name

Fujitsu  
Acer  
Asus  
Apple  
MSI  
Huawei  
Razer  
Purism

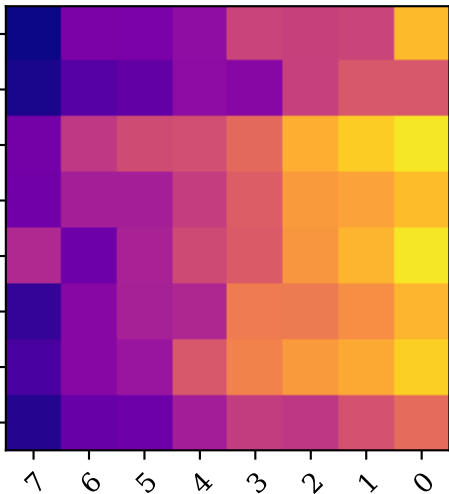

Context position

Average ranking score
