# Supplementary material
Source: ML conference proceedings conference paper supplement (https://aclanthology.org/2024.emnlp-main.534)

Context position

0

1

2

3

4

5

6

7

Miele

KitchenA...

Maytag

Whirlpool

Avanti

Frigidaire

Haier

Fisher P...

Document

Average ranking score

7

6

5

4

3

2

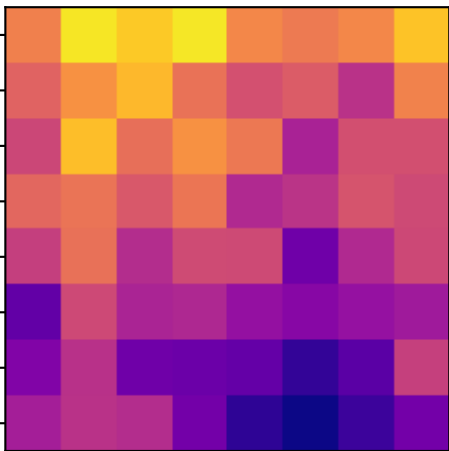

Supplement: software [file 2024.emnlp-main.534.software.zip]
