# Supplementary material
Source: ML conference proceedings conference paper supplement (https://aclanthology.org/2024.emnlp-main.534)

Document

Westing...

Generac

Stanley

DeWalt

Kärcher

Stihl

Mi-T-M

Veloci

Veloci

Mi-T-M

Stihl

Kärcher

DeWalt

Stanley

Generac

Westing...

Product name

Average ranking score

7  
6  
5  
4  
3  
2

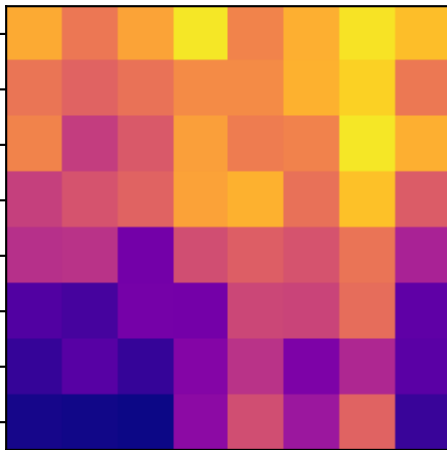

Supplement: software [file 2024.emnlp-main.534.software.zip]
