# Supplementary material
Source: ML conference proceedings conference paper supplement (https://aclanthology.org/2024.emnlp-main.534)

Context position

7  
6  
5  
4  
3  
2  
1  
0

Average ranking score

7  
6  
5  
4  
3  
2

Zyxel  
TerraMa...  
Seagate  
ioSafe  
Fujitsu  
Infortre...  
Buffalo ...  
Synology

Product name

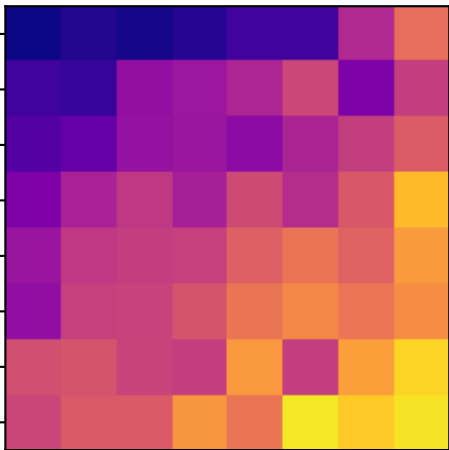

Supplement: software [file 2024.emnlp-main.534.software.zip]
