# Supplementary material (part 1 of 28)
Source: ML conference proceedings conference paper supplement (https://aclanthology.org/2024.emnlp-main.534)

Product name

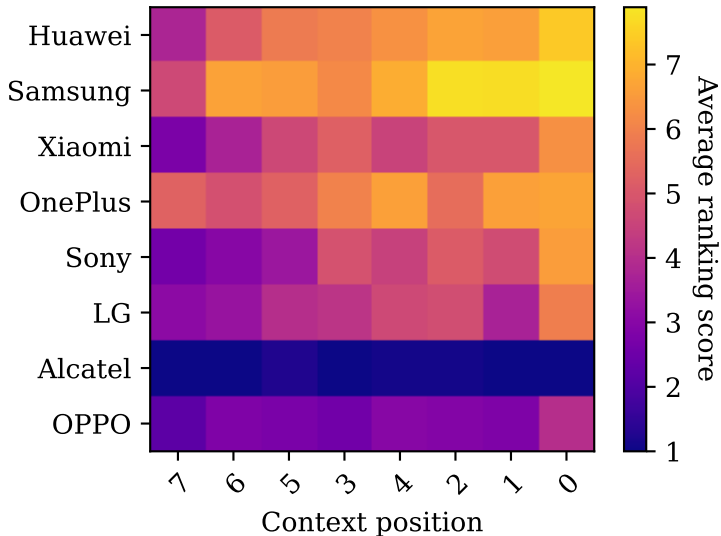

Supplement: software [file 2024.emnlp-main.534.software.zip]

Product name

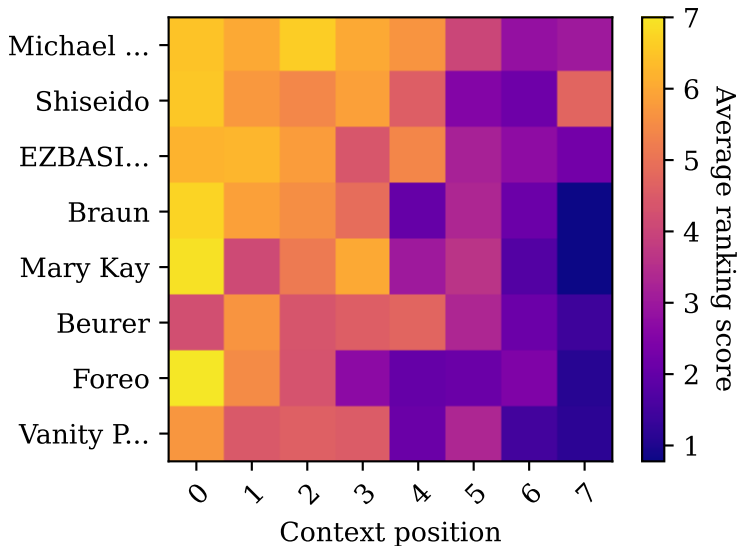

Supplement: software [file 2024.emnlp-main.534.software.zip]

Product name

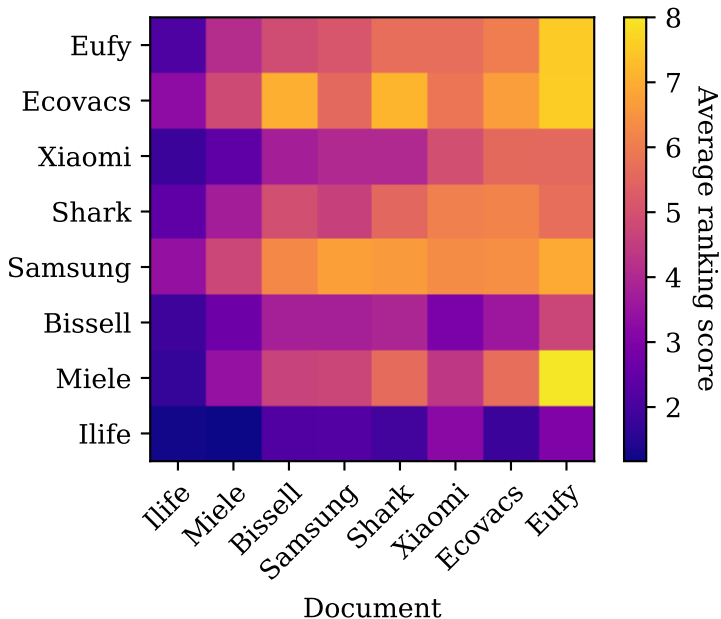

Supplement: software [file 2024.emnlp-main.534.software.zip]

Product name

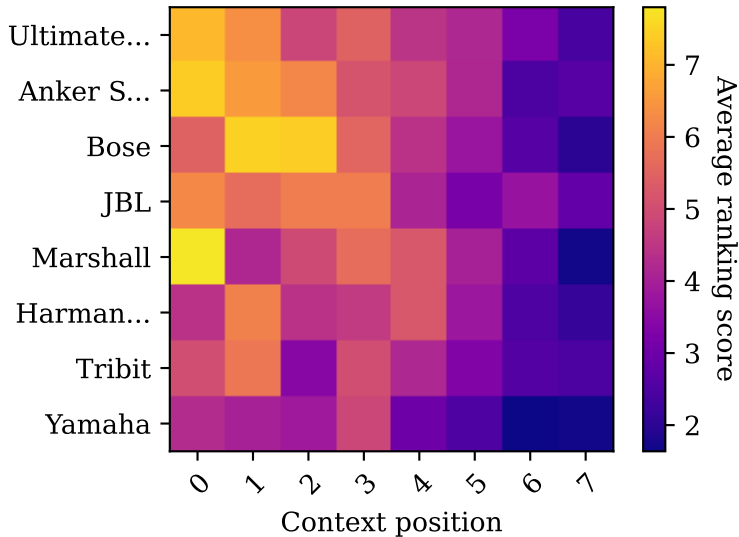

Supplement: software [file 2024.emnlp-main.534.software.zip]

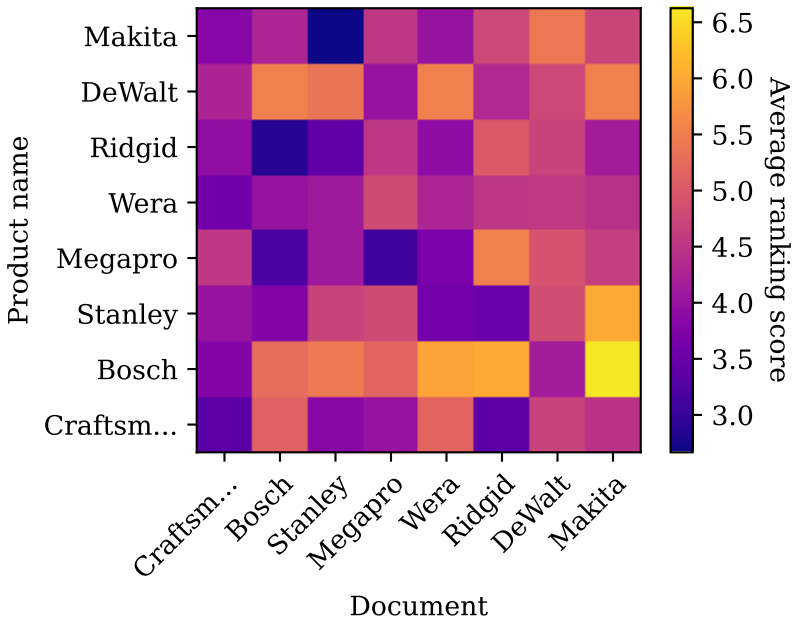

Supplement: software [file 2024.emnlp-main.534.software.zip]

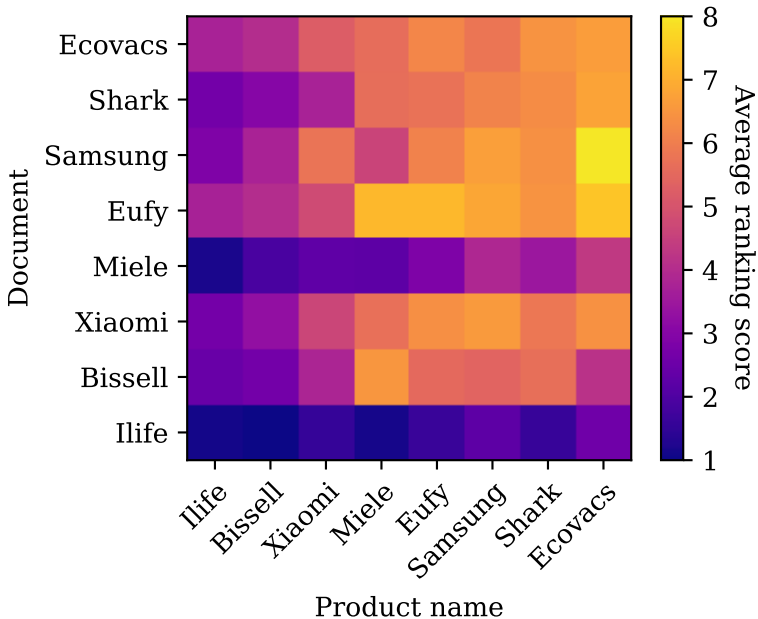

Supplement: software [file 2024.emnlp-main.534.software.zip]

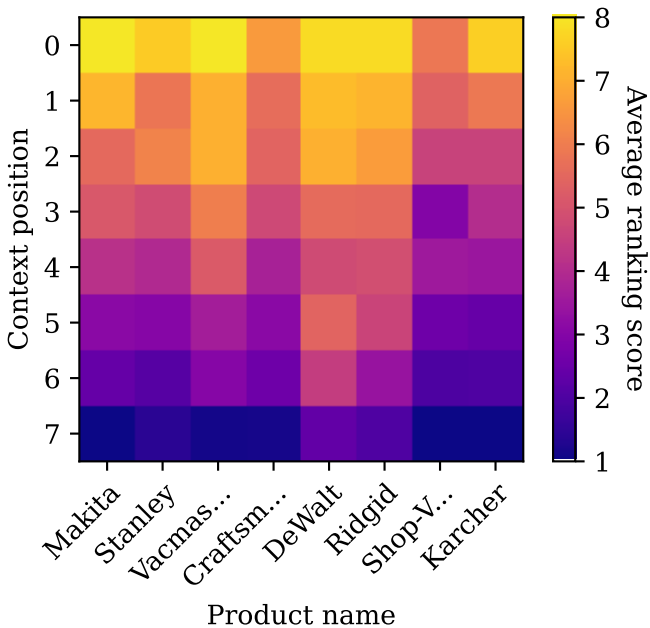

Supplement: software [file 2024.emnlp-main.534.software.zip]

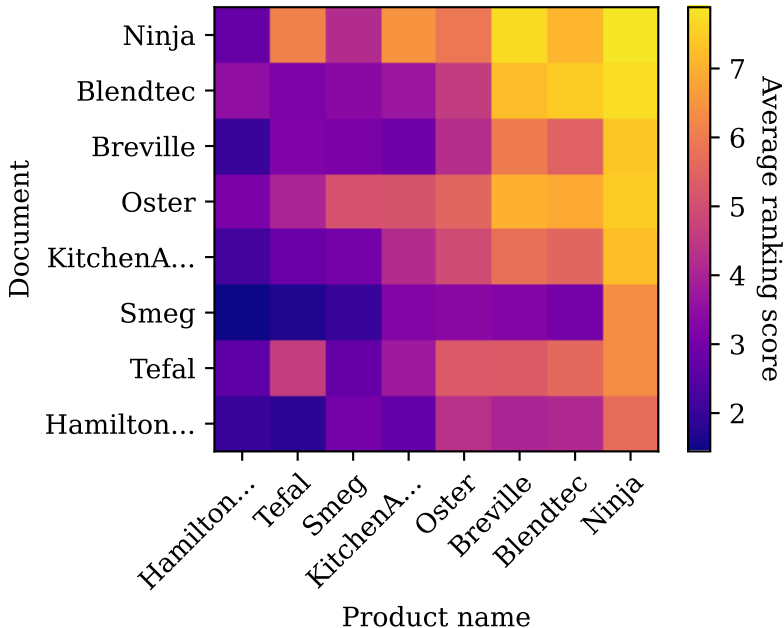

Supplement: software [file 2024.emnlp-main.534.software.zip]

Product name

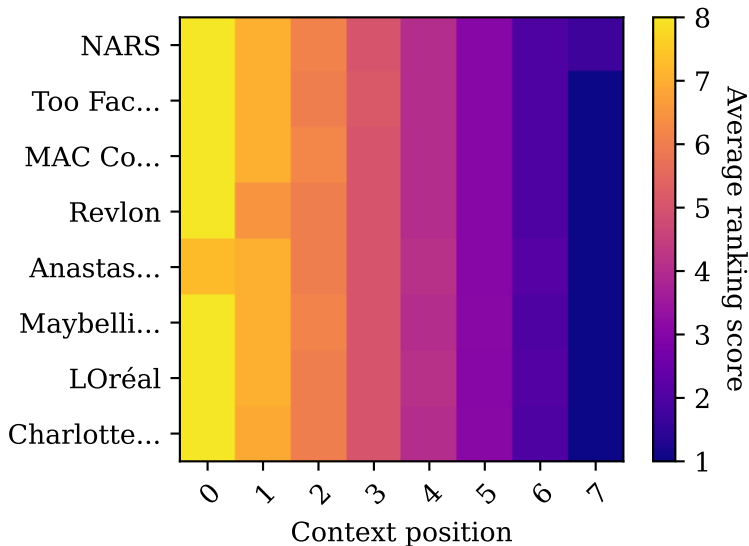

Supplement: software [file 2024.emnlp-main.534.software.zip]

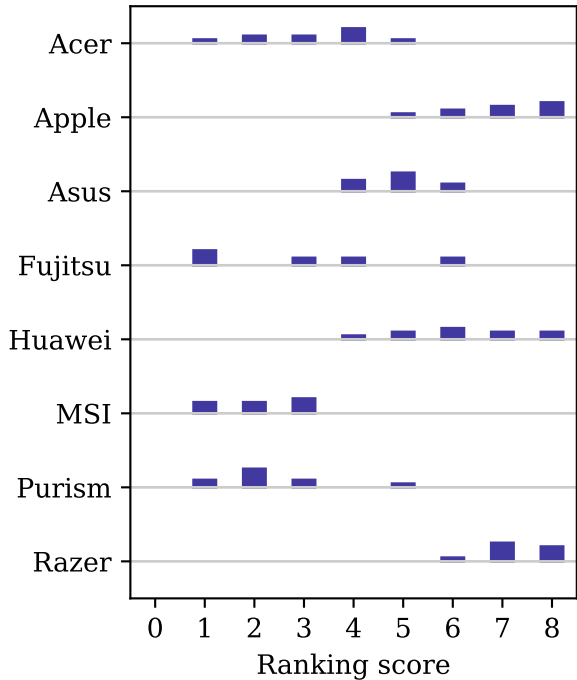

Supplement: software [file 2024.emnlp-main.534.software.zip]

Product name

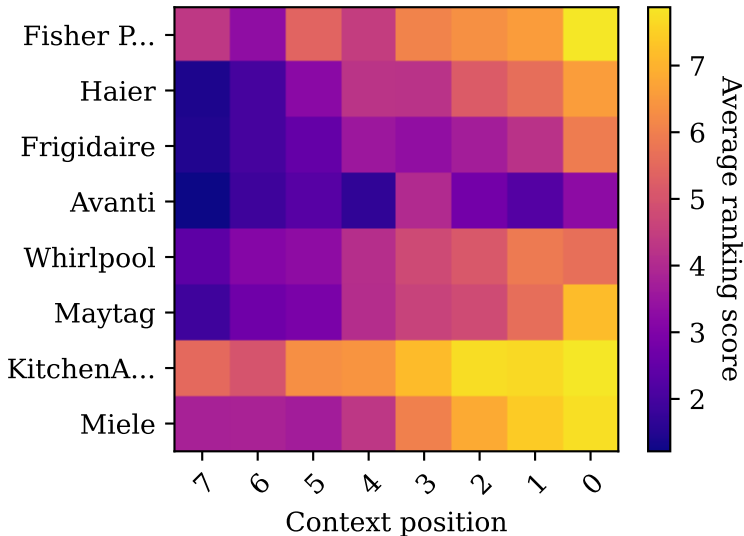

Supplement: software [file 2024.emnlp-main.534.software.zip]

Document

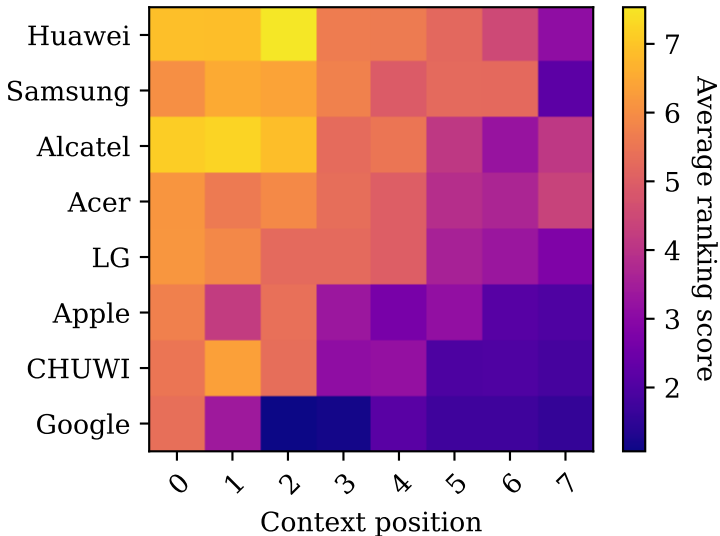

Supplement: software [file 2024.emnlp-main.534.software.zip]

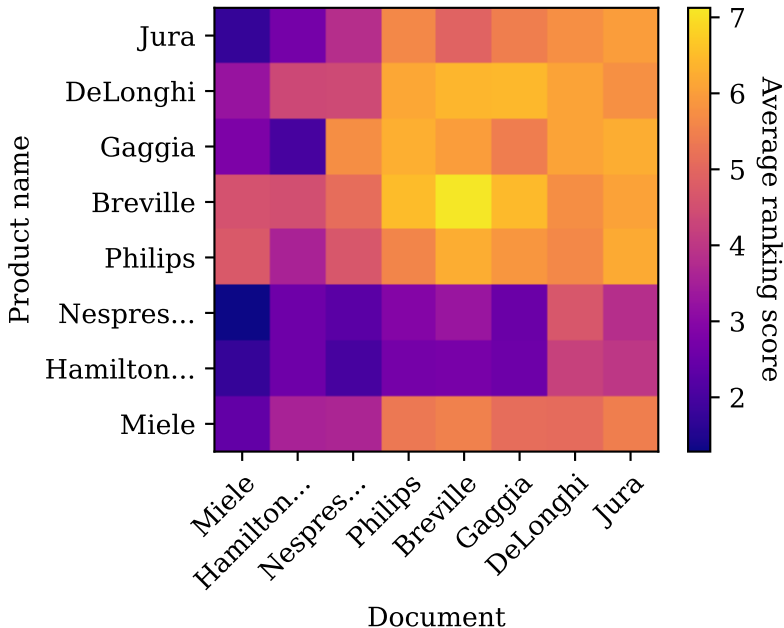

Supplement: software [file 2024.emnlp-main.534.software.zip]

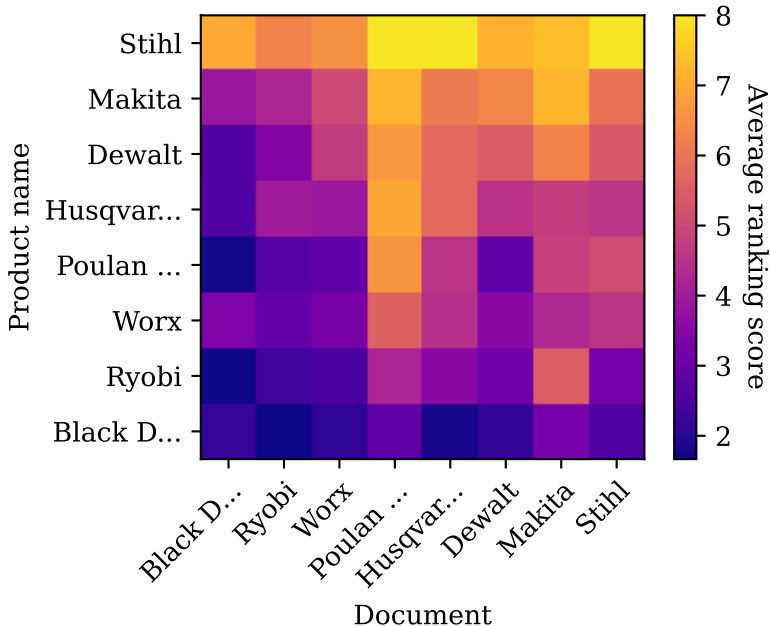

Supplement: software [file 2024.emnlp-main.534.software.zip]

Document

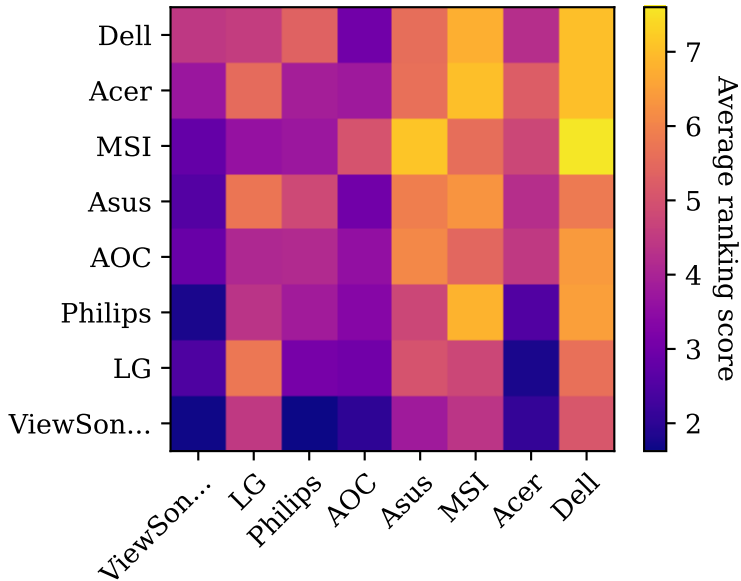

Product name

Supplement: software [file 2024.emnlp-main.534.software.zip]

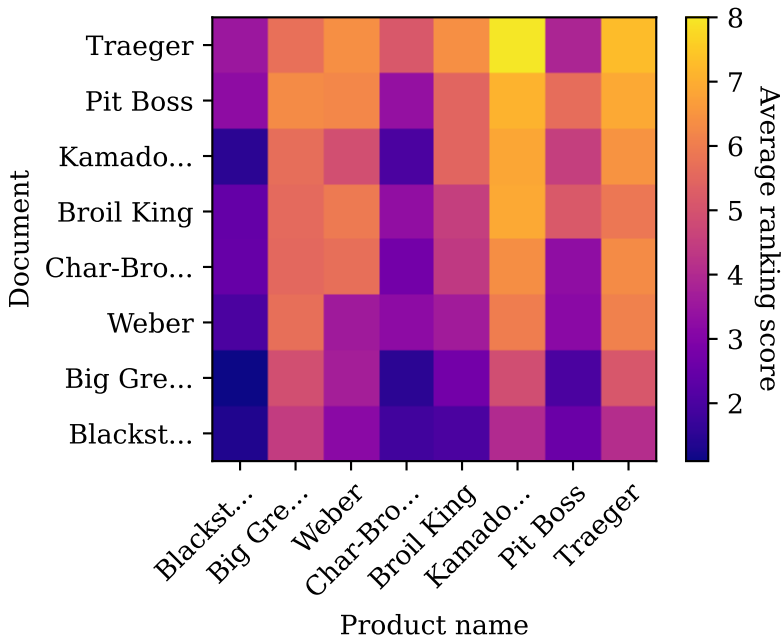

Supplement: software [file 2024.emnlp-main.534.software.zip]

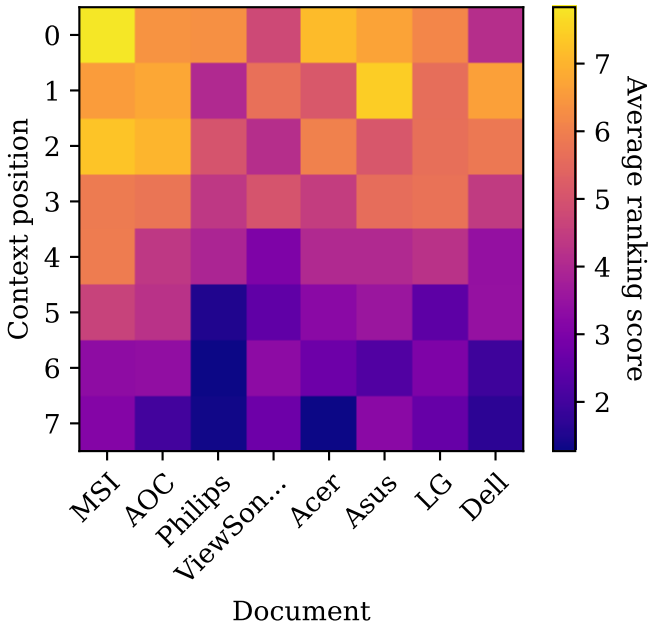

Supplement: software [file 2024.emnlp-main.534.software.zip]

Product name

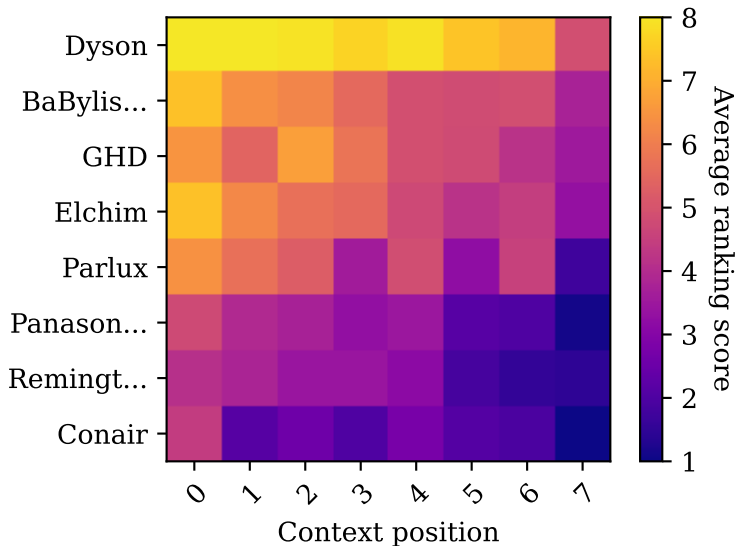

Supplement: software [file 2024.emnlp-main.534.software.zip]

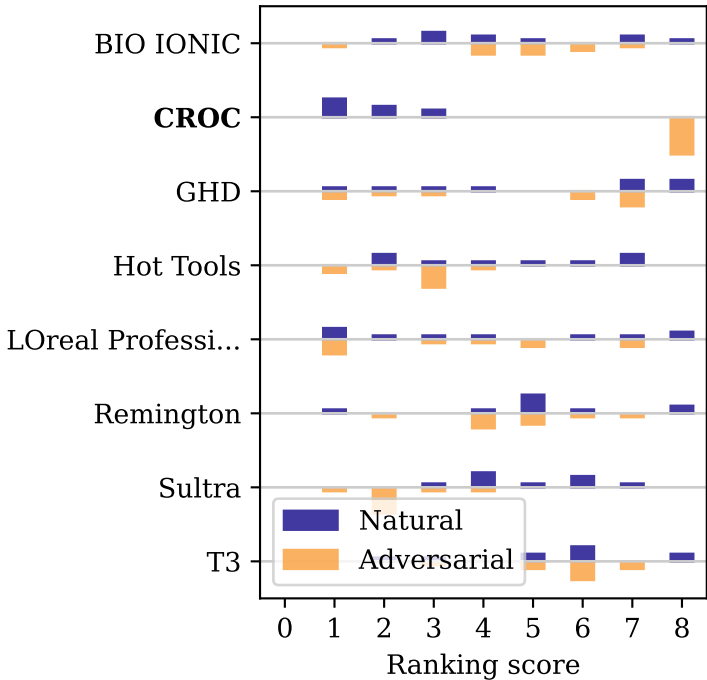

Supplement: software [file 2024.emnlp-main.534.software.zip]

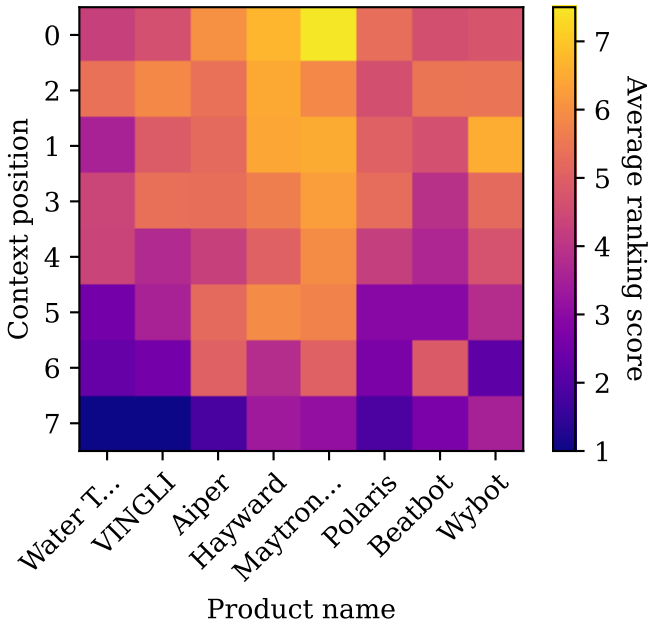

Supplement: software [file 2024.emnlp-main.534.software.zip]

Context position

0  
1  
2  
3  
4  
5  
6  
7

MSI  
AOC  
Philips  
ViewSon...  
Acer  
Asus  
LG  
Dell

Document

Average ranking score

7  
6  
5  
4  
3  
2

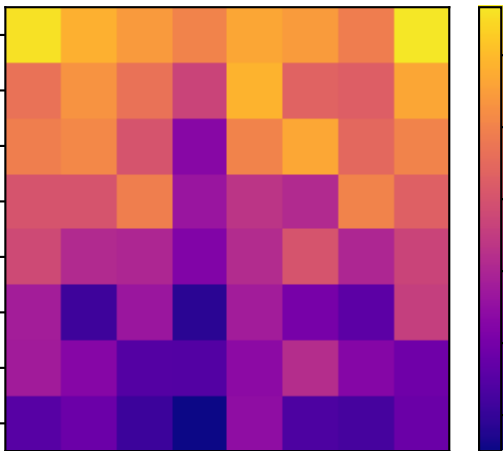

Supplement: software [file 2024.emnlp-main.534.software.zip]

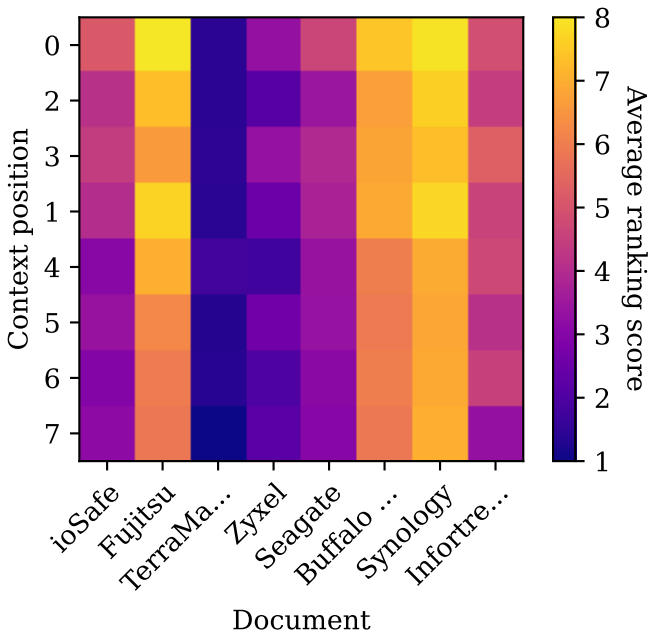

Supplement: software [file 2024.emnlp-main.534.software.zip]

Document

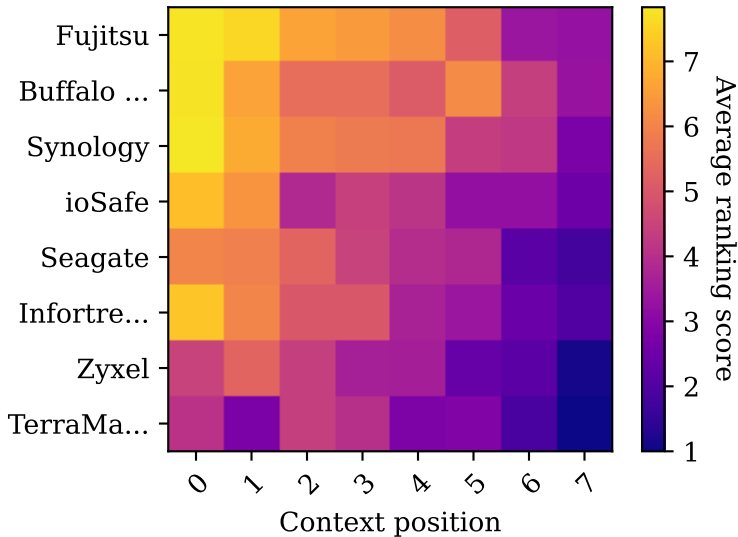

Supplement: software [file 2024.emnlp-main.534.software.zip]

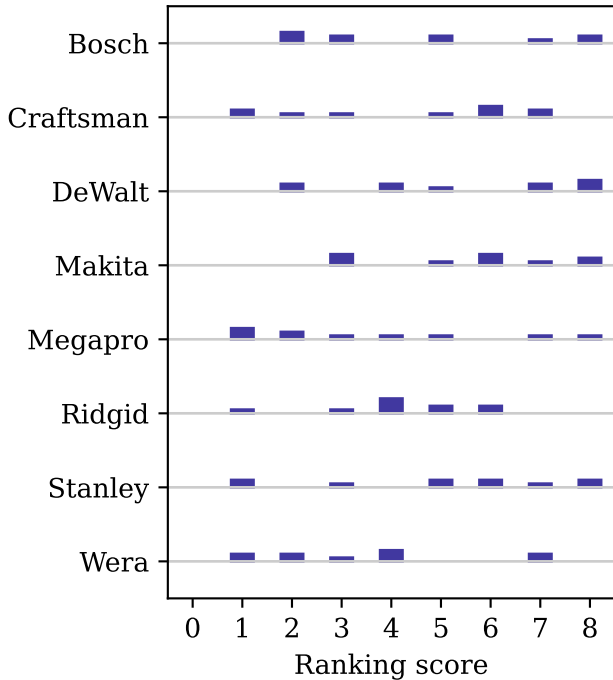

Supplement: software [file 2024.emnlp-main.534.software.zip]

Product name

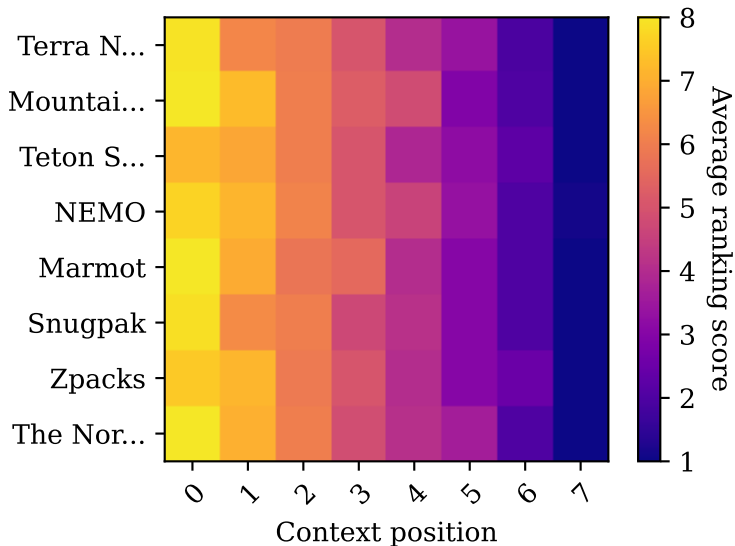

Supplement: software [file 2024.emnlp-main.534.software.zip]

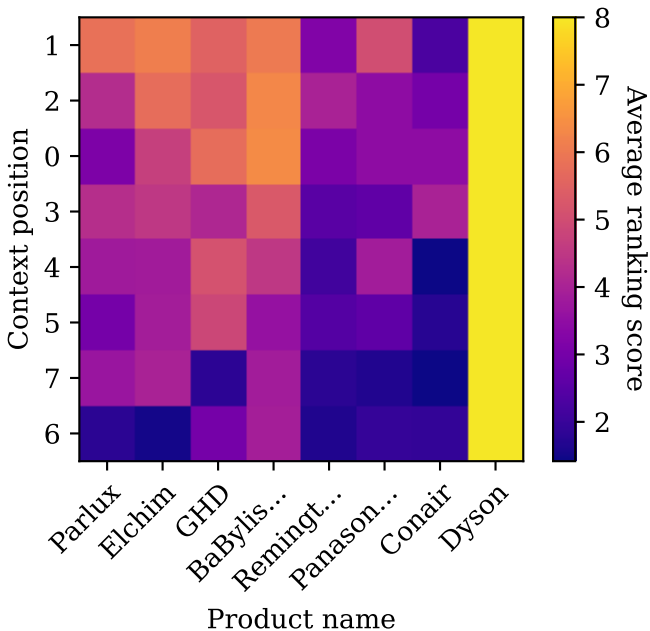

Supplement: software [file 2024.emnlp-main.534.software.zip]

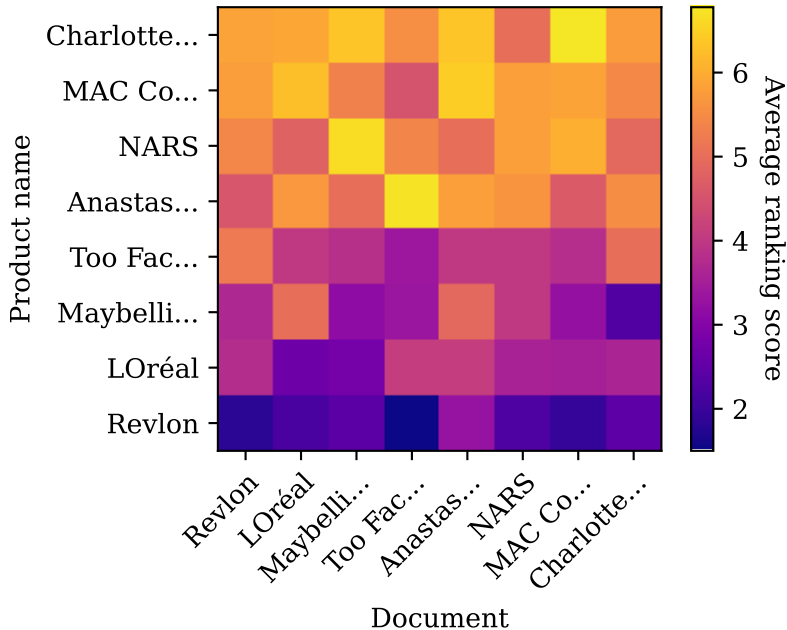

Supplement: software [file 2024.emnlp-main.534.software.zip]

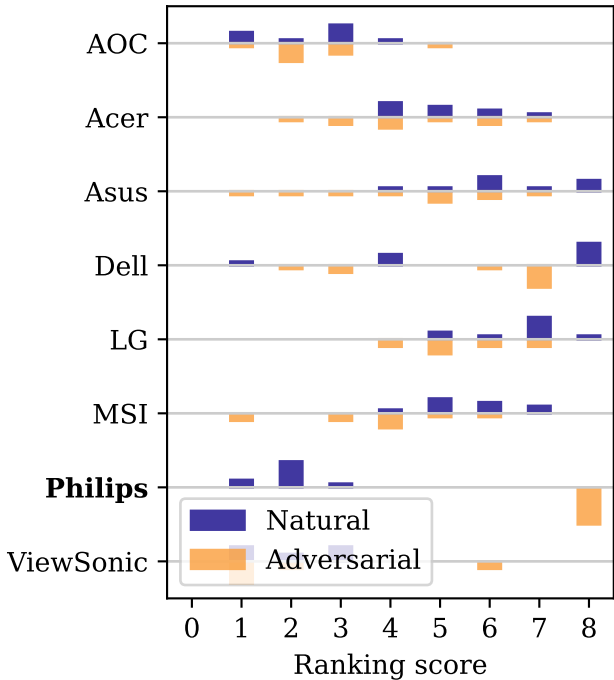

Supplement: software [file 2024.emnlp-main.534.software.zip]

Context position

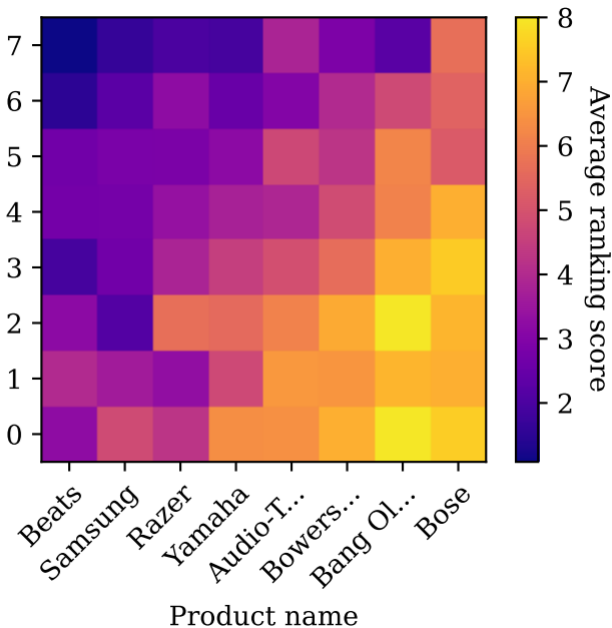

Supplement: software [file 2024.emnlp-main.534.software.zip]

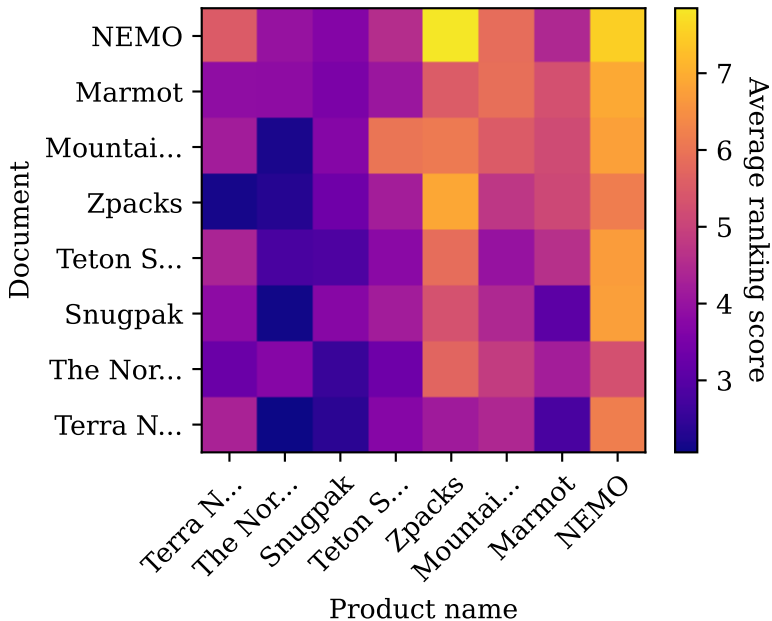

Supplement: software [file 2024.emnlp-main.534.software.zip]

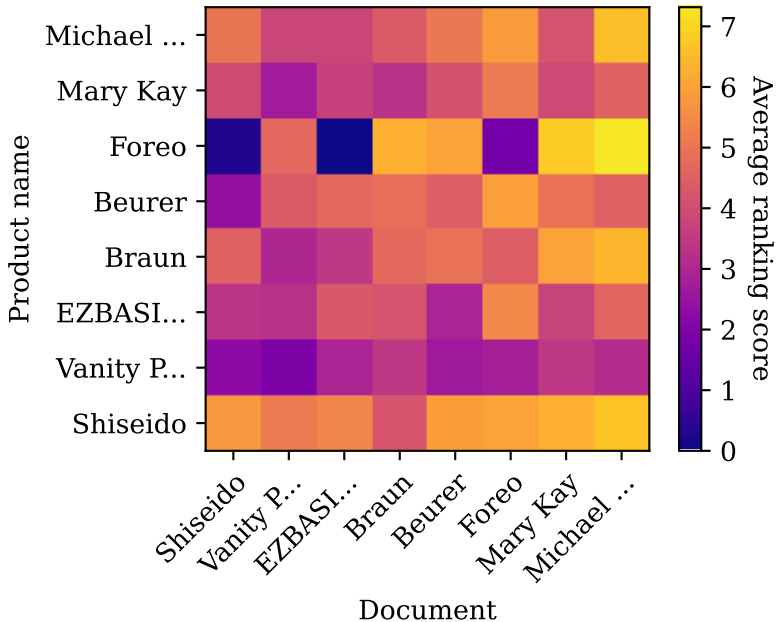

Supplement: software [file 2024.emnlp-main.534.software.zip]

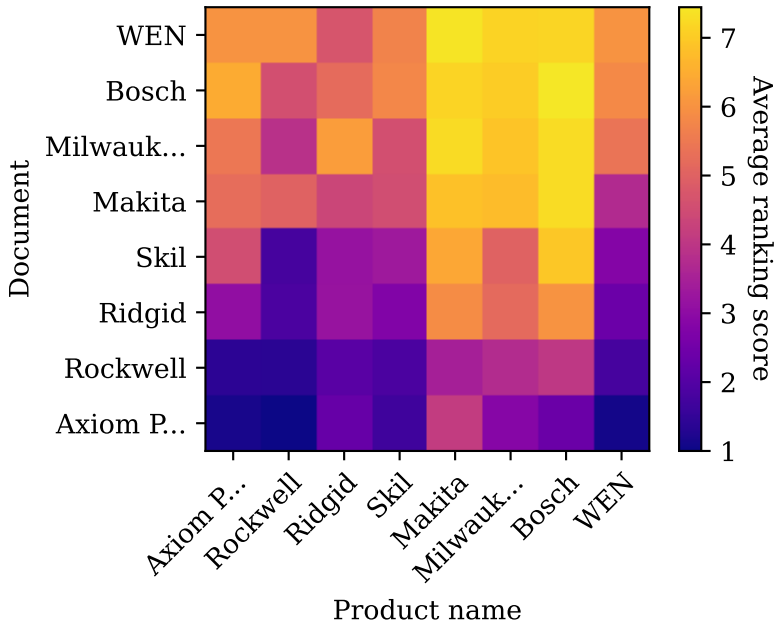

Supplement: software [file 2024.emnlp-main.534.software.zip]

Document

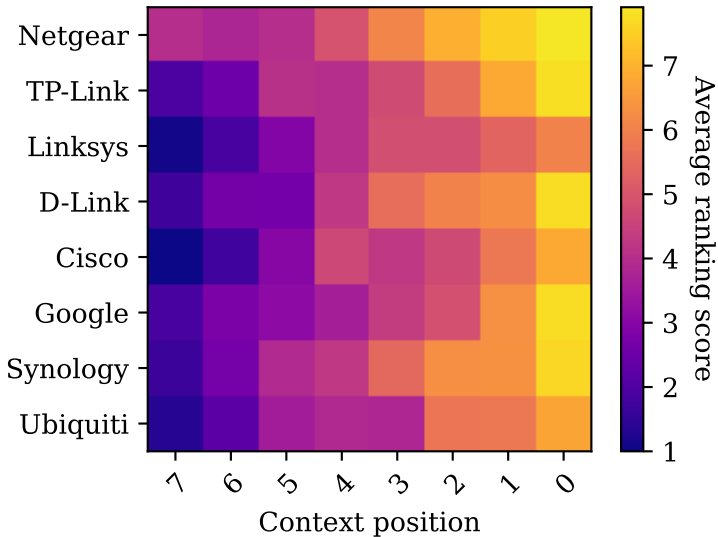

Supplement: software [file 2024.emnlp-main.534.software.zip]

Context position

7  
6  
5  
4  
3  
2  
1  
0

Black D...  
Ryobi  
Worx  
Poulan ...  
Husqvar...  
Dewalt  
Makita  
Stihl

Product name

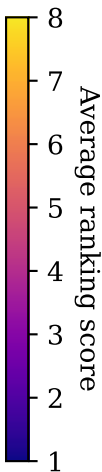

Supplement: software [file 2024.emnlp-main.534.software.zip]

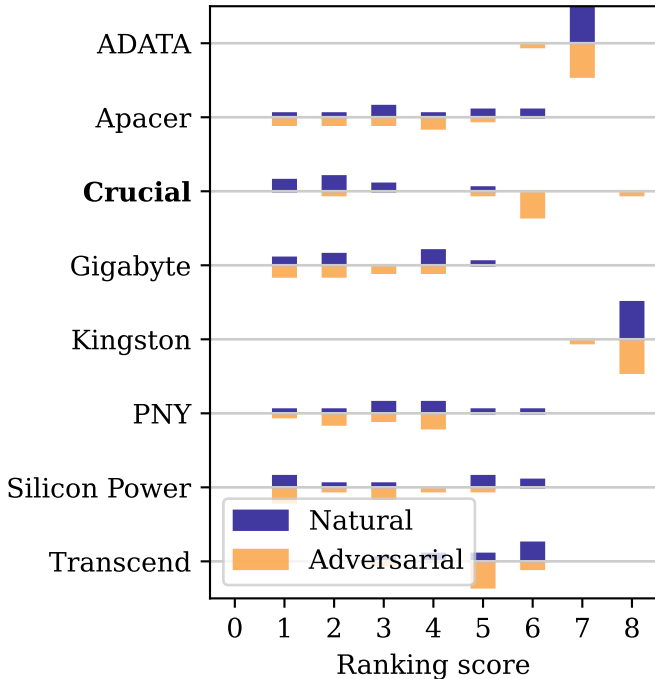

Supplement: software [file 2024.emnlp-main.534.software.zip]

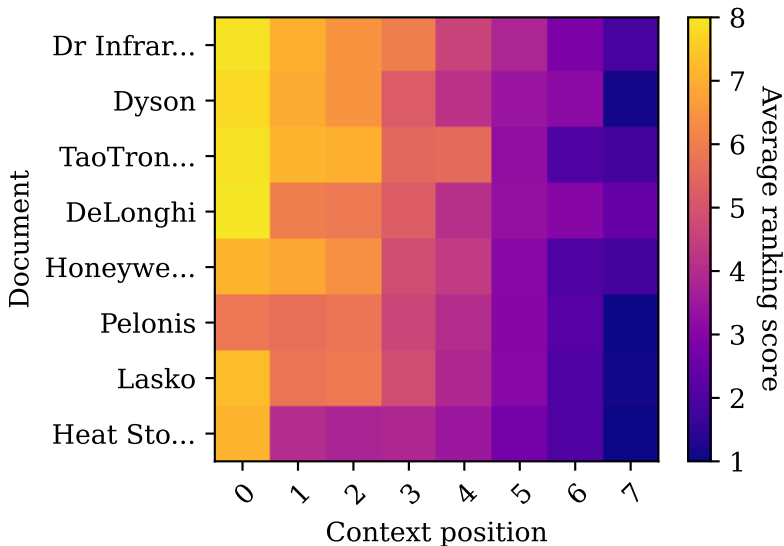

Supplement: software [file 2024.emnlp-main.534.software.zip]

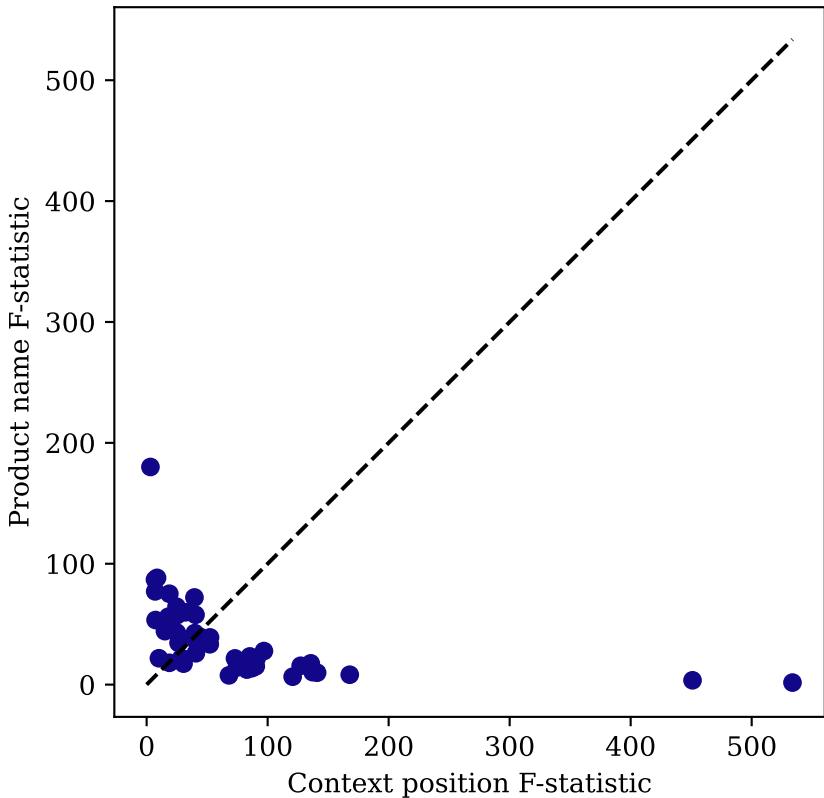

Supplement: software [file 2024.emnlp-main.534.software.zip]

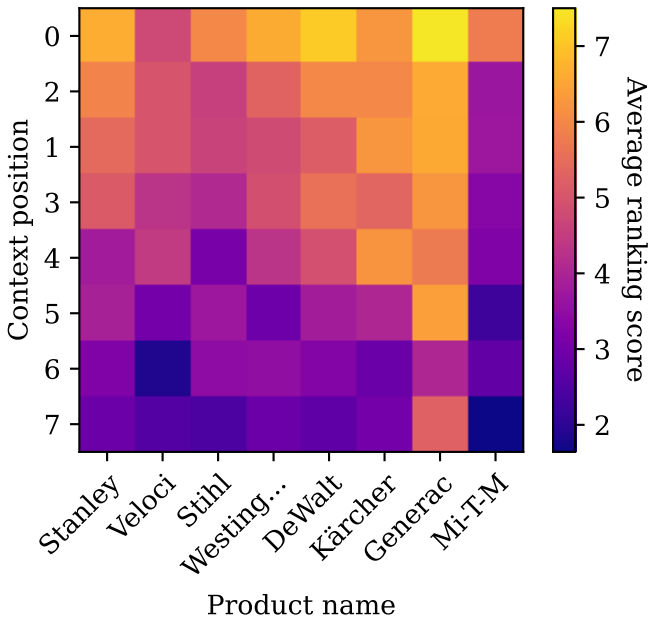

Supplement: software [file 2024.emnlp-main.534.software.zip]

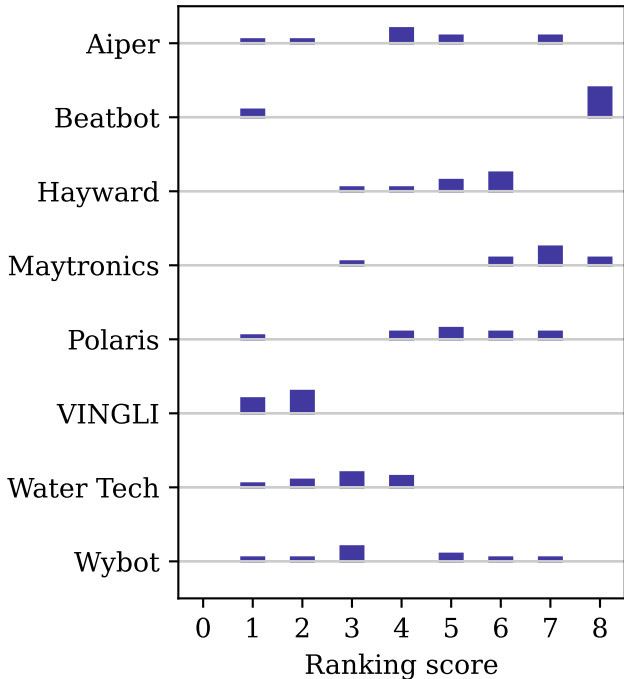

Supplement: software [file 2024.emnlp-main.534.software.zip]

Product name

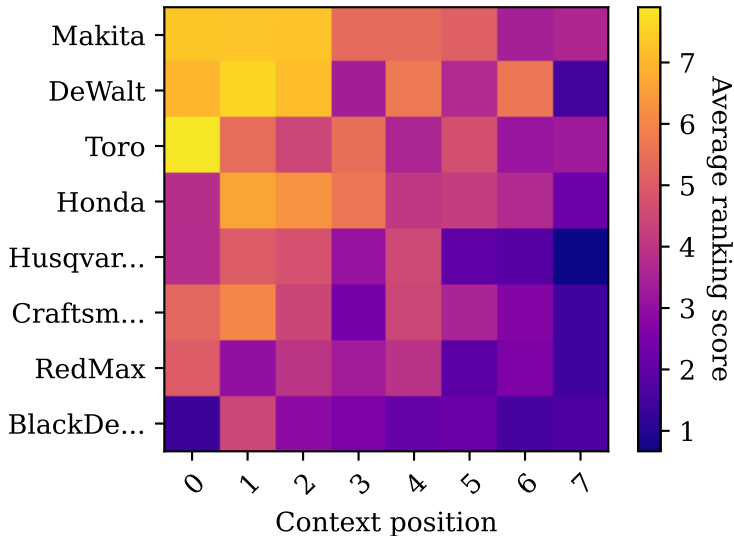

Supplement: software [file 2024.emnlp-main.534.software.zip]

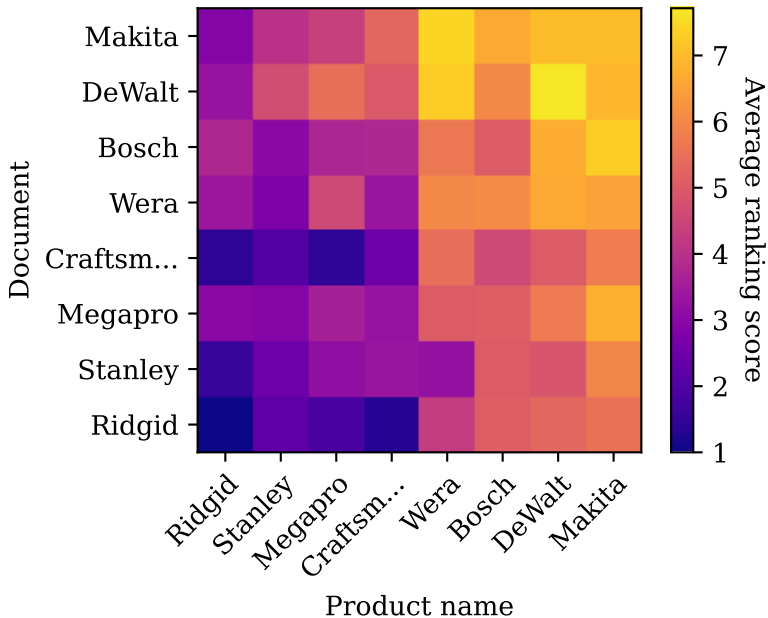

Supplement: software [file 2024.emnlp-main.534.software.zip]

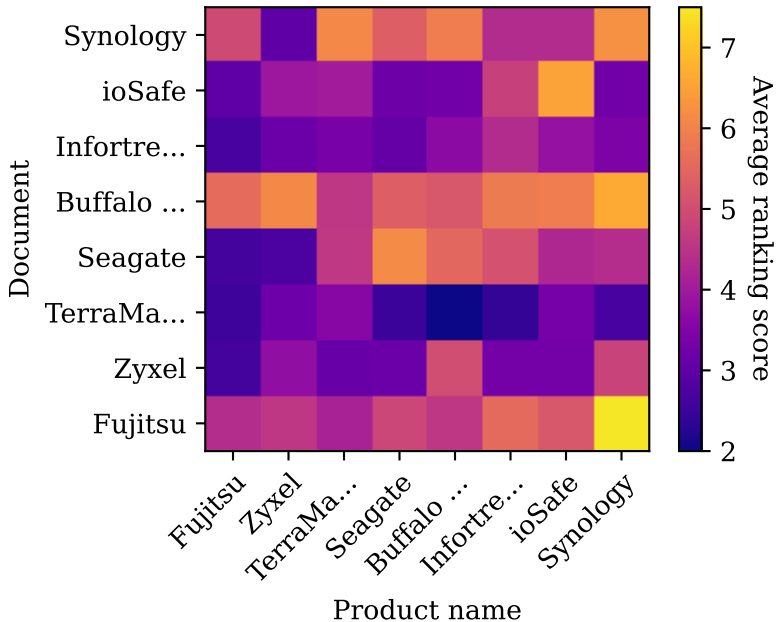

Supplement: software [file 2024.emnlp-main.534.software.zip]

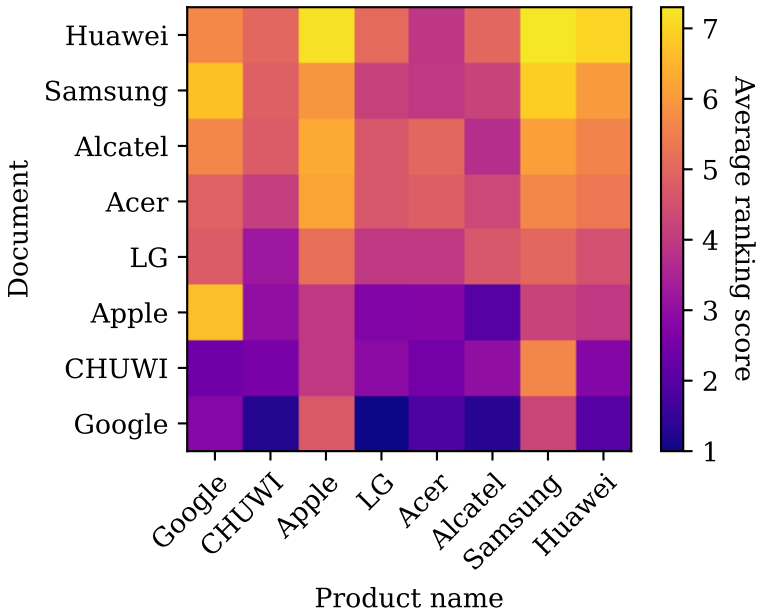

Supplement: software [file 2024.emnlp-main.534.software.zip]

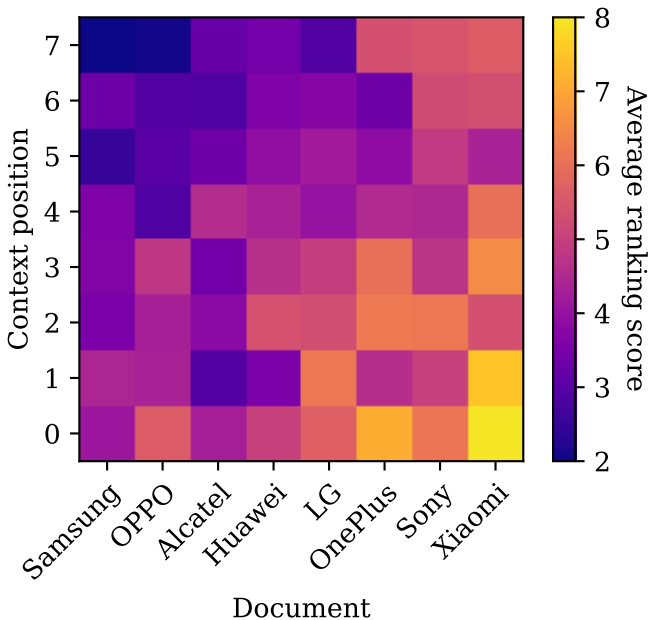

Supplement: software [file 2024.emnlp-main.534.software.zip]

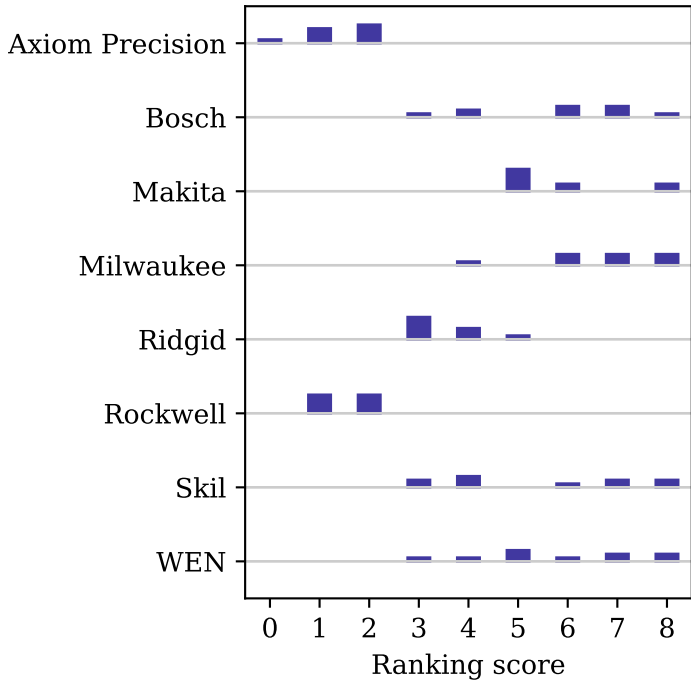

Supplement: software [file 2024.emnlp-main.534.software.zip]

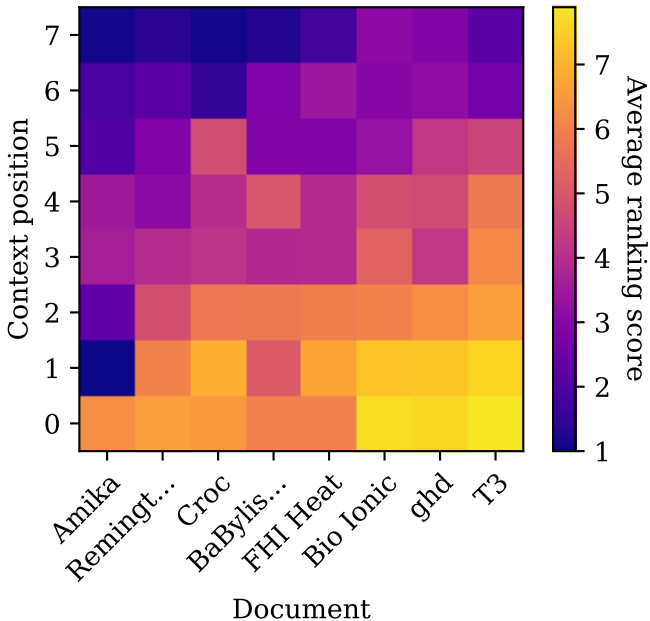

Supplement: software [file 2024.emnlp-main.534.software.zip]

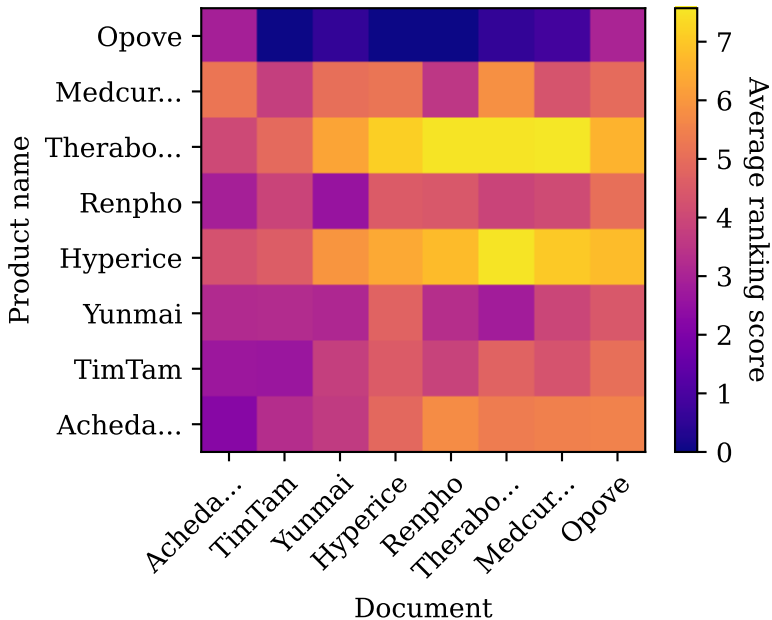

Supplement: software [file 2024.emnlp-main.534.software.zip]

Document

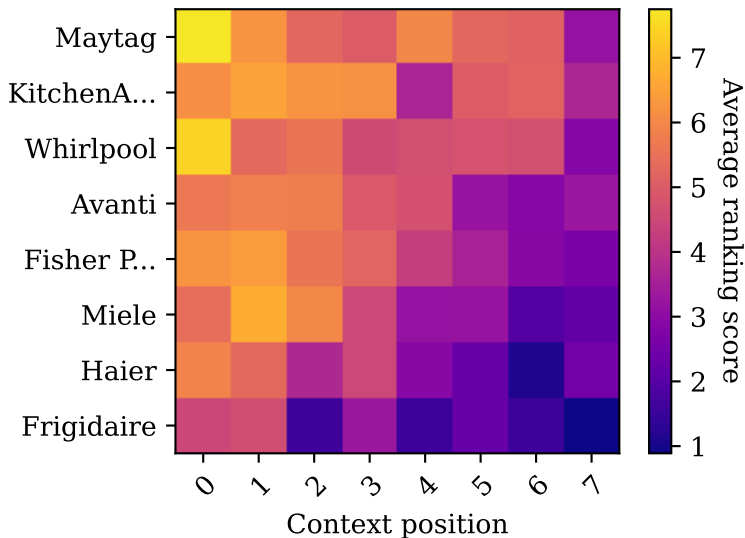

Supplement: software [file 2024.emnlp-main.534.software.zip]

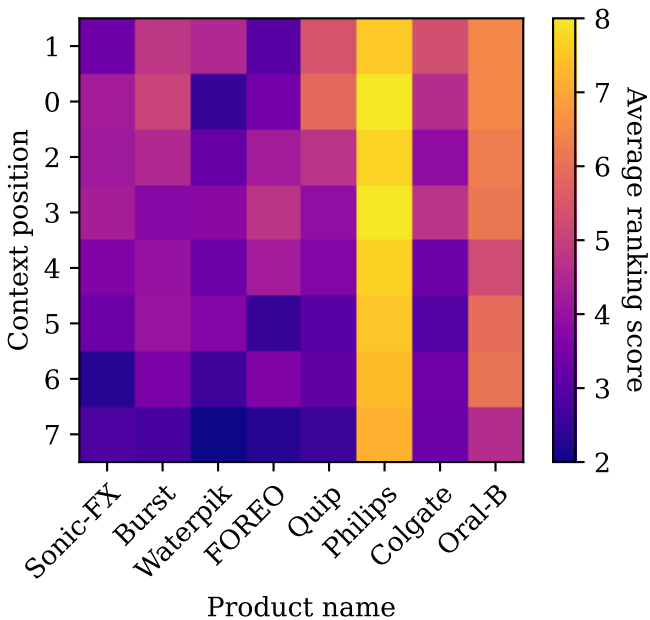

Supplement: software [file 2024.emnlp-main.534.software.zip]

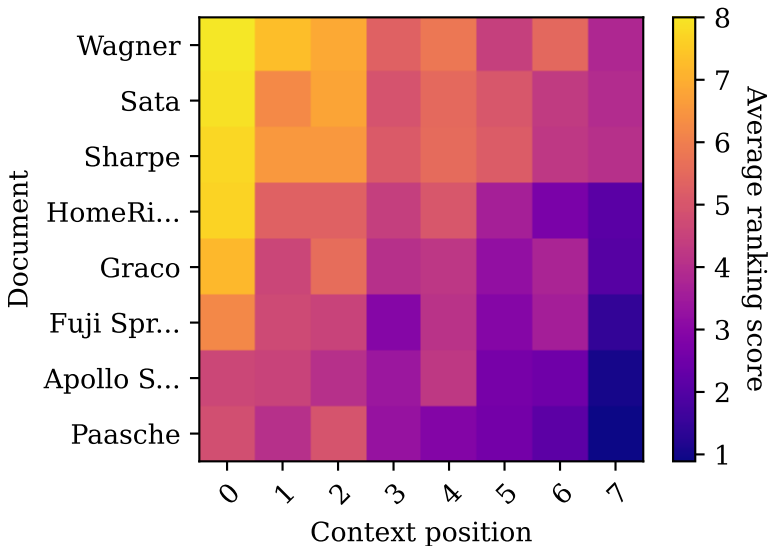

Supplement: software [file 2024.emnlp-main.534.software.zip]

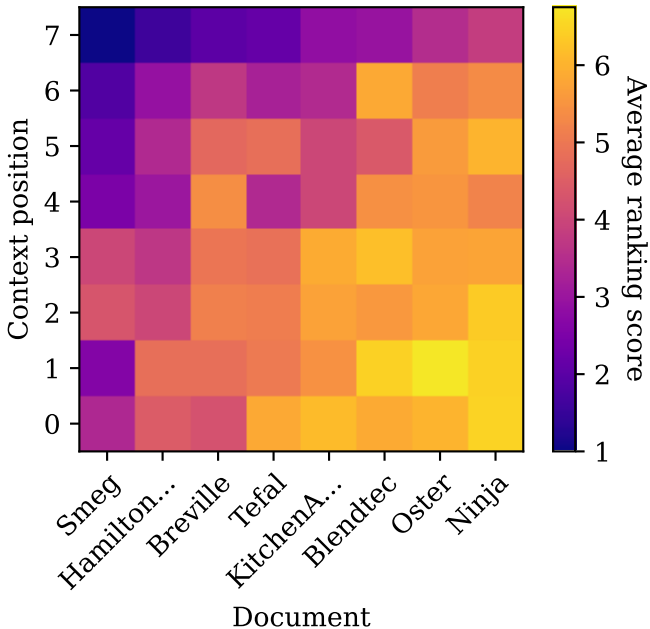

Supplement: software [file 2024.emnlp-main.534.software.zip]

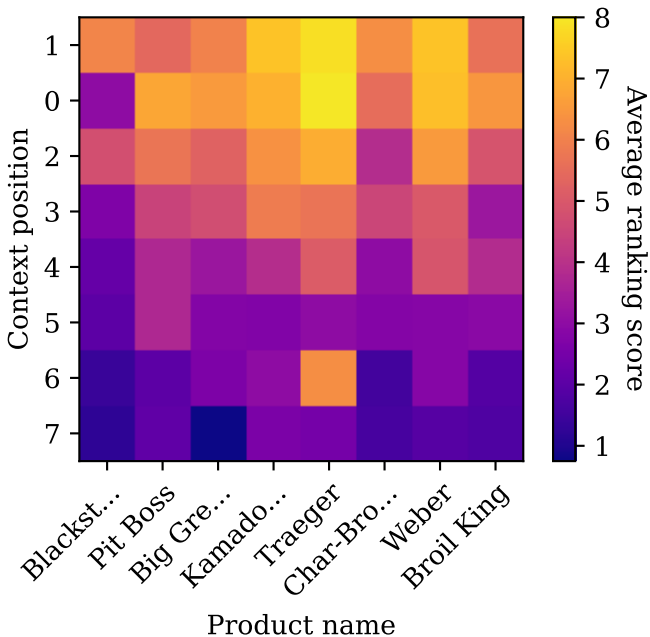

Supplement: software [file 2024.emnlp-main.534.software.zip]

Product name

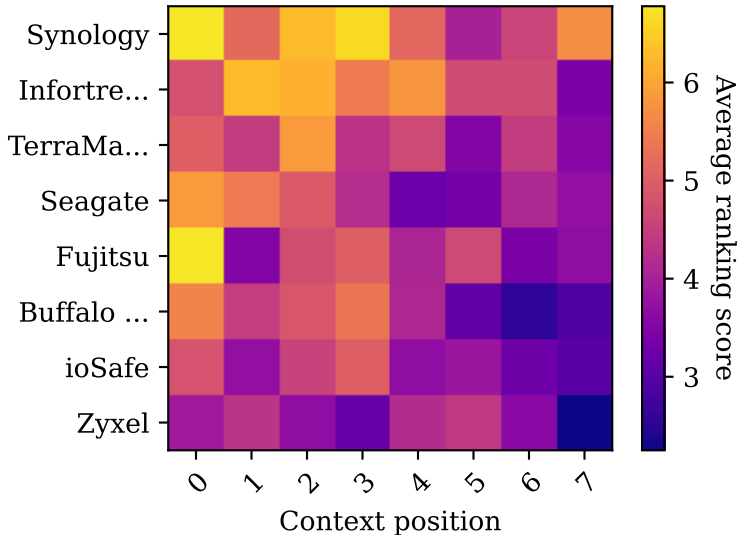

Supplement: software [file 2024.emnlp-main.534.software.zip]

Product name

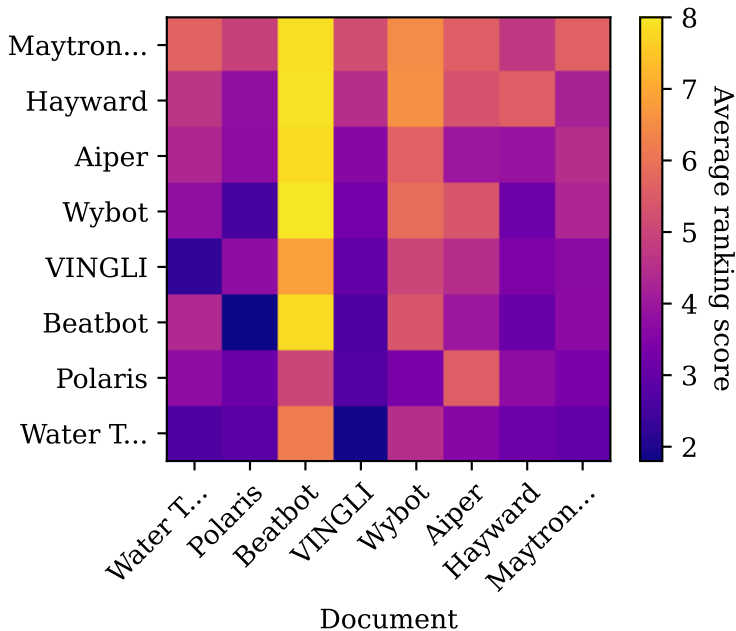

Supplement: software [file 2024.emnlp-main.534.software.zip]

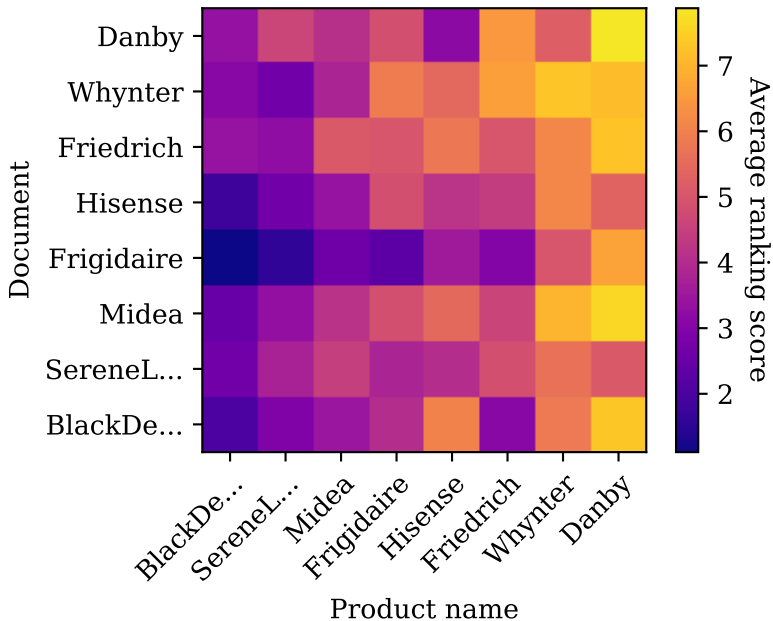

Supplement: software [file 2024.emnlp-main.534.software.zip]

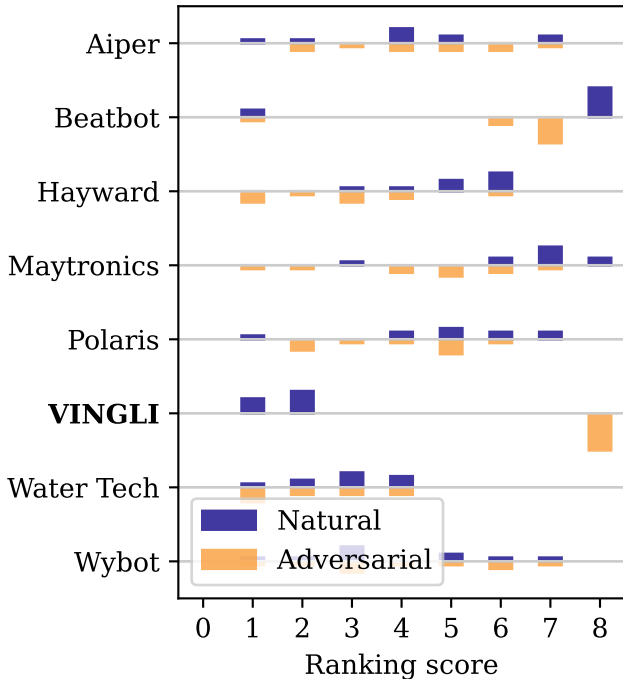

Supplement: software [file 2024.emnlp-main.534.software.zip]

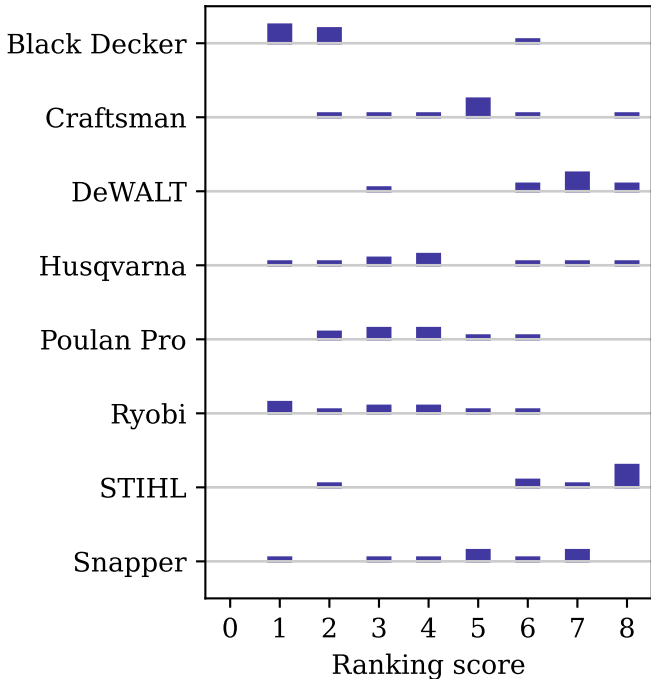

Supplement: software [file 2024.emnlp-main.534.software.zip]

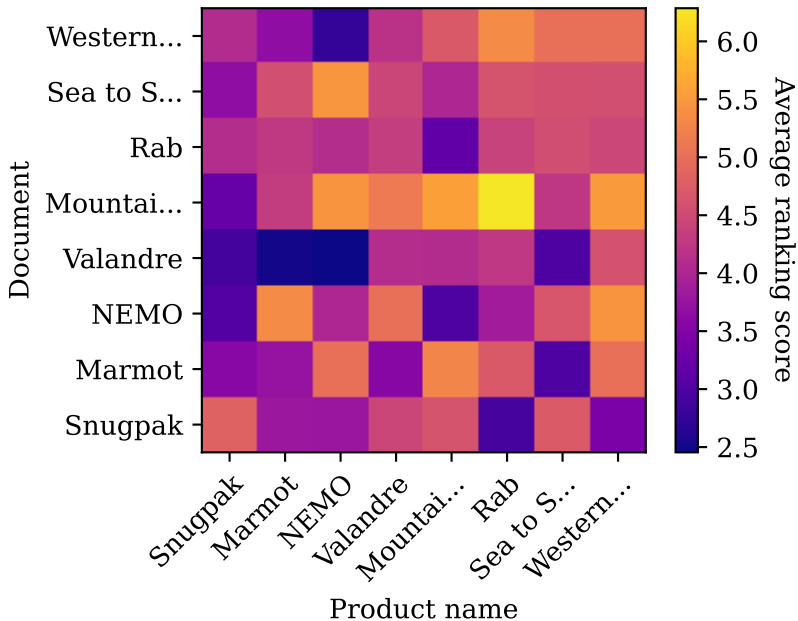

Supplement: software [file 2024.emnlp-main.534.software.zip]

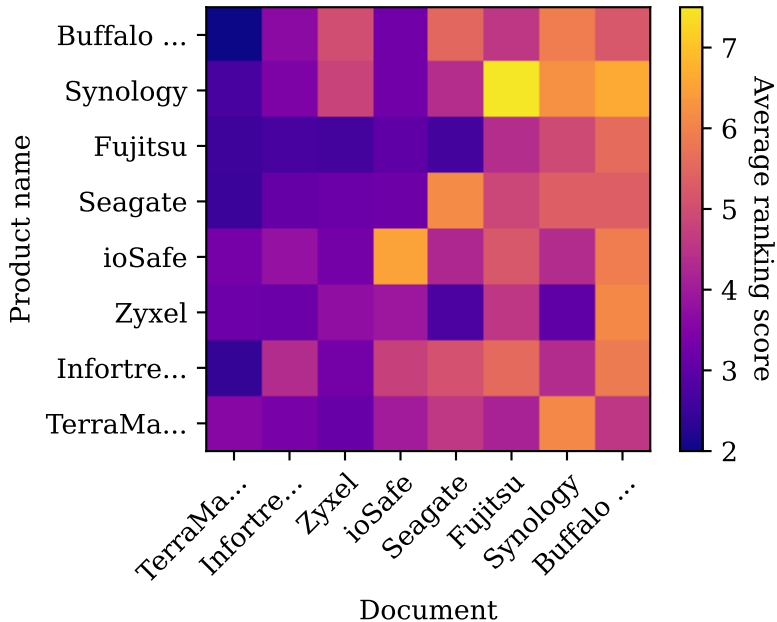

Supplement: software [file 2024.emnlp-main.534.software.zip]

Product name

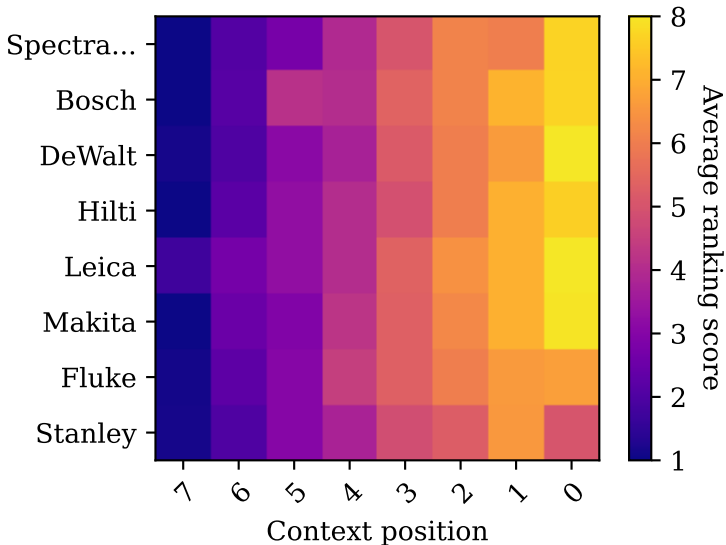

Supplement: software [file 2024.emnlp-main.534.software.zip]

Document

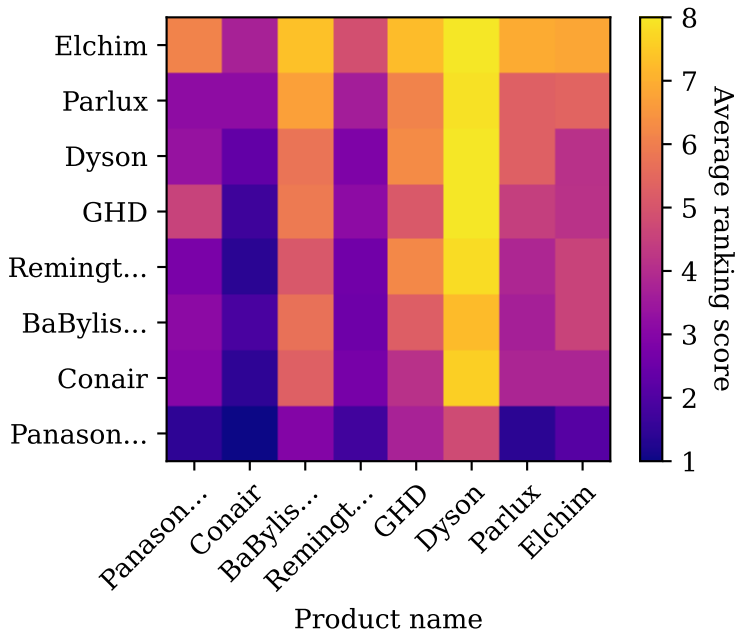

Supplement: software [file 2024.emnlp-main.534.software.zip]

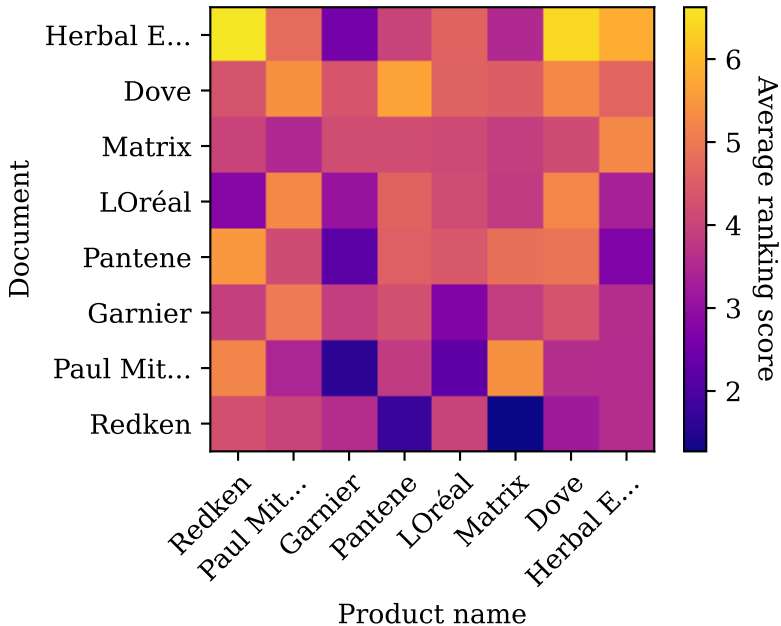

Supplement: software [file 2024.emnlp-main.534.software.zip]

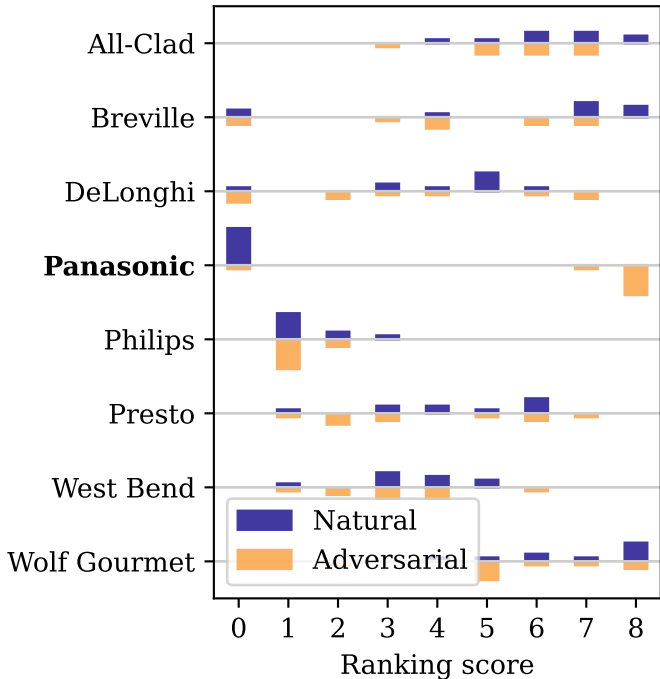

Supplement: software [file 2024.emnlp-main.534.software.zip]

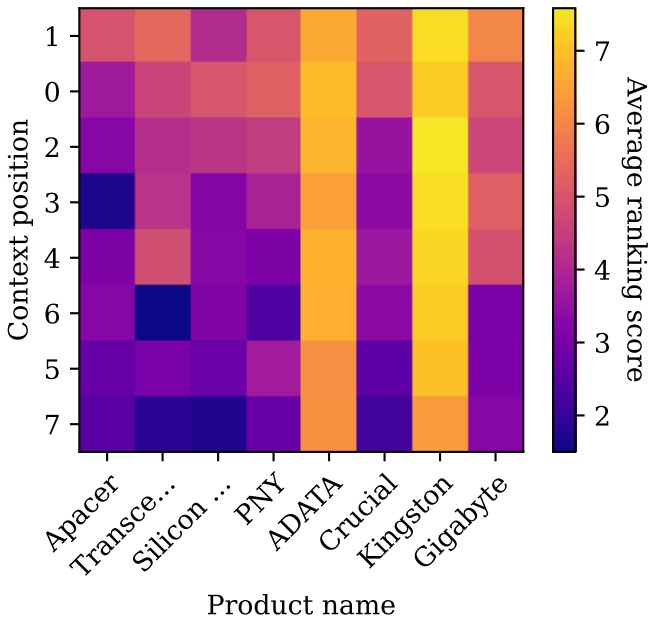

Supplement: software [file 2024.emnlp-main.534.software.zip]

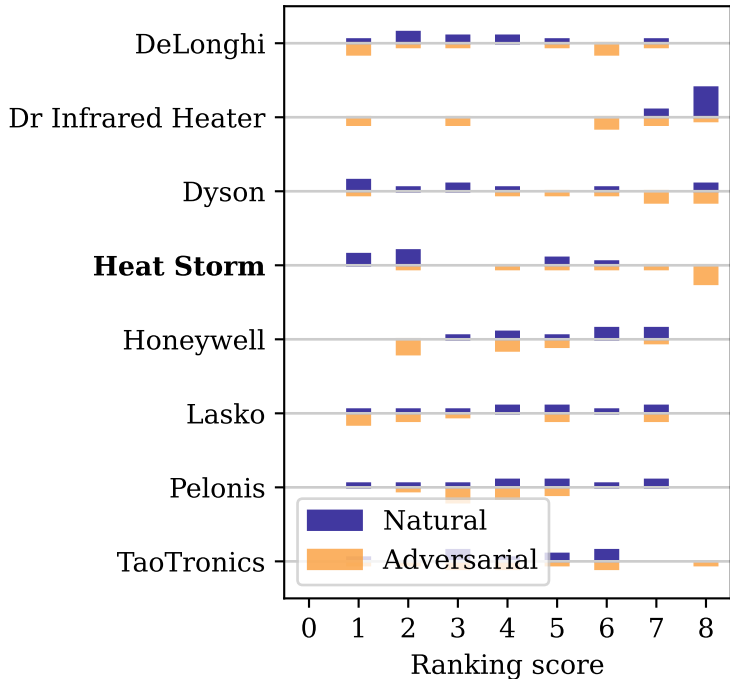

Supplement: software [file 2024.emnlp-main.534.software.zip]

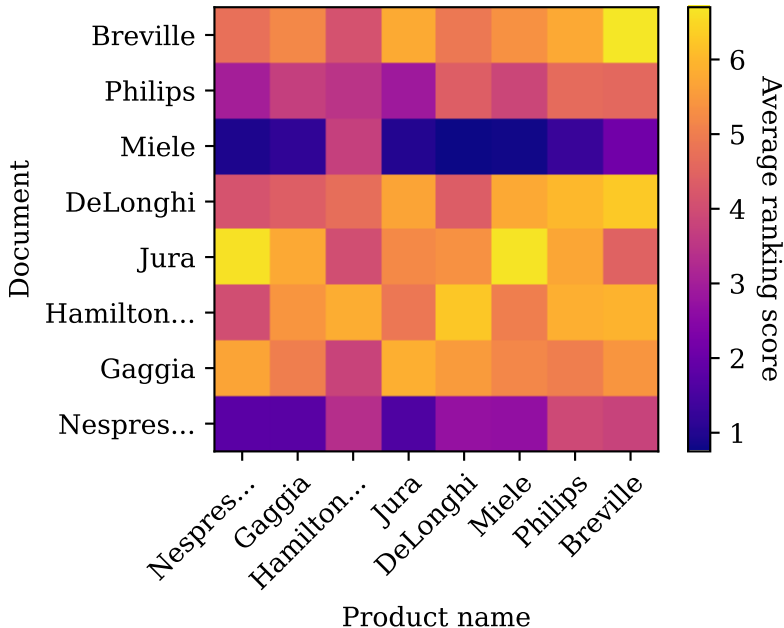

Supplement: software [file 2024.emnlp-main.534.software.zip]

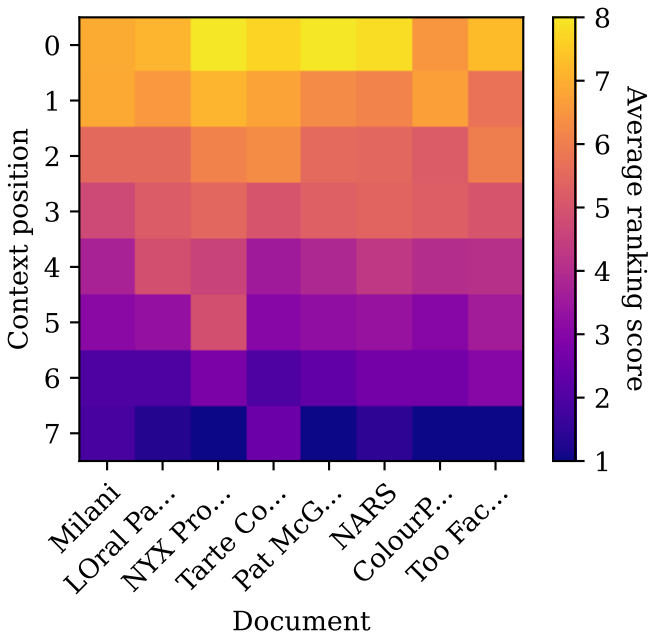

Supplement: software [file 2024.emnlp-main.534.software.zip]

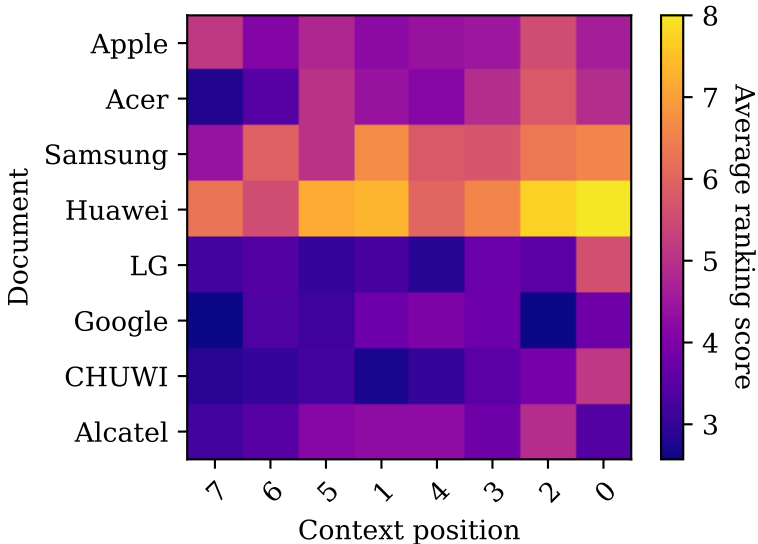

Supplement: software [file 2024.emnlp-main.534.software.zip]

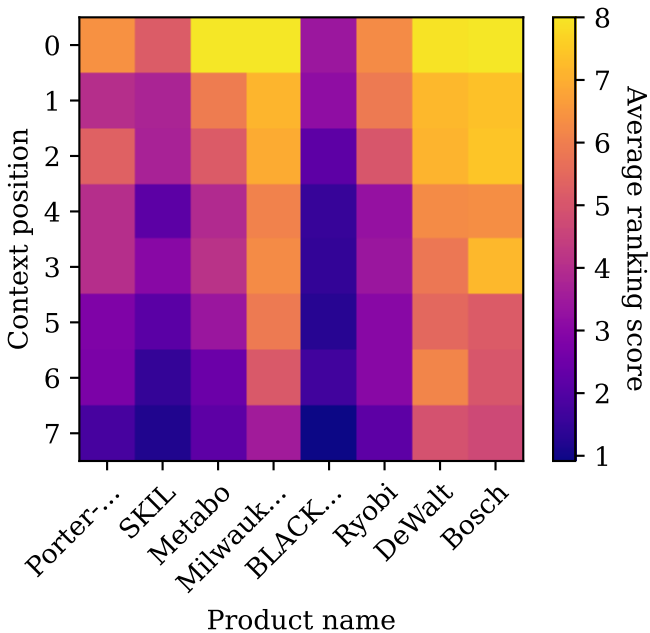

Supplement: software [file 2024.emnlp-main.534.software.zip]

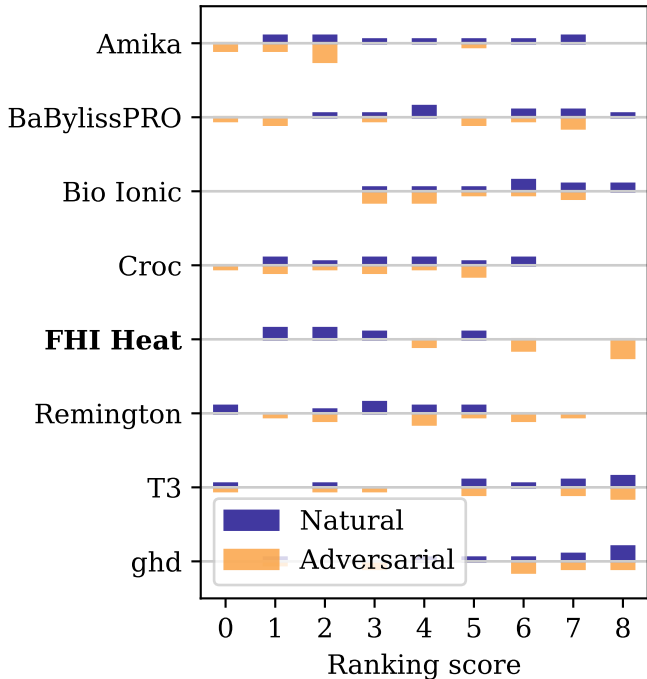

Supplement: software [file 2024.emnlp-main.534.software.zip]

Product name

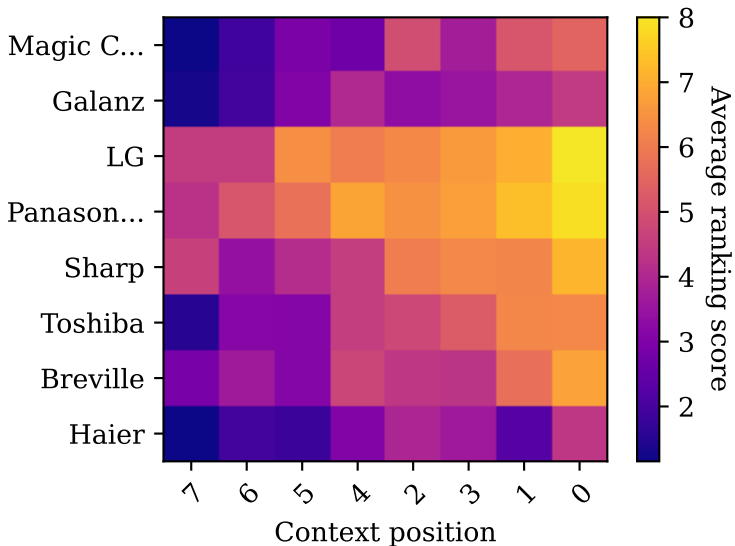

Supplement: software [file 2024.emnlp-main.534.software.zip]

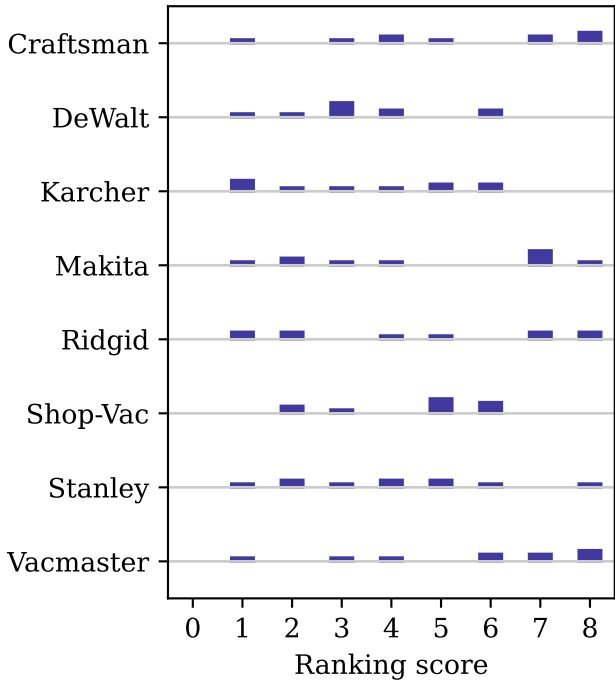

Supplement: software [file 2024.emnlp-main.534.software.zip]

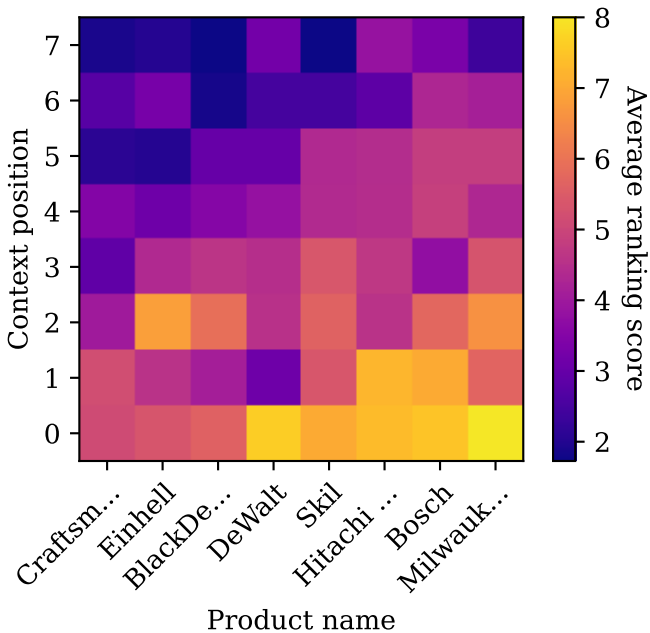

Supplement: software [file 2024.emnlp-main.534.software.zip]

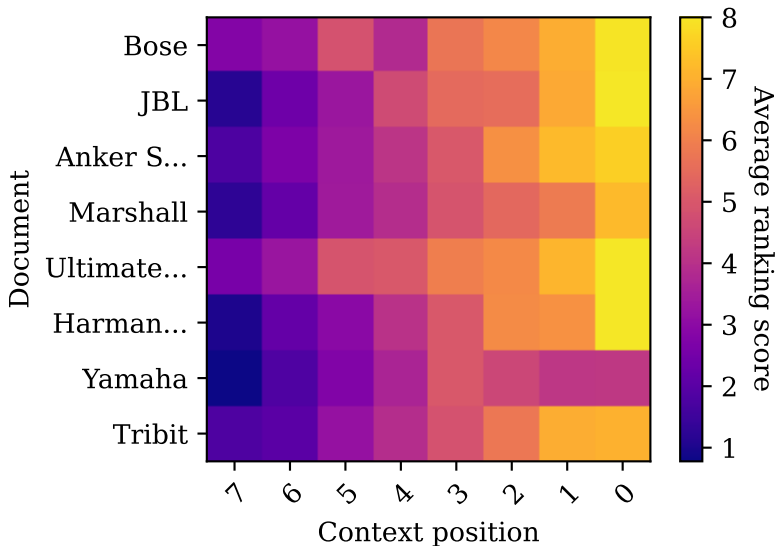

Supplement: software [file 2024.emnlp-main.534.software.zip]

Product name

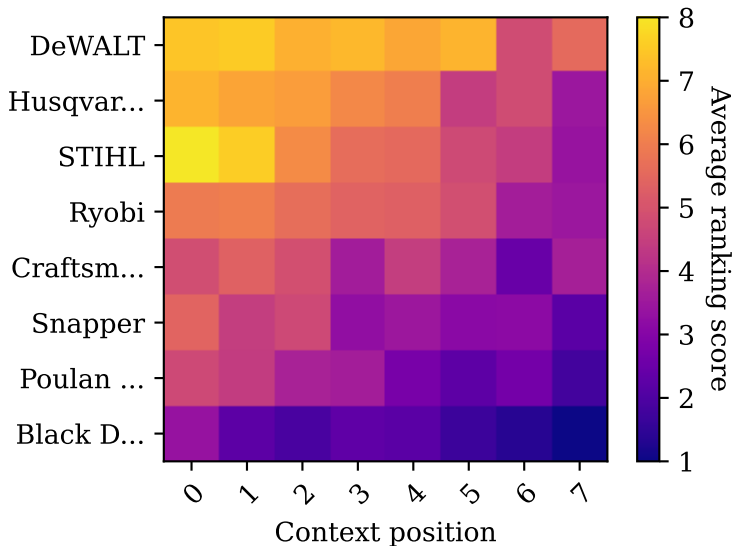

Supplement: software [file 2024.emnlp-main.534.software.zip]

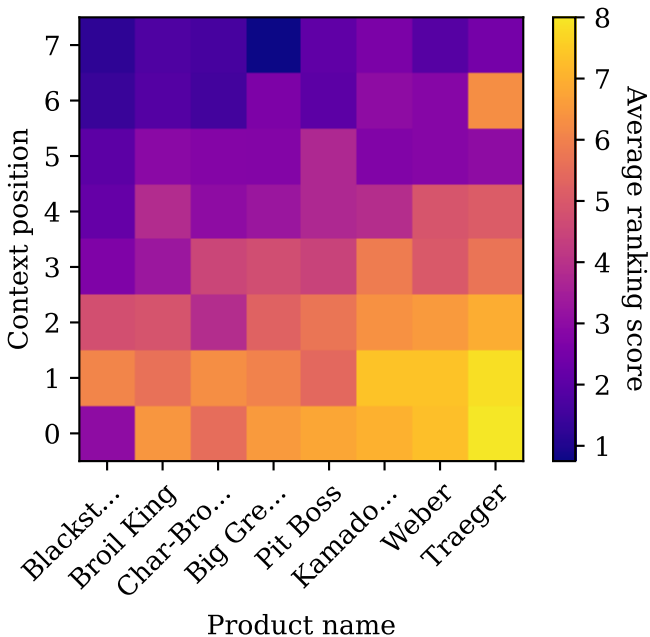

Supplement: software [file 2024.emnlp-main.534.software.zip]

Product name

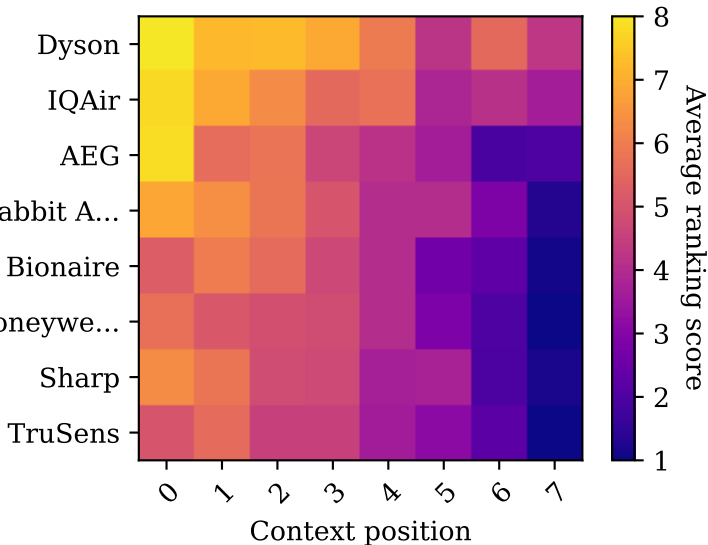

Supplement: software [file 2024.emnlp-main.534.software.zip]

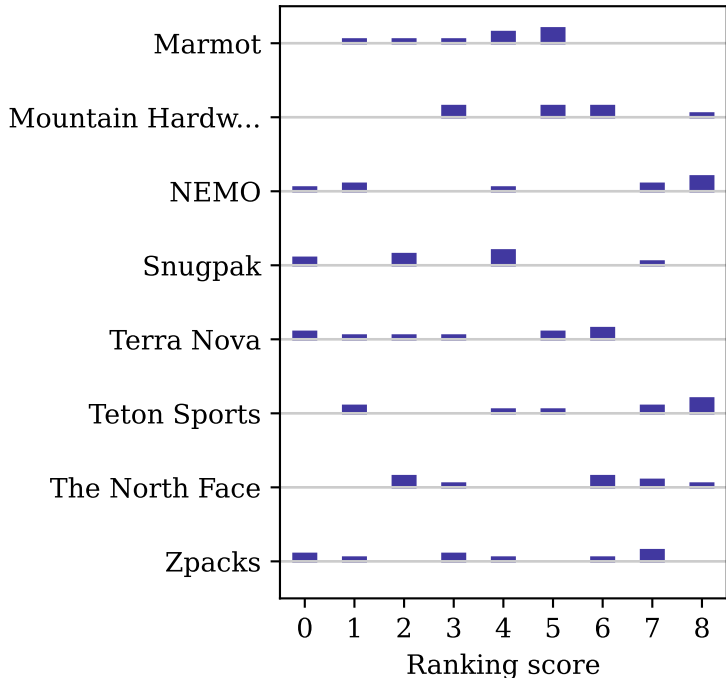

Supplement: software [file 2024.emnlp-main.534.software.zip]

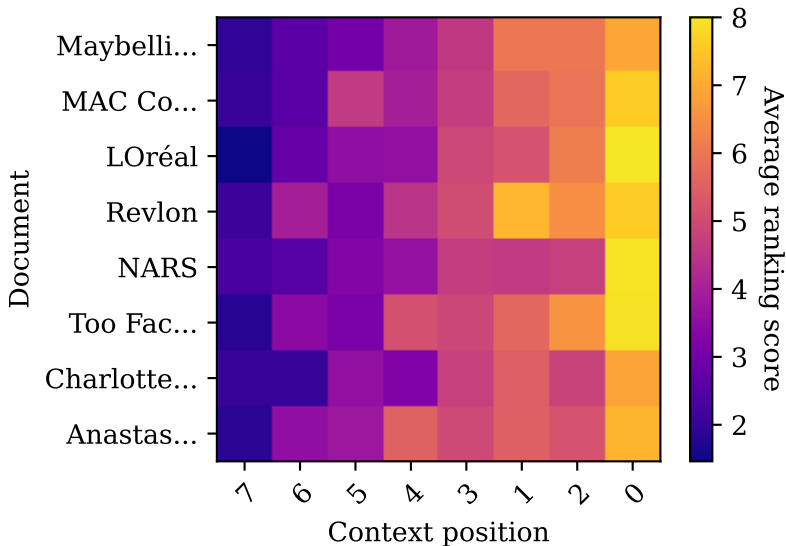

Supplement: software [file 2024.emnlp-main.534.software.zip]

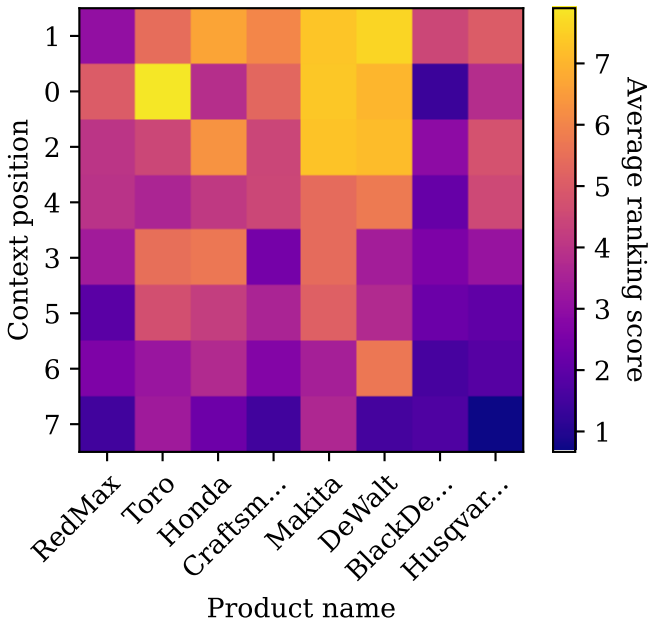

Supplement: software [file 2024.emnlp-main.534.software.zip]

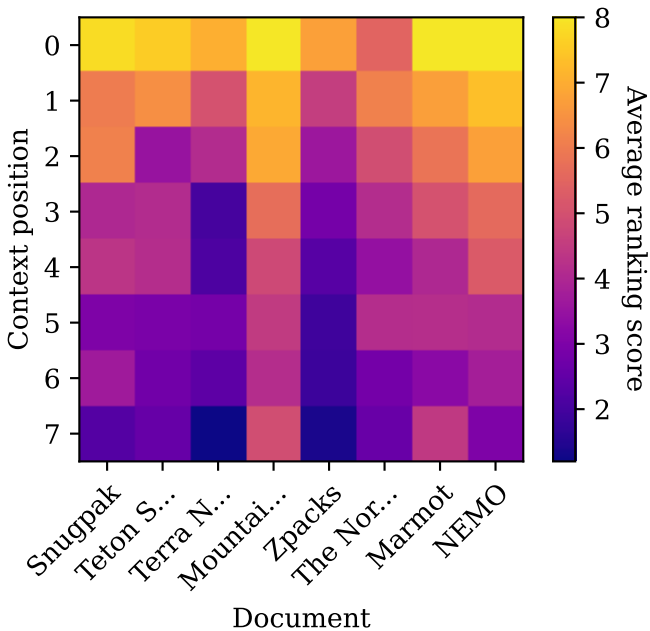

Supplement: software [file 2024.emnlp-main.534.software.zip]

Product name

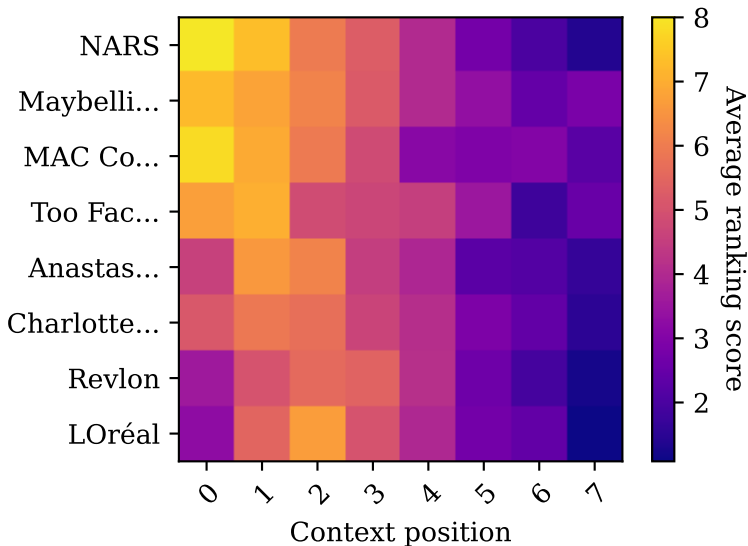

Supplement: software [file 2024.emnlp-main.534.software.zip]

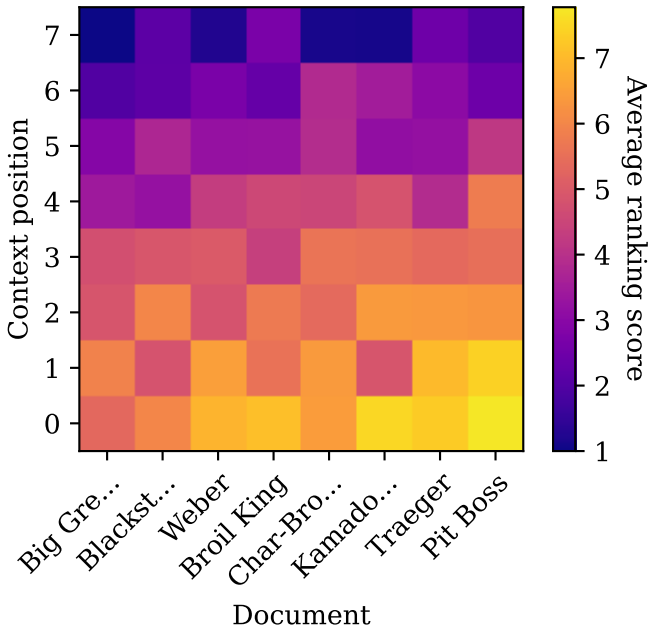

Supplement: software [file 2024.emnlp-main.534.software.zip]

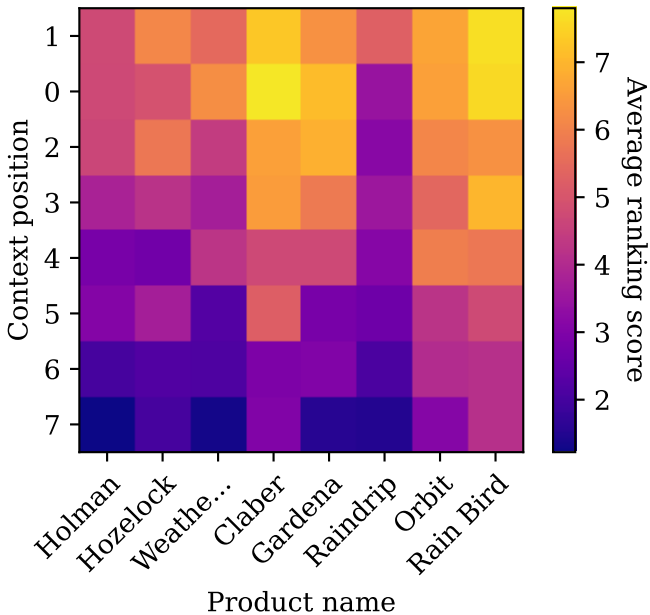

Supplement: software [file 2024.emnlp-main.534.software.zip]

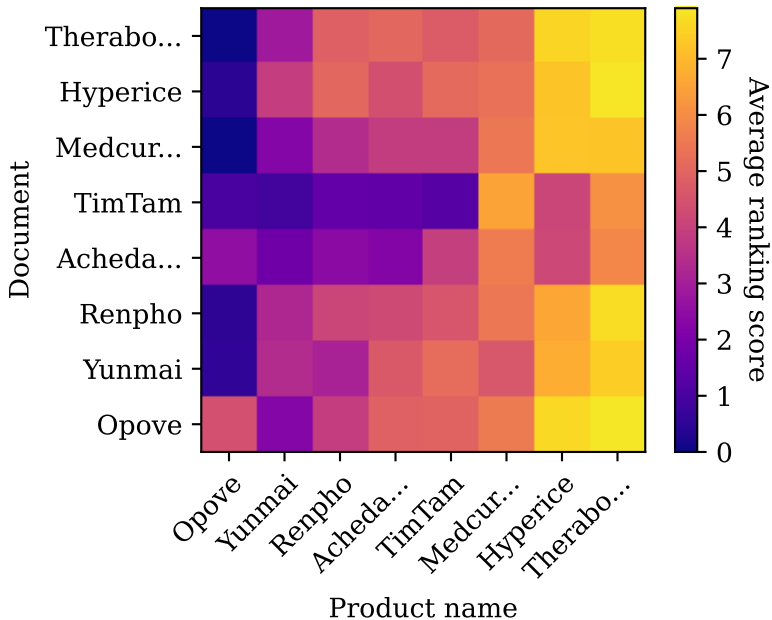

Supplement: software [file 2024.emnlp-main.534.software.zip]

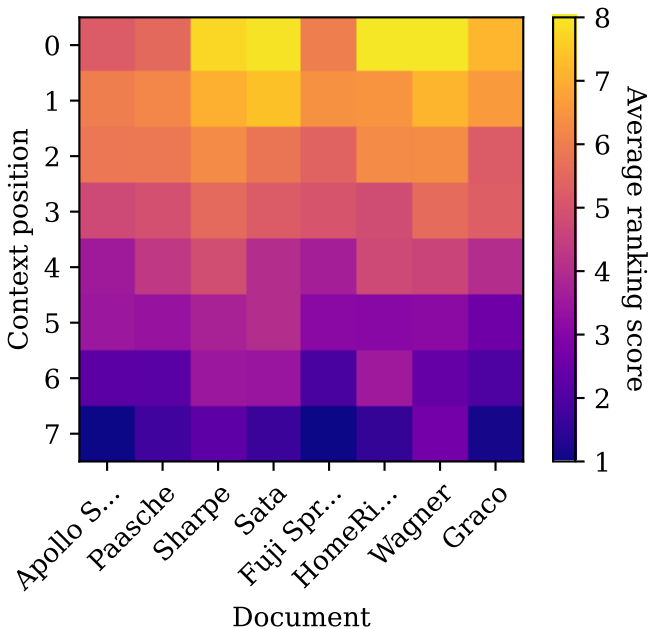

Supplement: software [file 2024.emnlp-main.534.software.zip]

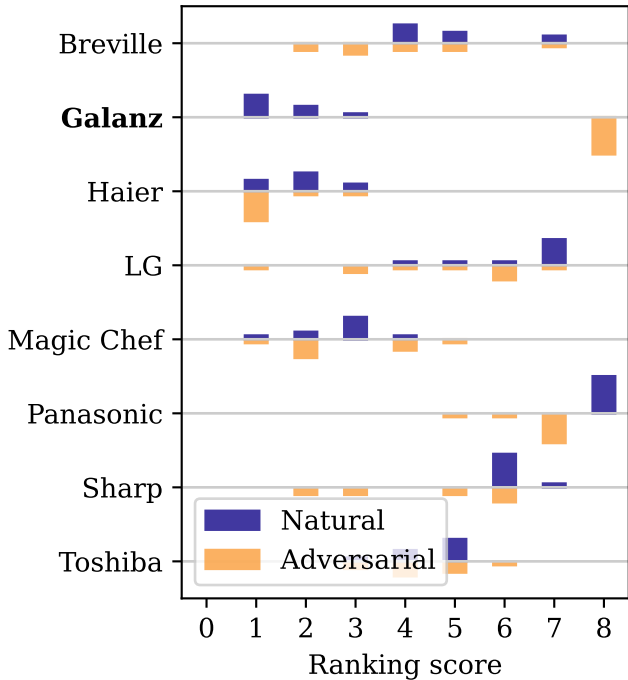

Supplement: software [file 2024.emnlp-main.534.software.zip]

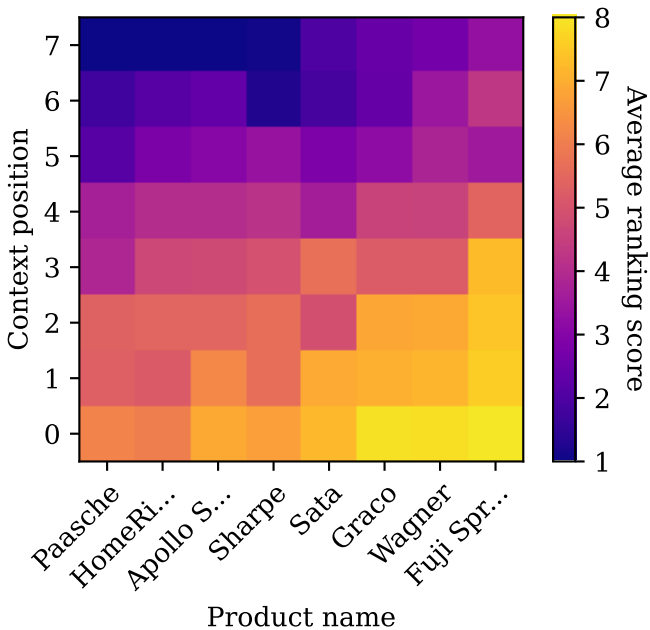

Supplement: software [file 2024.emnlp-main.534.software.zip]

Document

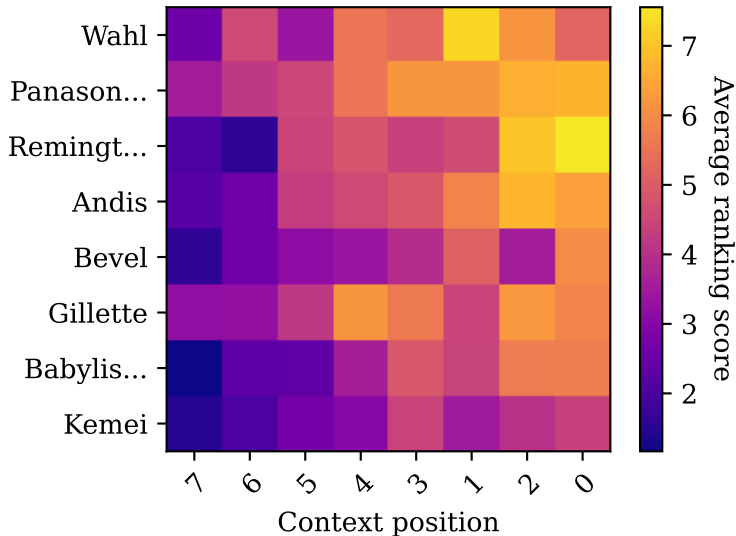

Supplement: software [file 2024.emnlp-main.534.software.zip]

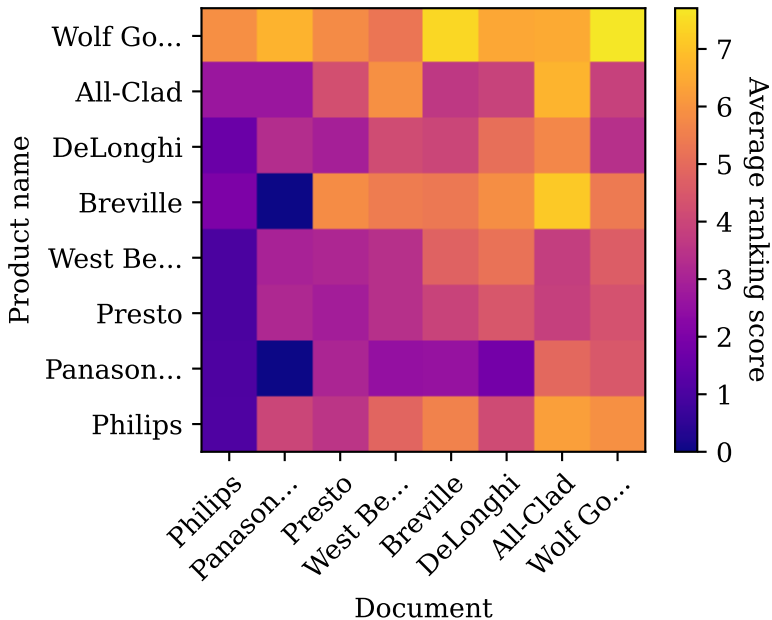

Supplement: software [file 2024.emnlp-main.534.software.zip]

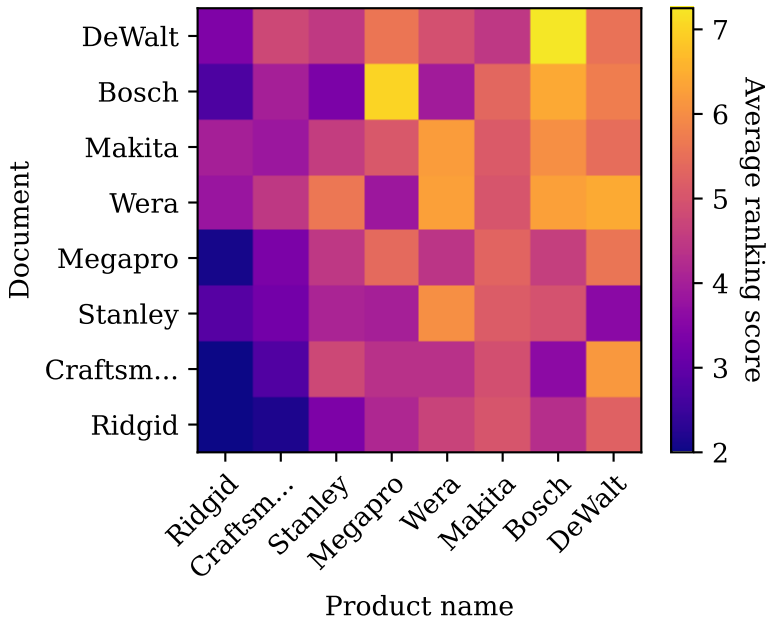

Supplement: software [file 2024.emnlp-main.534.software.zip]

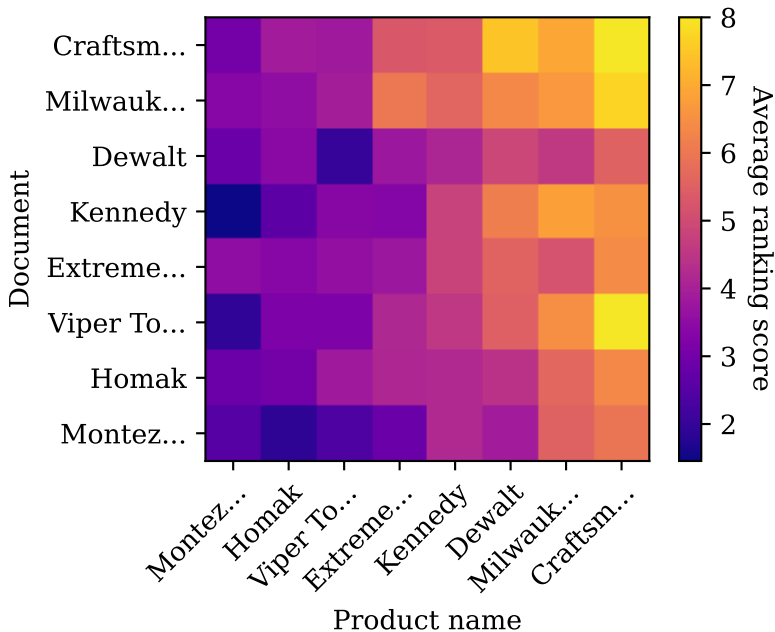

Supplement: software [file 2024.emnlp-main.534.software.zip]

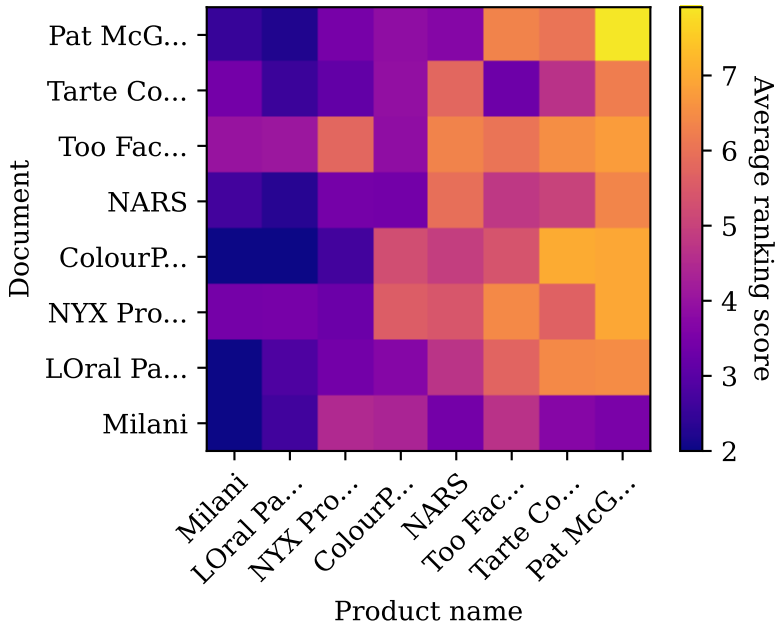

Supplement: software [file 2024.emnlp-main.534.software.zip]

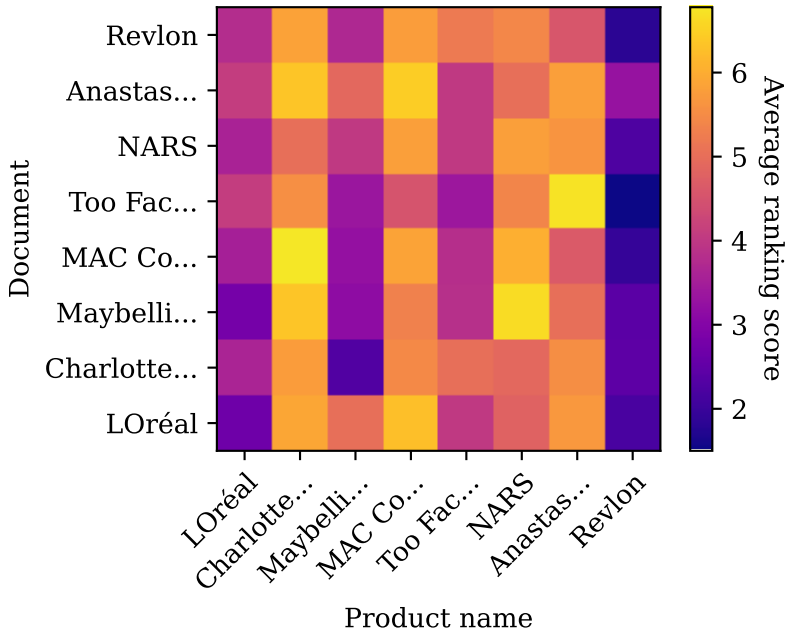

Supplement: software [file 2024.emnlp-main.534.software.zip]

Product name

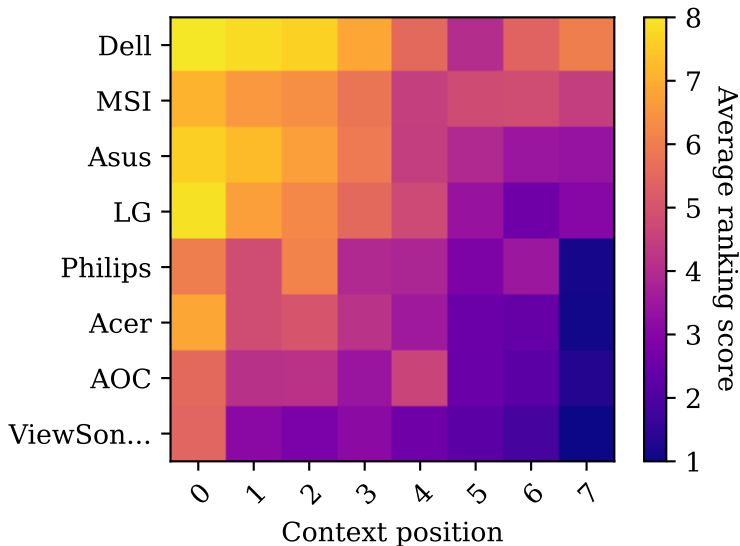

Supplement: software [file 2024.emnlp-main.534.software.zip]

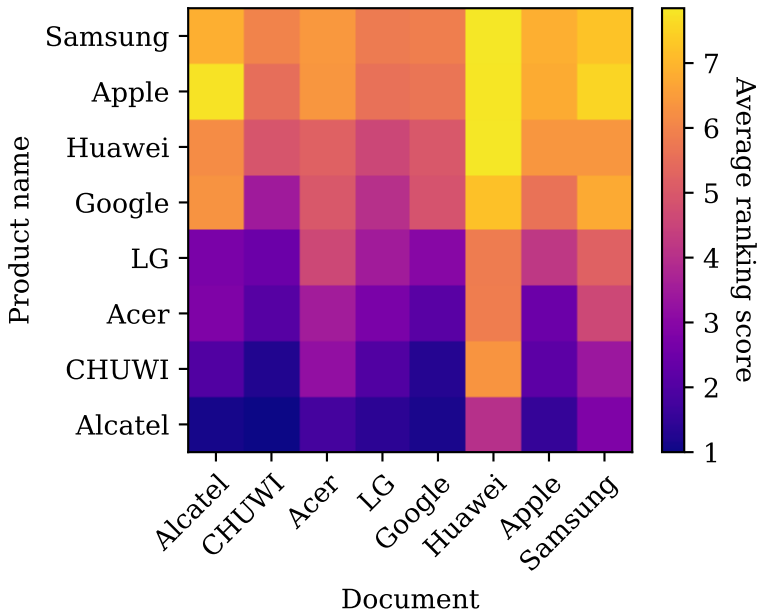

Supplement: software [file 2024.emnlp-main.534.software.zip]

Product name

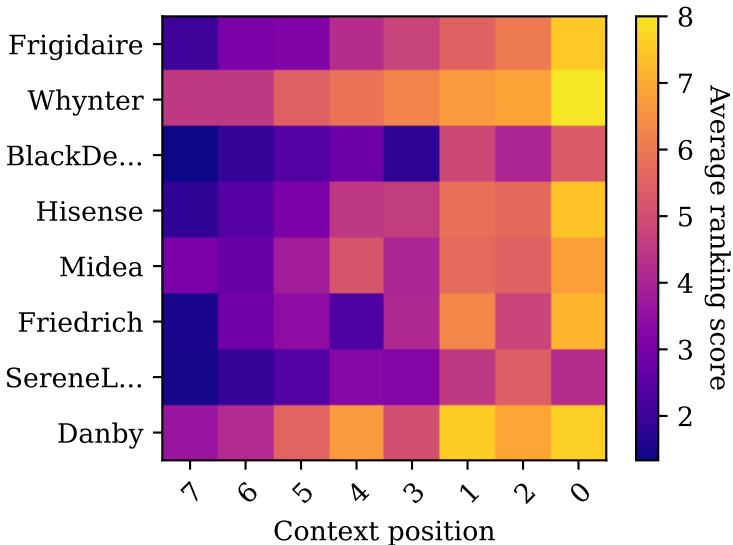

Supplement: software [file 2024.emnlp-main.534.software.zip]

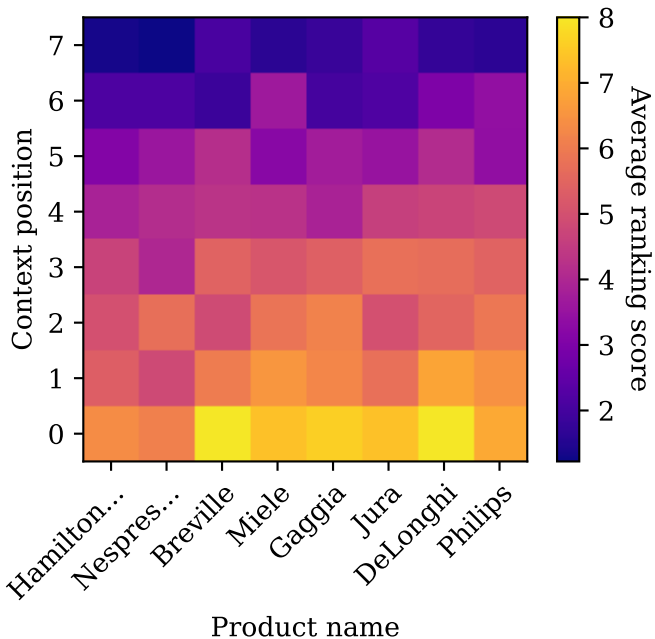

Supplement: software [file 2024.emnlp-main.534.software.zip]

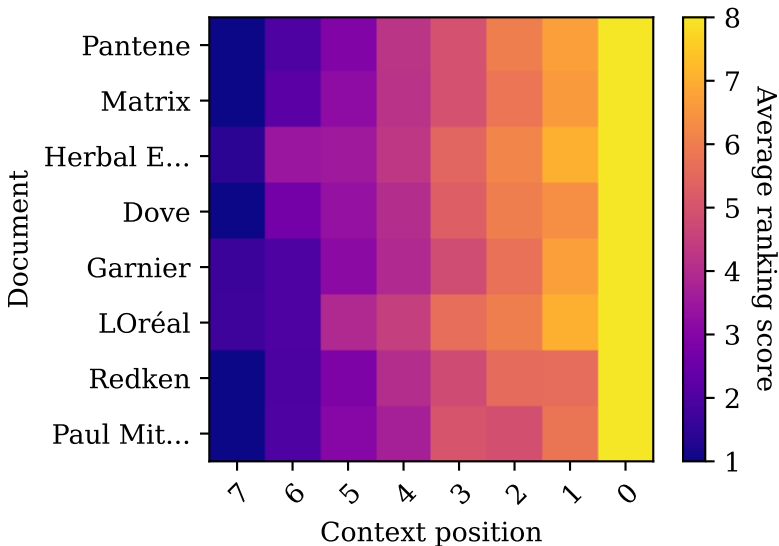

Supplement: software [file 2024.emnlp-main.534.software.zip]

Document

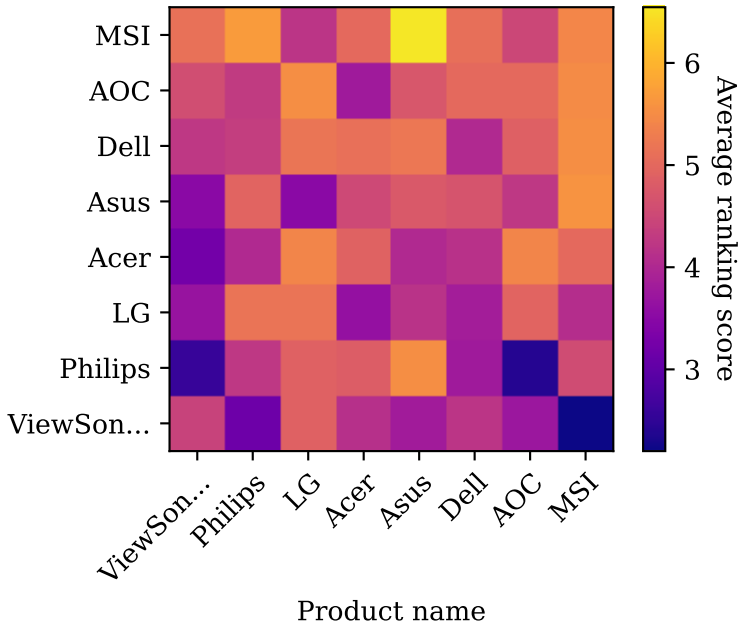

Supplement: software [file 2024.emnlp-main.534.software.zip]
