# Supplementary material (part 3 of 28)
Source: ML conference proceedings conference paper supplement (https://aclanthology.org/2024.emnlp-main.534)

Product name

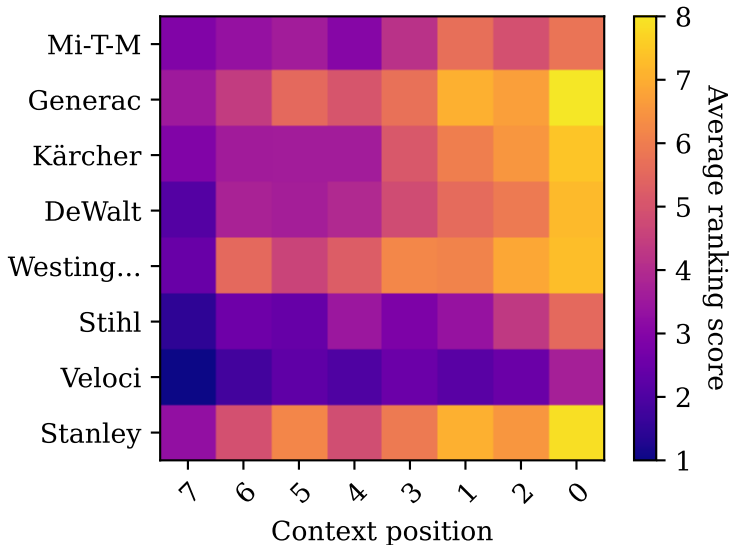

Supplement: software [file 2024.emnlp-main.534.software.zip]

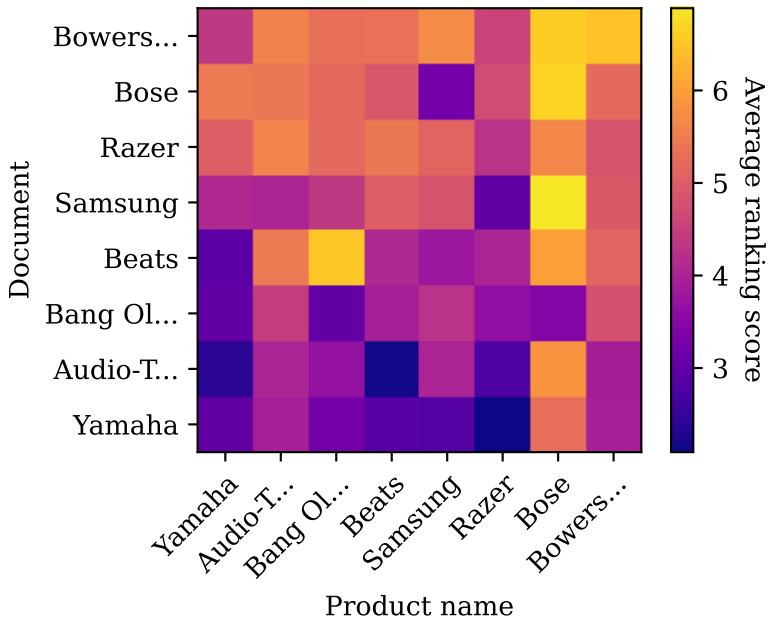

Supplement: software [file 2024.emnlp-main.534.software.zip]

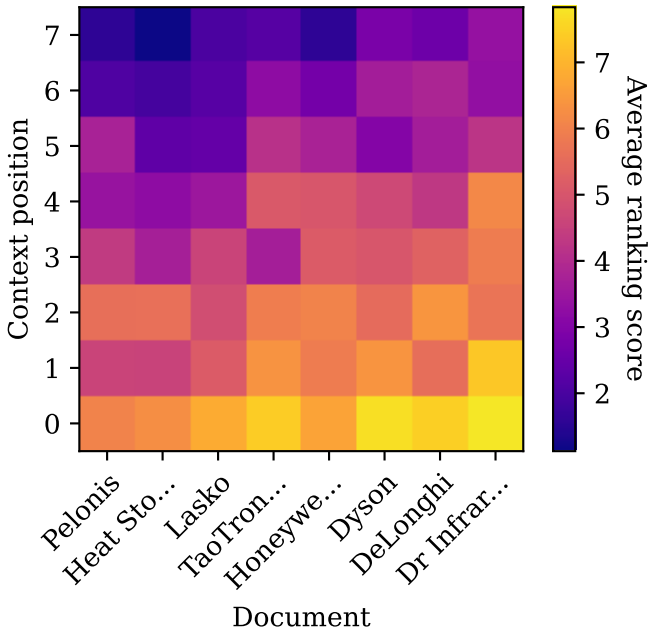

Supplement: software [file 2024.emnlp-main.534.software.zip]

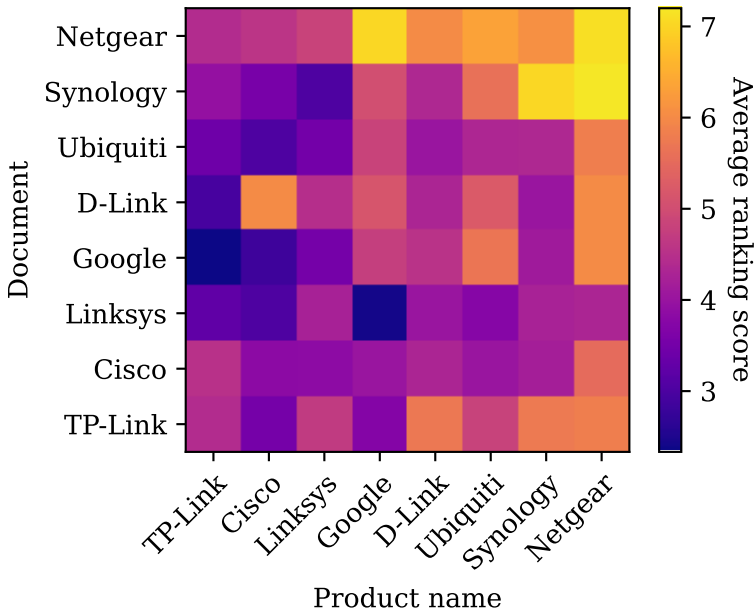

Supplement: software [file 2024.emnlp-main.534.software.zip]

Product name

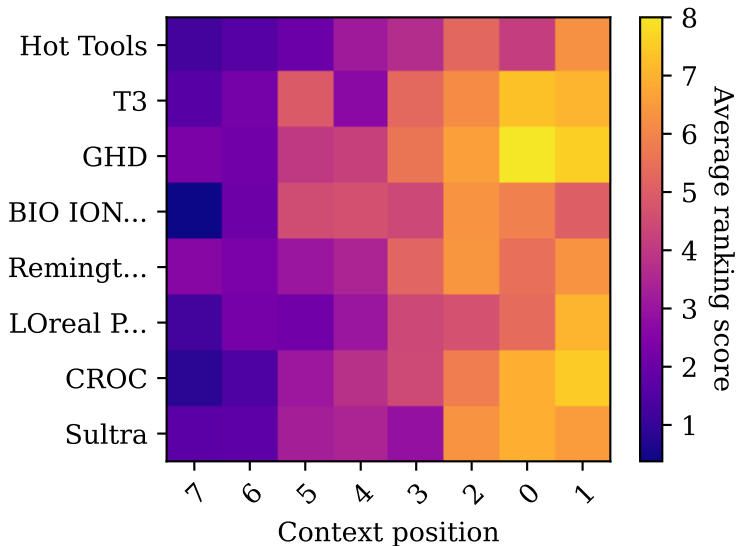

Supplement: software [file 2024.emnlp-main.534.software.zip]

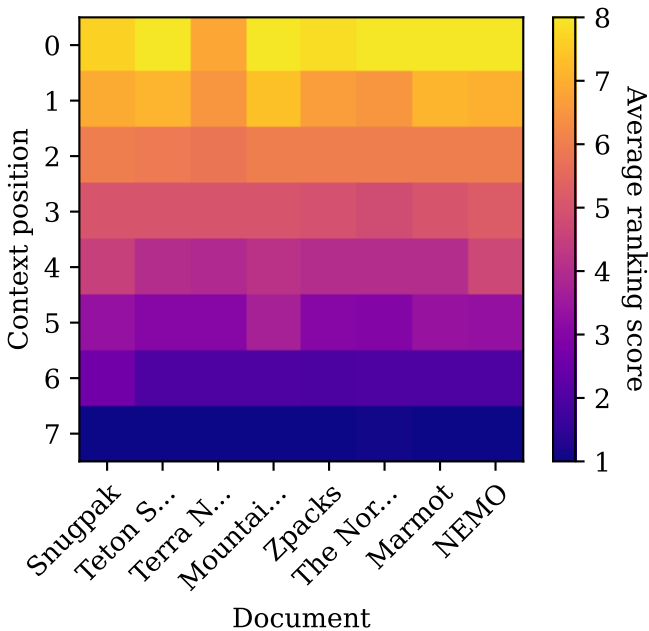

Supplement: software [file 2024.emnlp-main.534.software.zip]

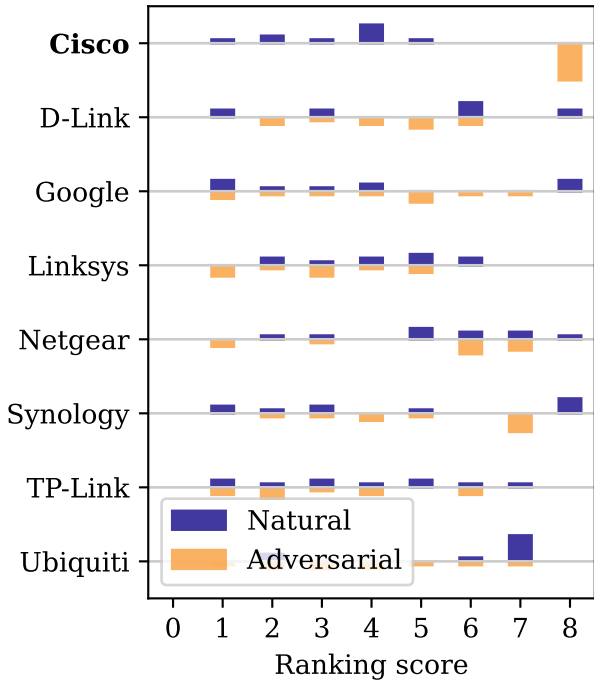

Supplement: software [file 2024.emnlp-main.534.software.zip]

Document

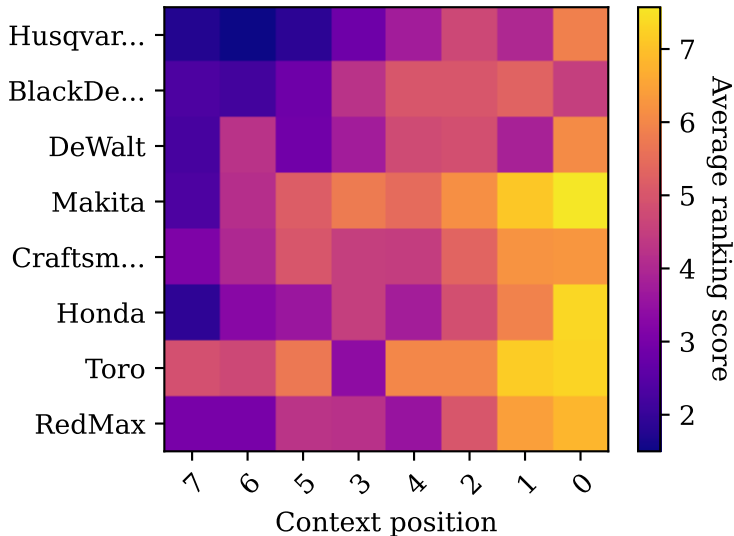

Supplement: software [file 2024.emnlp-main.534.software.zip]

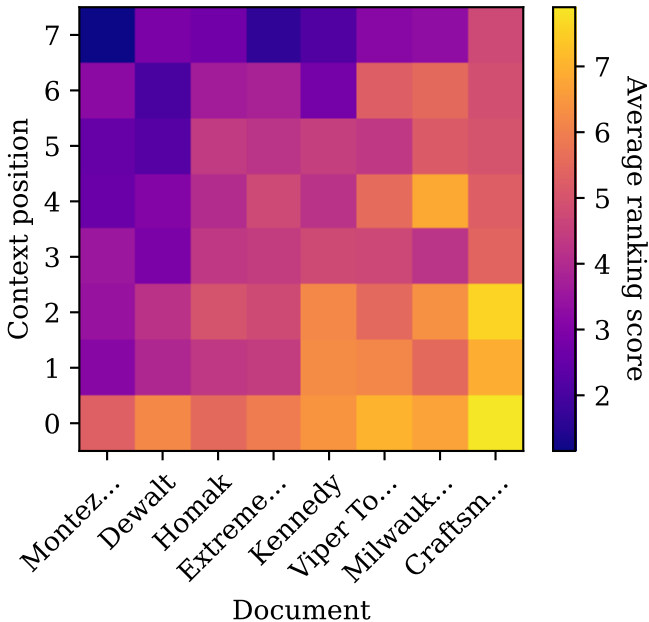

Supplement: software [file 2024.emnlp-main.534.software.zip]

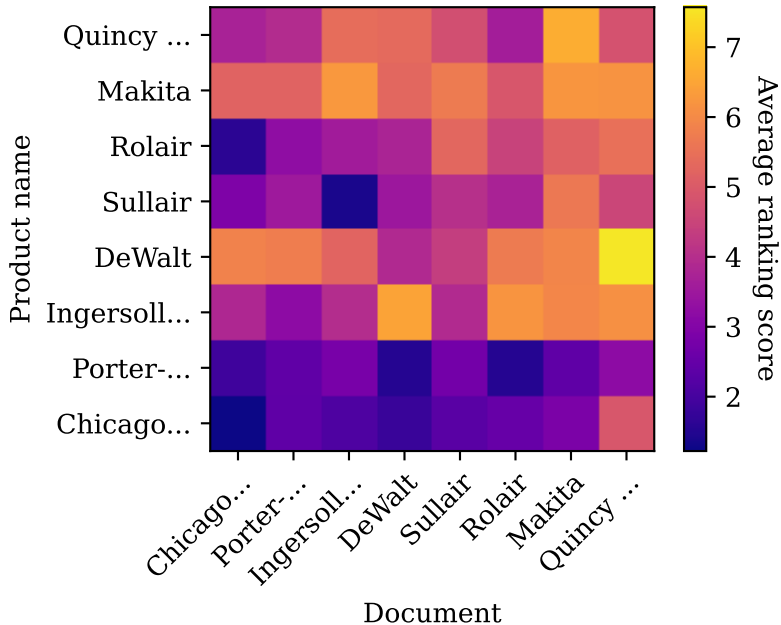

Supplement: software [file 2024.emnlp-main.534.software.zip]

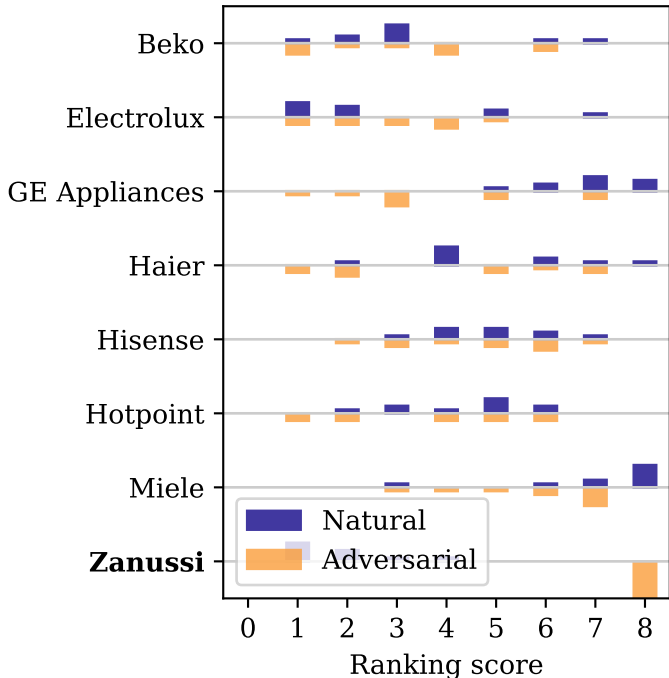

Supplement: software [file 2024.emnlp-main.534.software.zip]

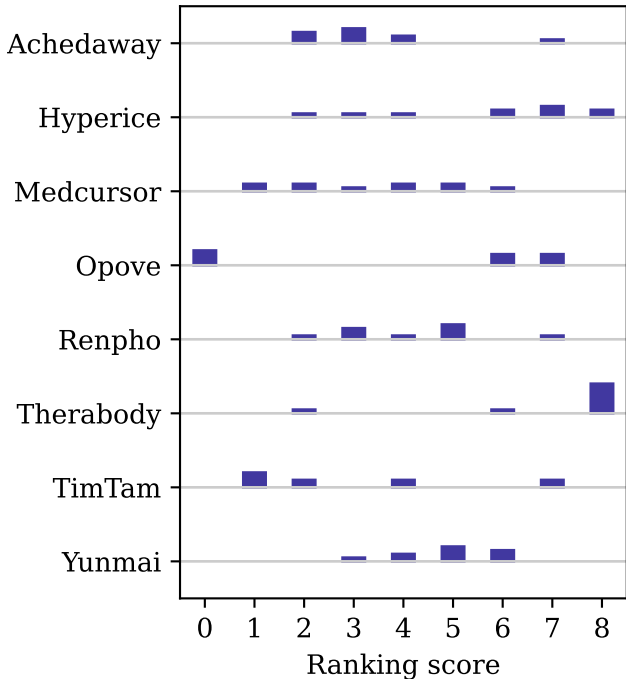

Supplement: software [file 2024.emnlp-main.534.software.zip]

Document

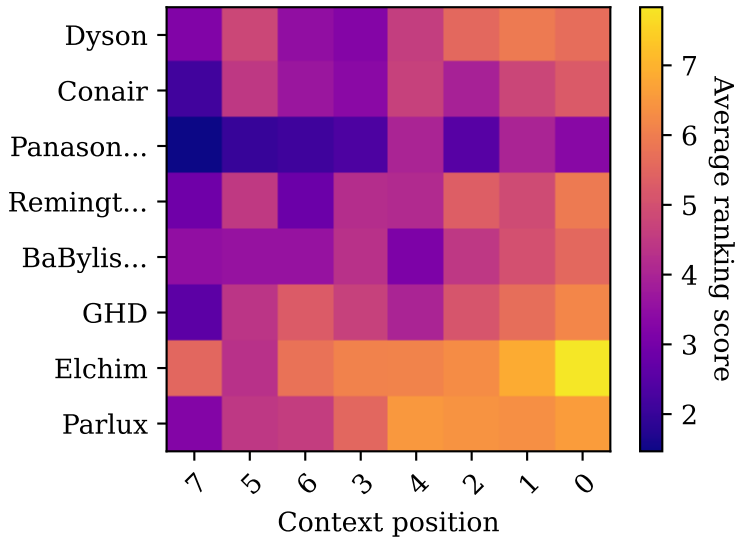

Supplement: software [file 2024.emnlp-main.534.software.zip]

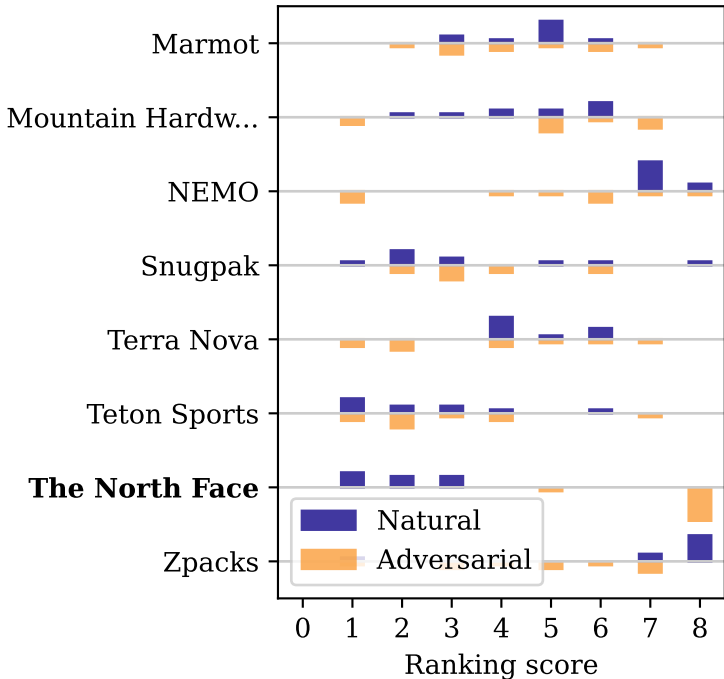

Supplement: software [file 2024.emnlp-main.534.software.zip]

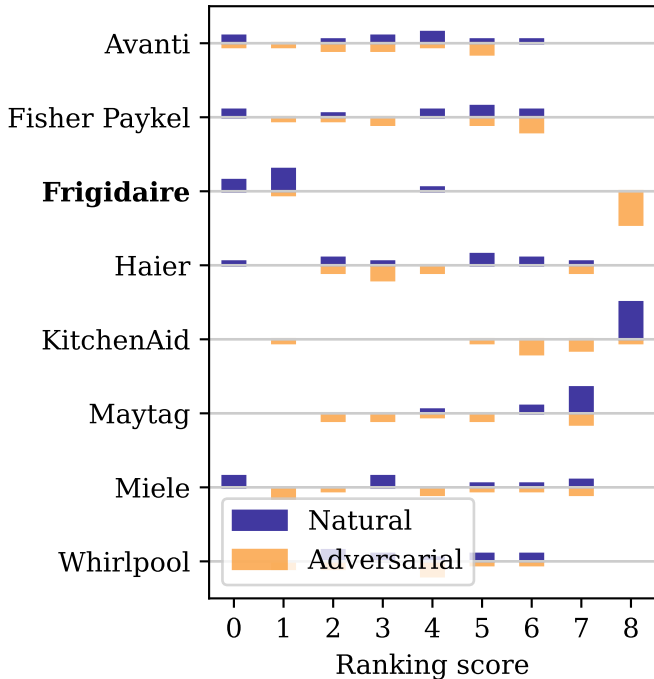

Supplement: software [file 2024.emnlp-main.534.software.zip]

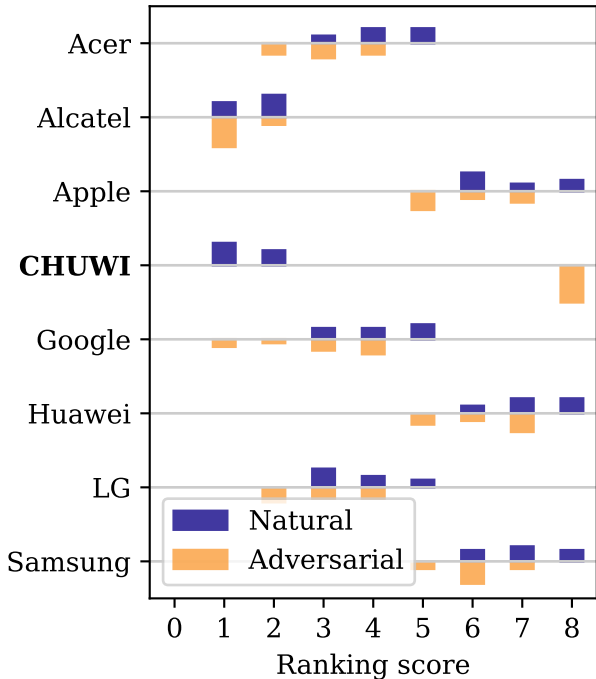

Supplement: software [file 2024.emnlp-main.534.software.zip]

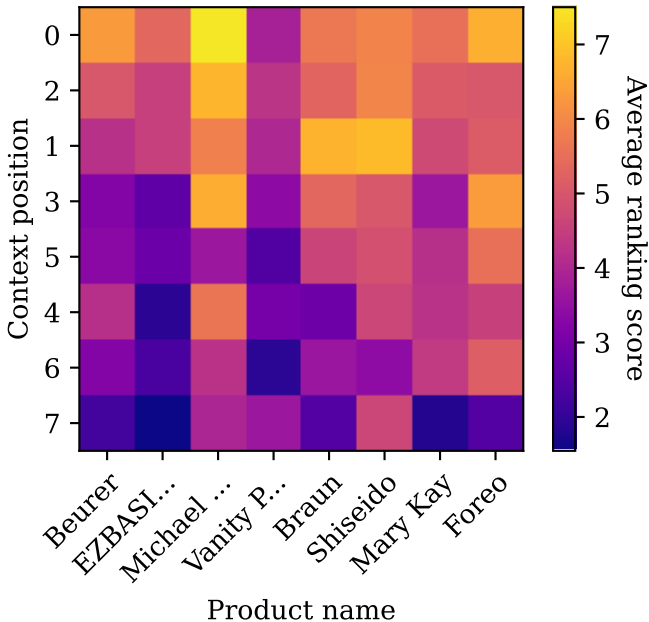

Supplement: software [file 2024.emnlp-main.534.software.zip]

Document

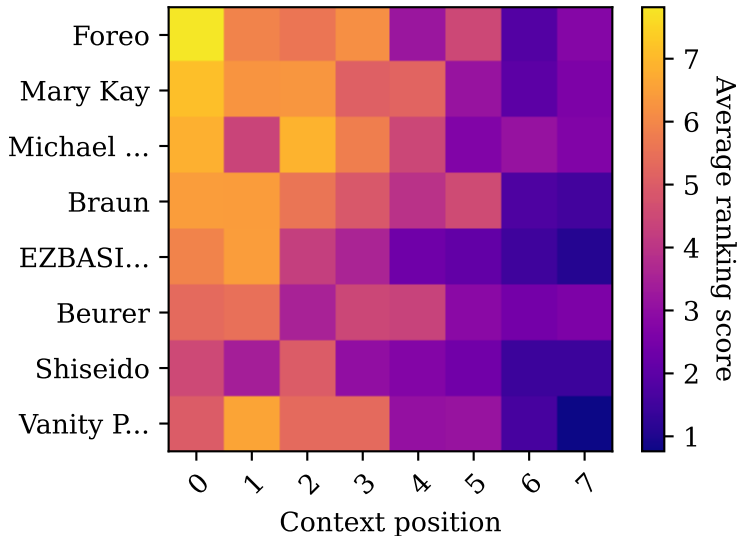

Supplement: software [file 2024.emnlp-main.534.software.zip]

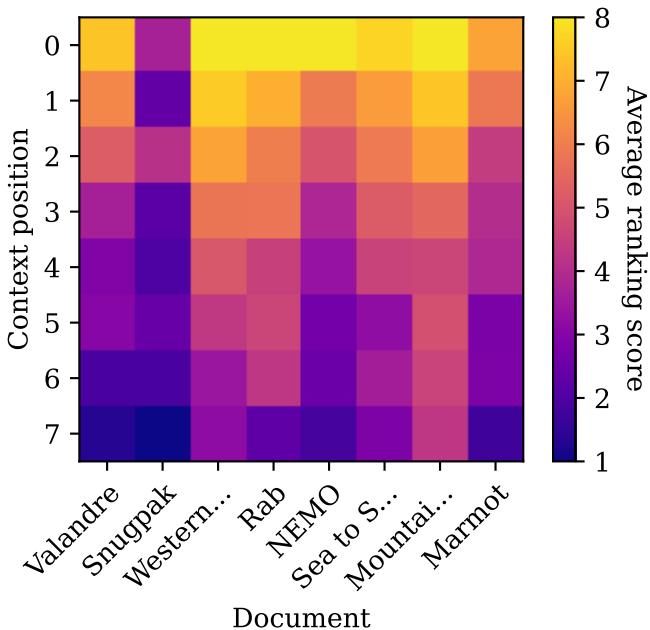

Supplement: software [file 2024.emnlp-main.534.software.zip]

Document

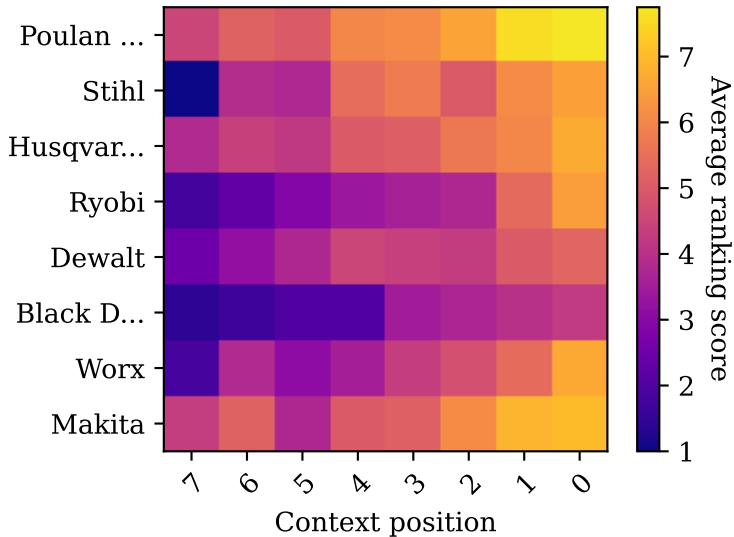

Supplement: software [file 2024.emnlp-main.534.software.zip]

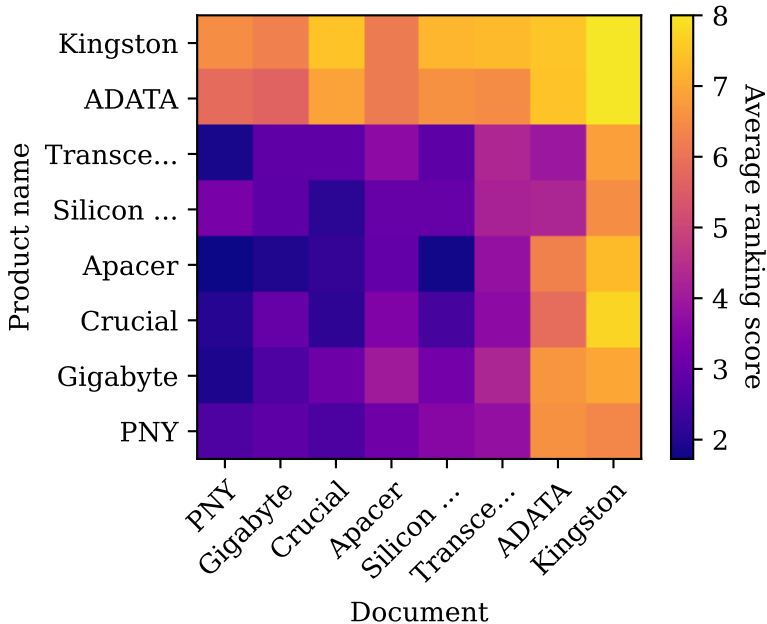

Supplement: software [file 2024.emnlp-main.534.software.zip]

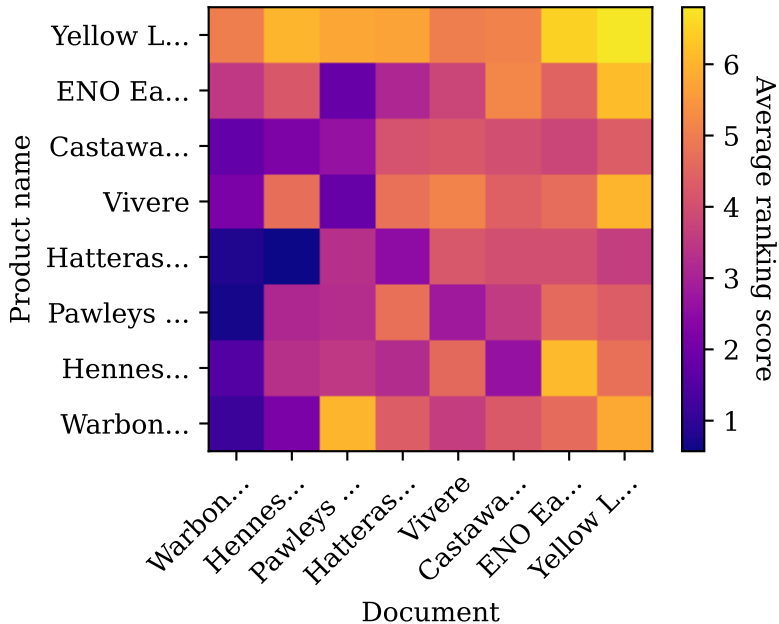

Supplement: software [file 2024.emnlp-main.534.software.zip]

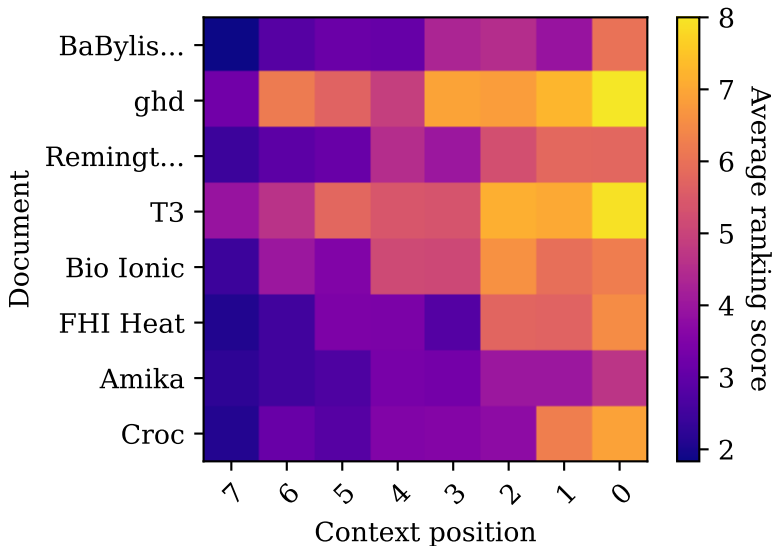

Supplement: software [file 2024.emnlp-main.534.software.zip]

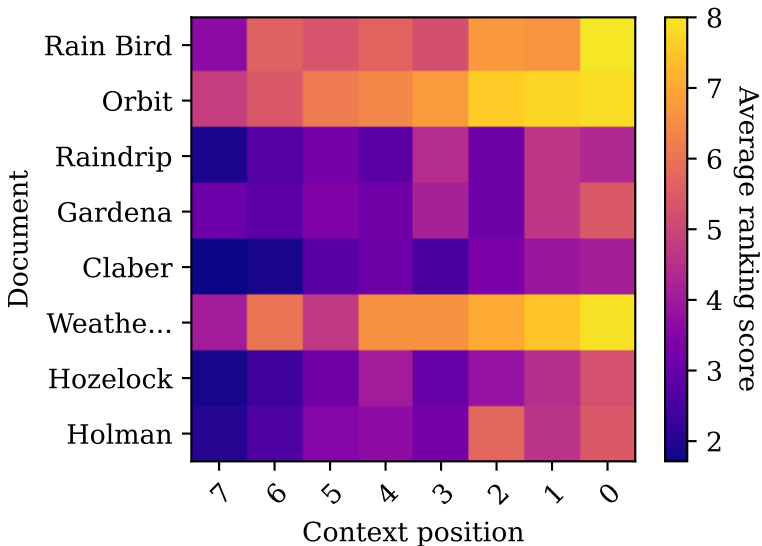

Supplement: software [file 2024.emnlp-main.534.software.zip]

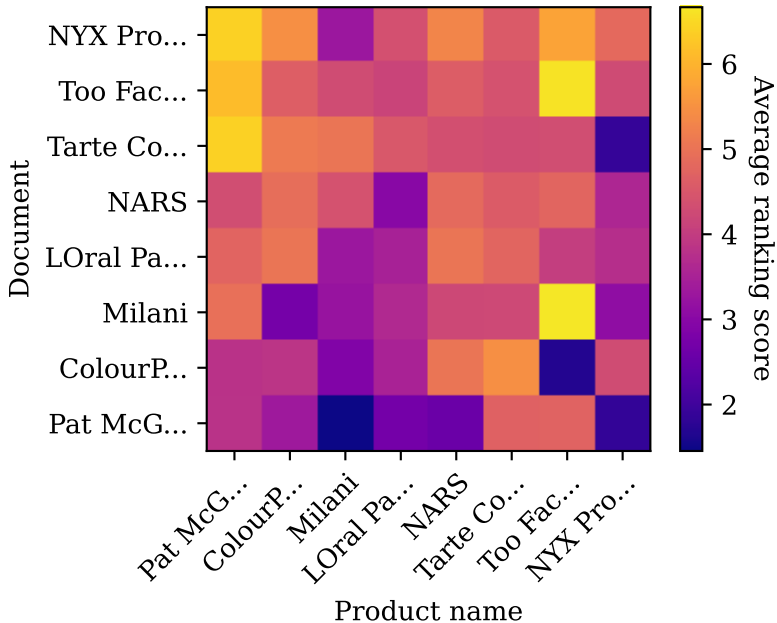

Supplement: software [file 2024.emnlp-main.534.software.zip]

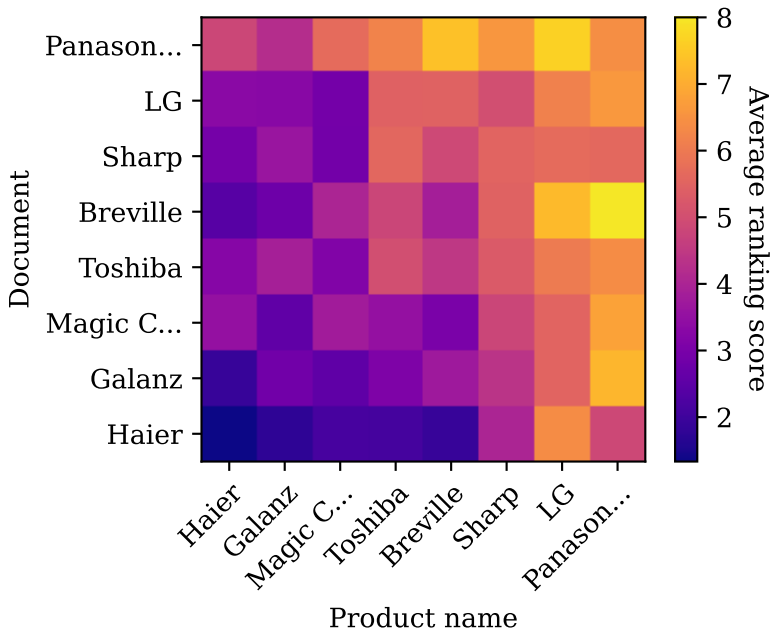

Supplement: software [file 2024.emnlp-main.534.software.zip]

Product name

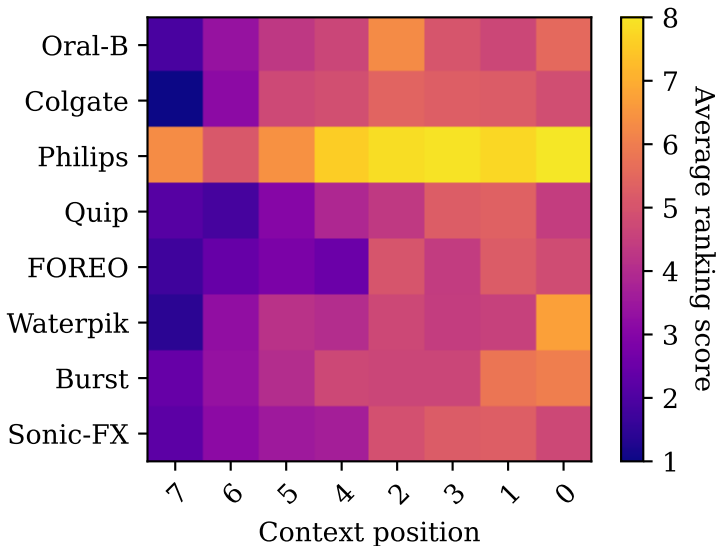

Supplement: software [file 2024.emnlp-main.534.software.zip]

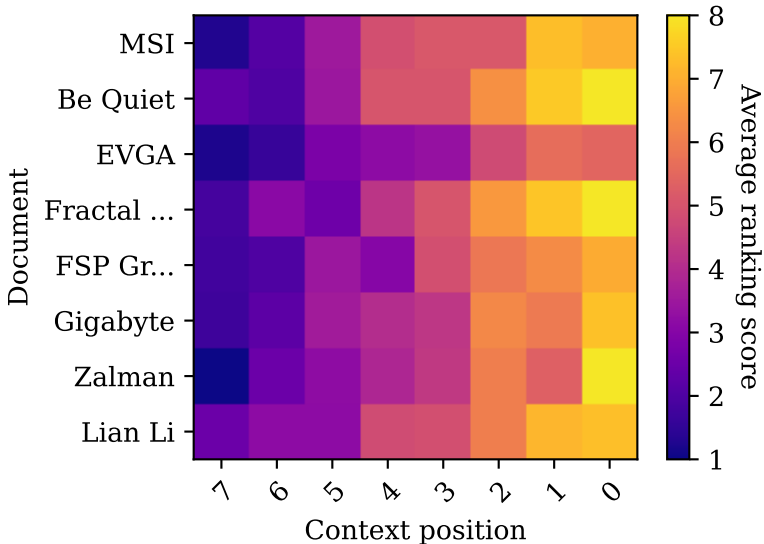

Supplement: software [file 2024.emnlp-main.534.software.zip]

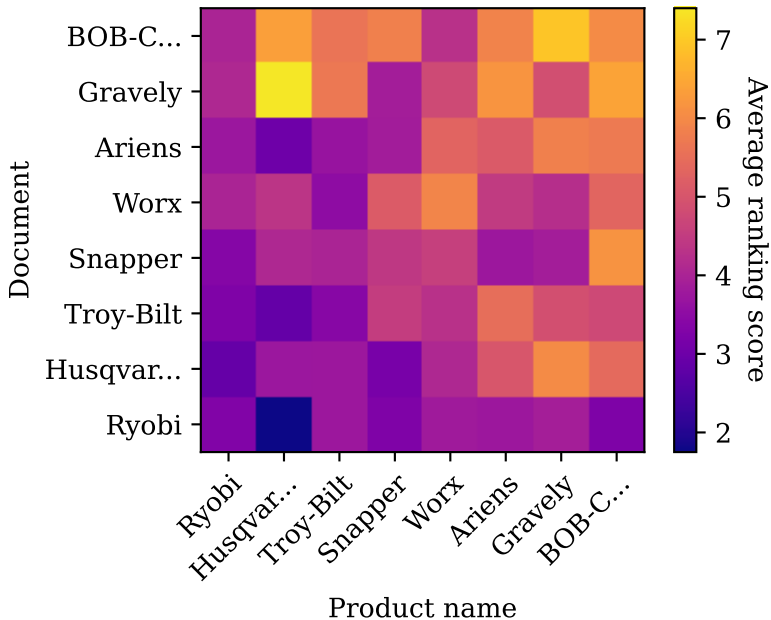

Supplement: software [file 2024.emnlp-main.534.software.zip]

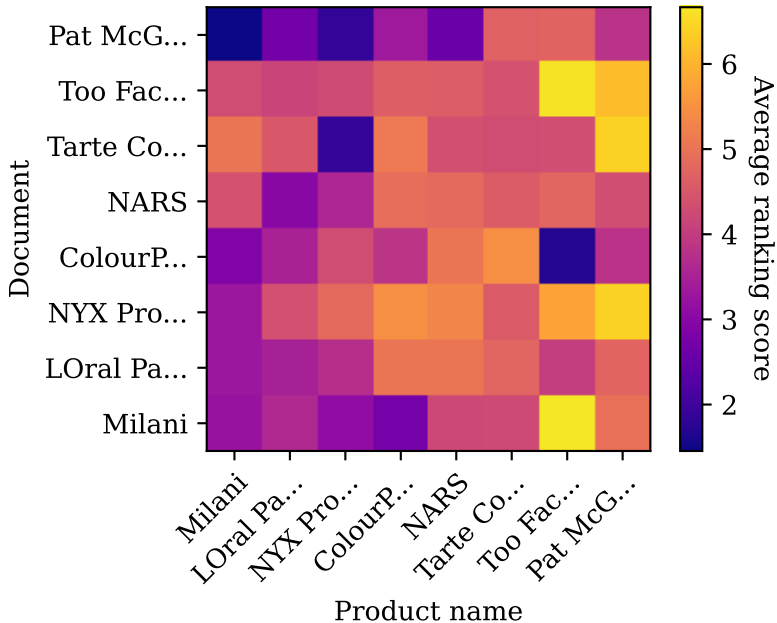

Supplement: software [file 2024.emnlp-main.534.software.zip]

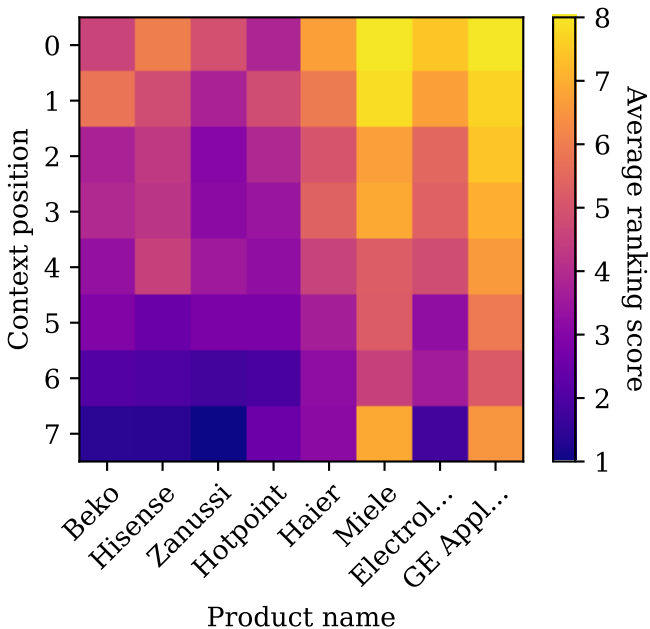

Supplement: software [file 2024.emnlp-main.534.software.zip]

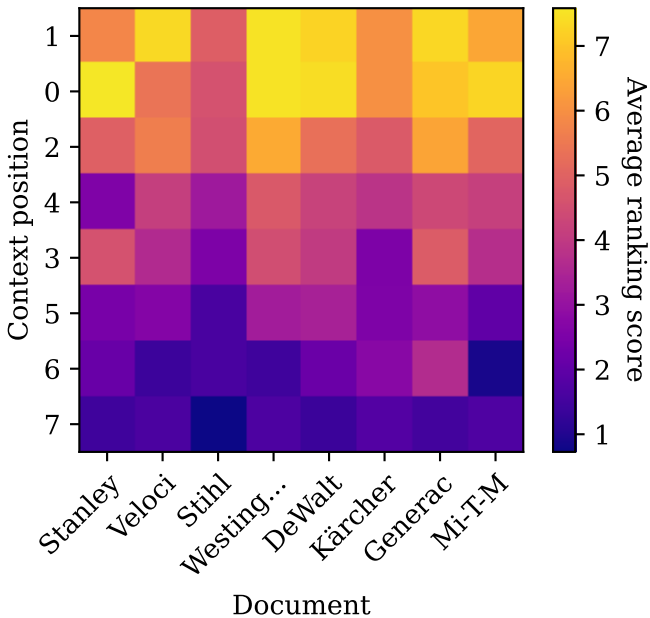

Supplement: software [file 2024.emnlp-main.534.software.zip]

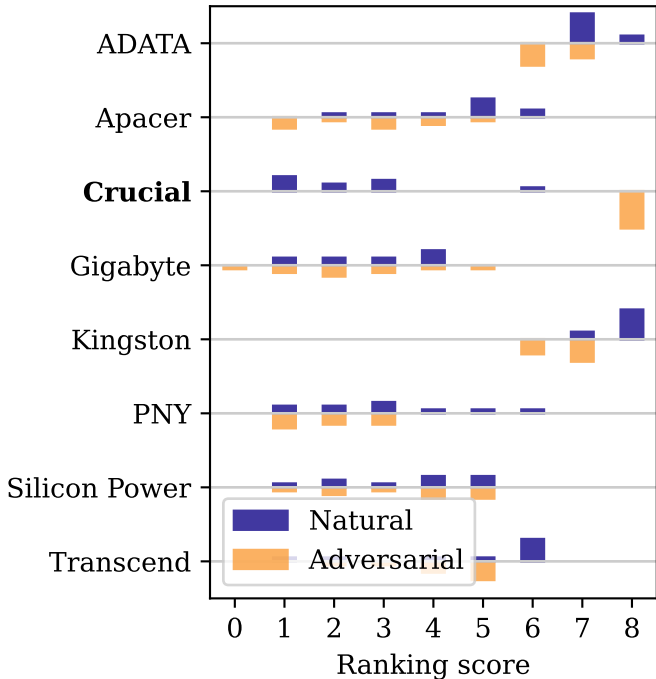

Supplement: software [file 2024.emnlp-main.534.software.zip]

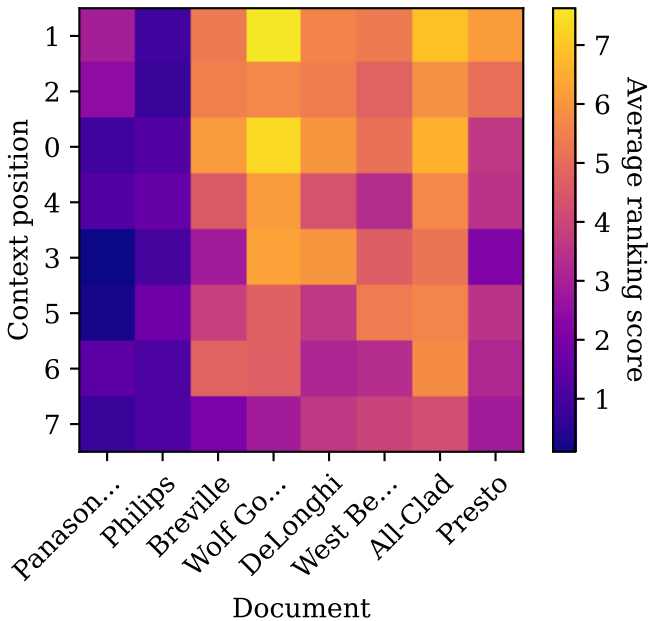

Supplement: software [file 2024.emnlp-main.534.software.zip]

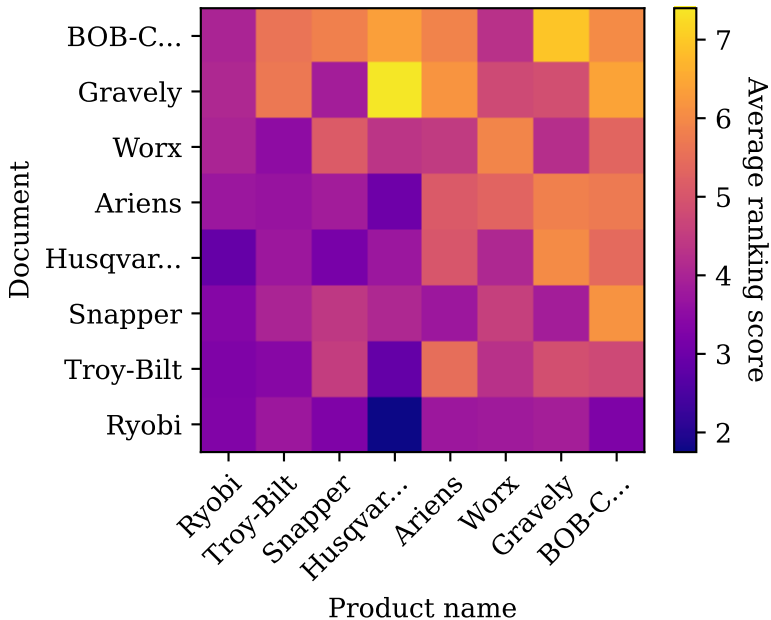

Supplement: software [file 2024.emnlp-main.534.software.zip]

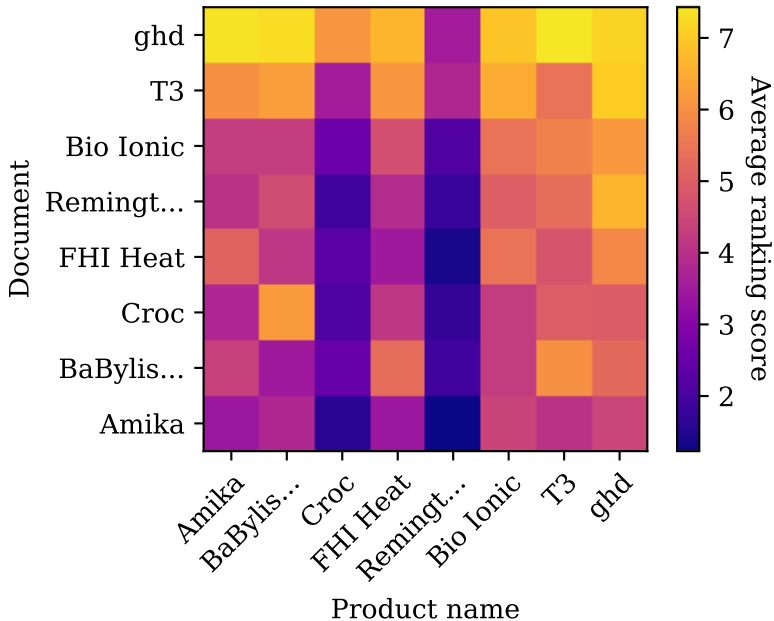

Supplement: software [file 2024.emnlp-main.534.software.zip]

## Hamilton Beach

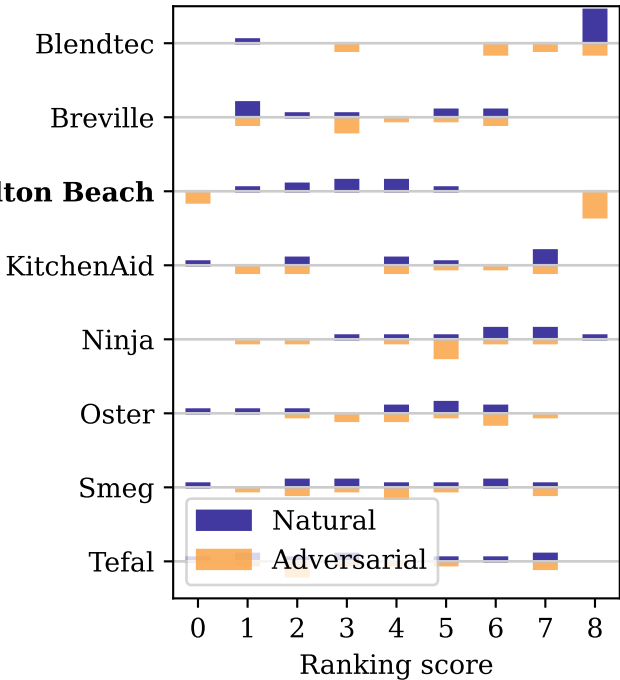

Supplement: software [file 2024.emnlp-main.534.software.zip]

Product name

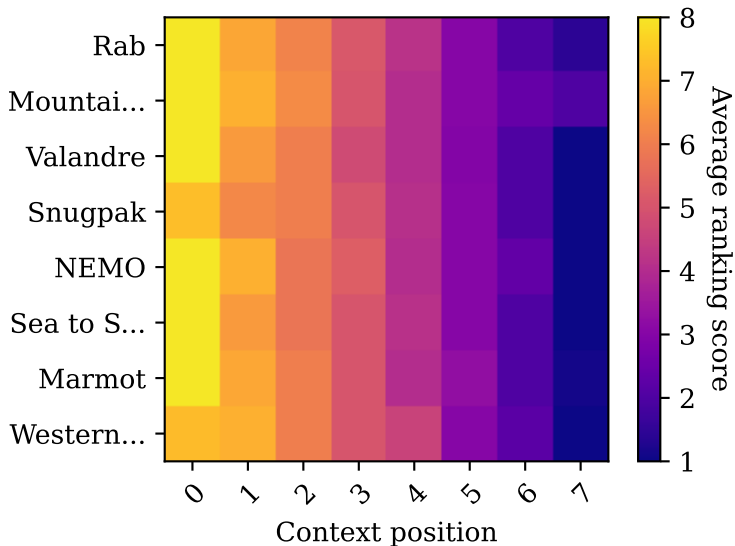

Supplement: software [file 2024.emnlp-main.534.software.zip]

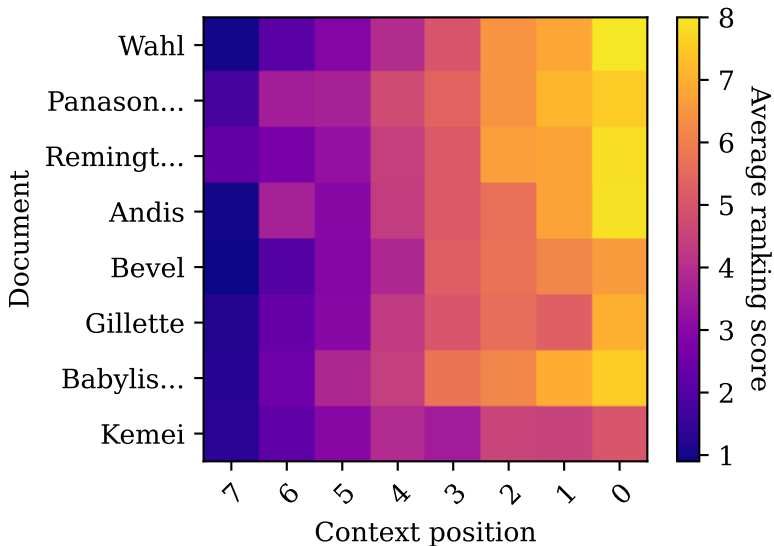

Supplement: software [file 2024.emnlp-main.534.software.zip]

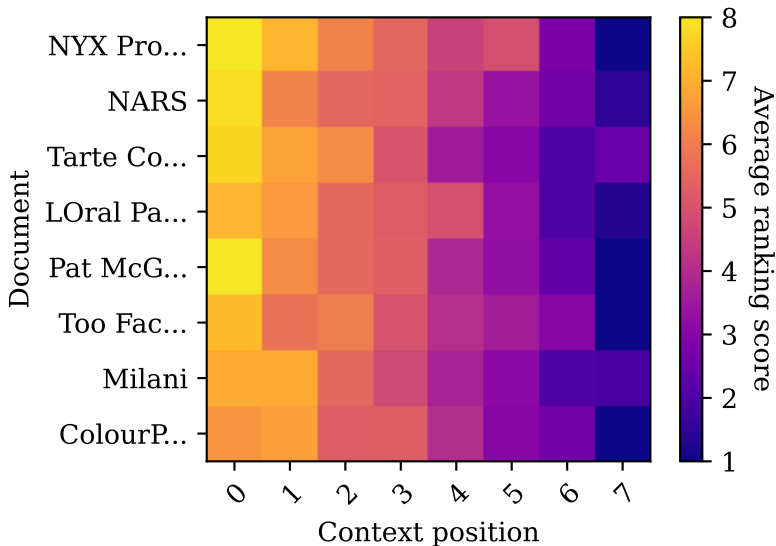

Supplement: software [file 2024.emnlp-main.534.software.zip]

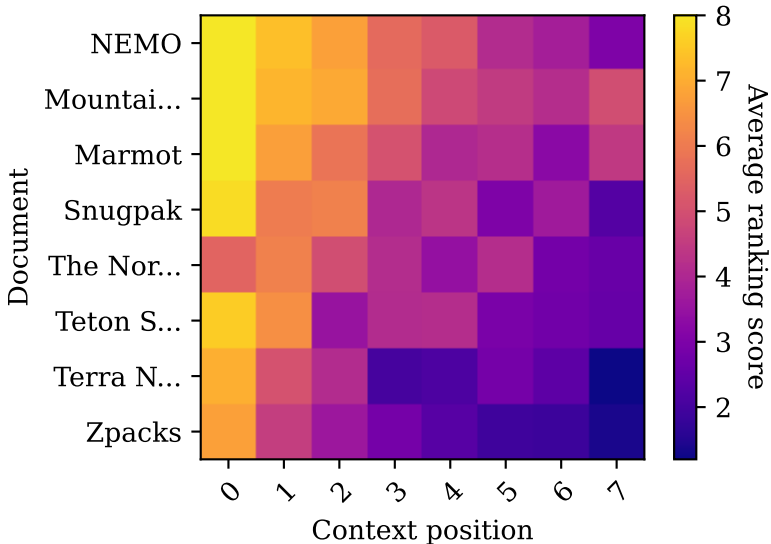

Supplement: software [file 2024.emnlp-main.534.software.zip]

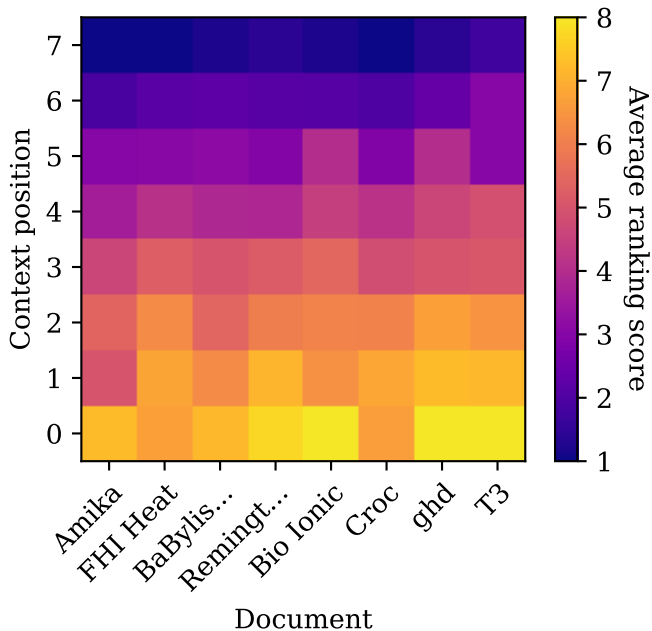

Supplement: software [file 2024.emnlp-main.534.software.zip]

Document

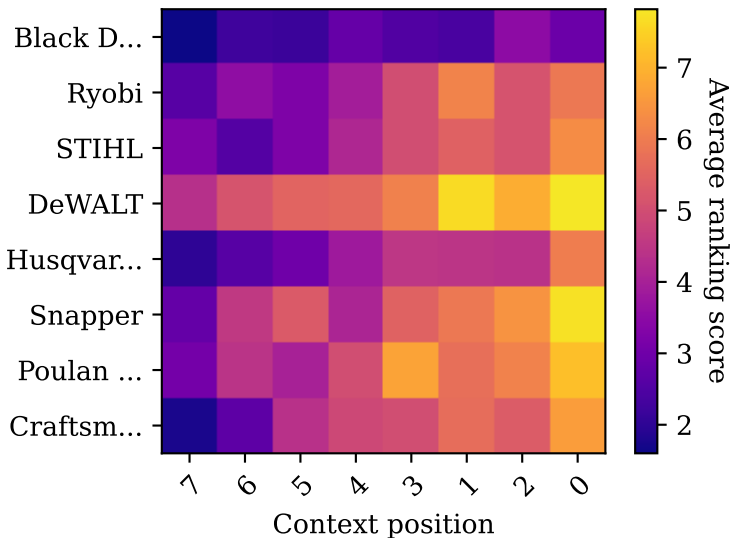

Supplement: software [file 2024.emnlp-main.534.software.zip]

Product name

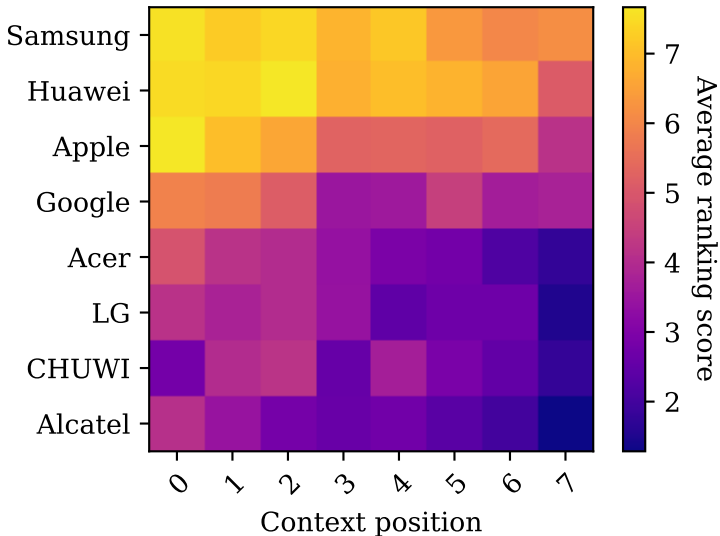

Supplement: software [file 2024.emnlp-main.534.software.zip]

Context position

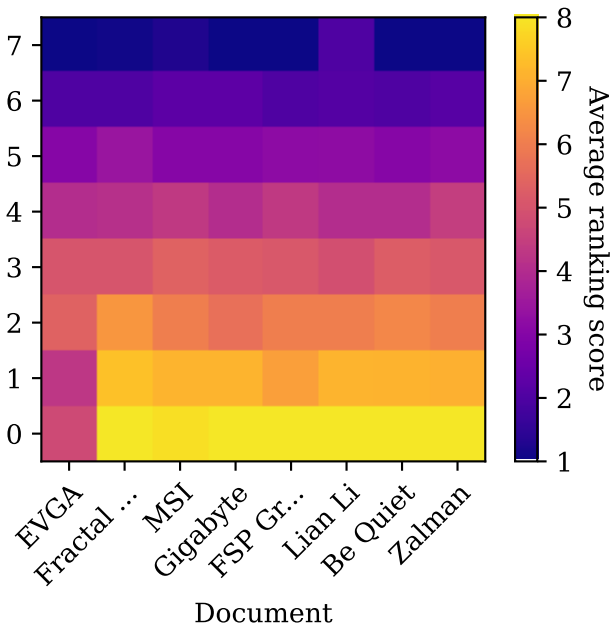

Supplement: software [file 2024.emnlp-main.534.software.zip]

Product name

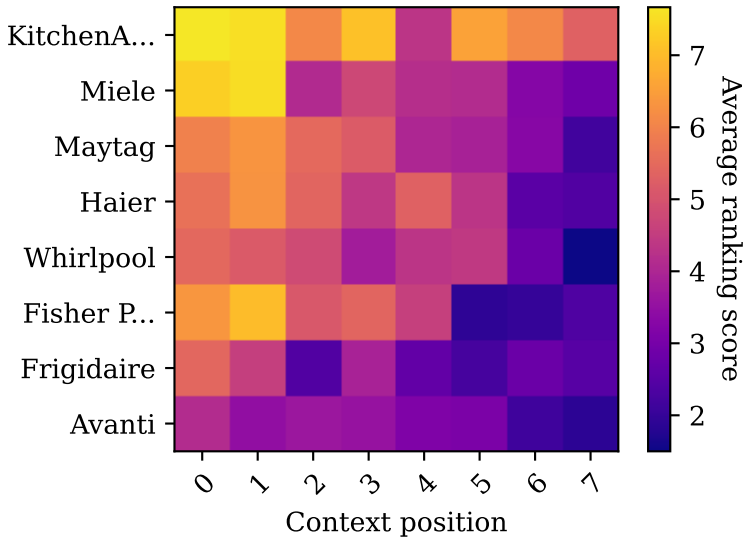

Supplement: software [file 2024.emnlp-main.534.software.zip]

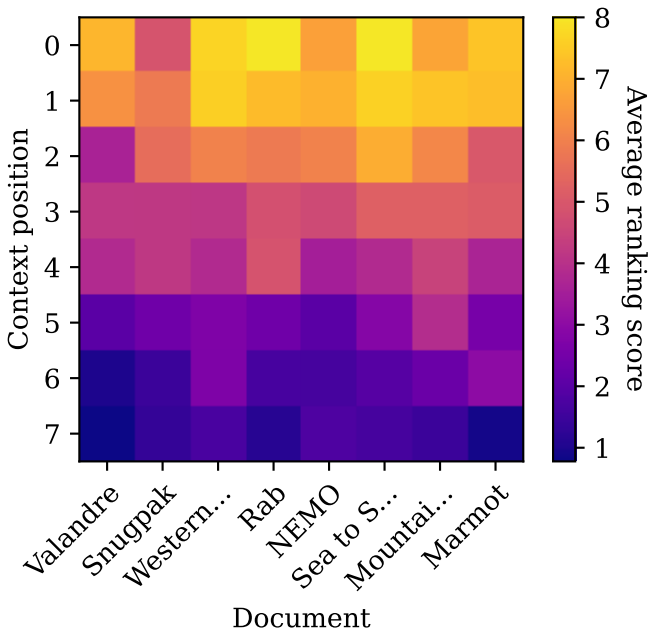

Supplement: software [file 2024.emnlp-main.534.software.zip]

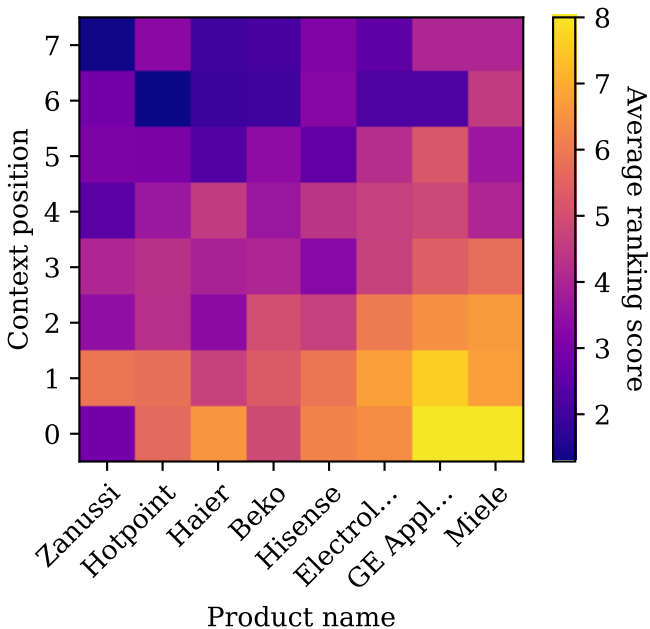

Supplement: software [file 2024.emnlp-main.534.software.zip]

Product name

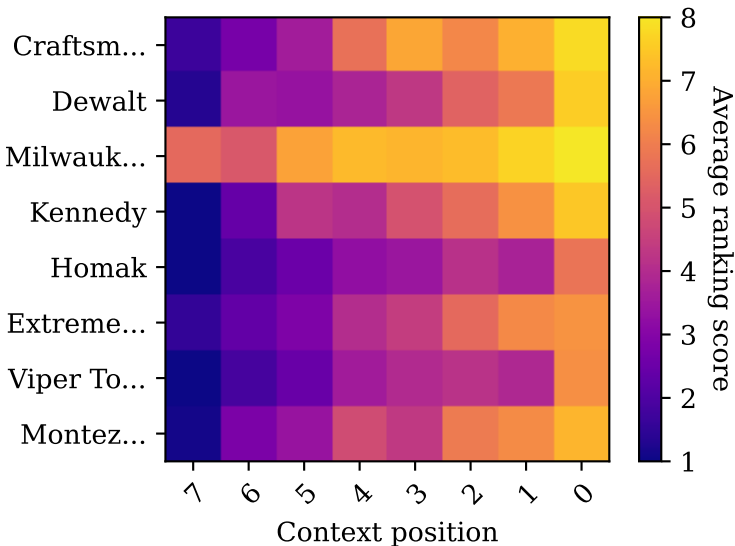

Supplement: software [file 2024.emnlp-main.534.software.zip]

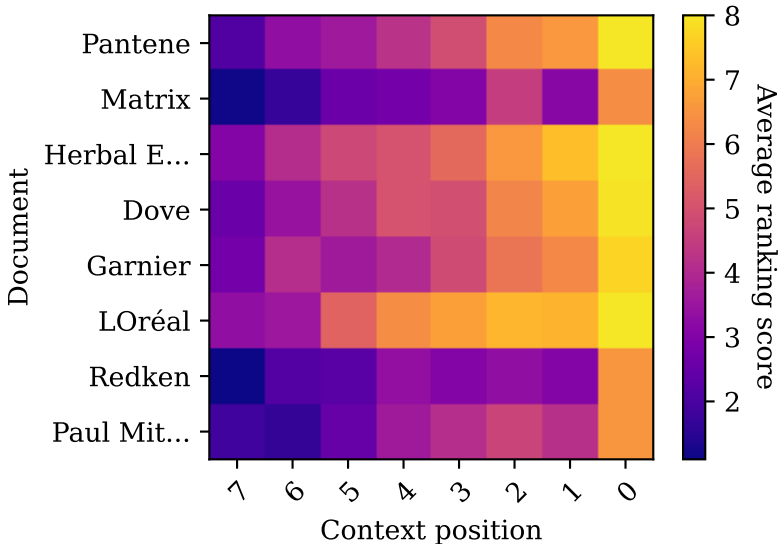

Supplement: software [file 2024.emnlp-main.534.software.zip]

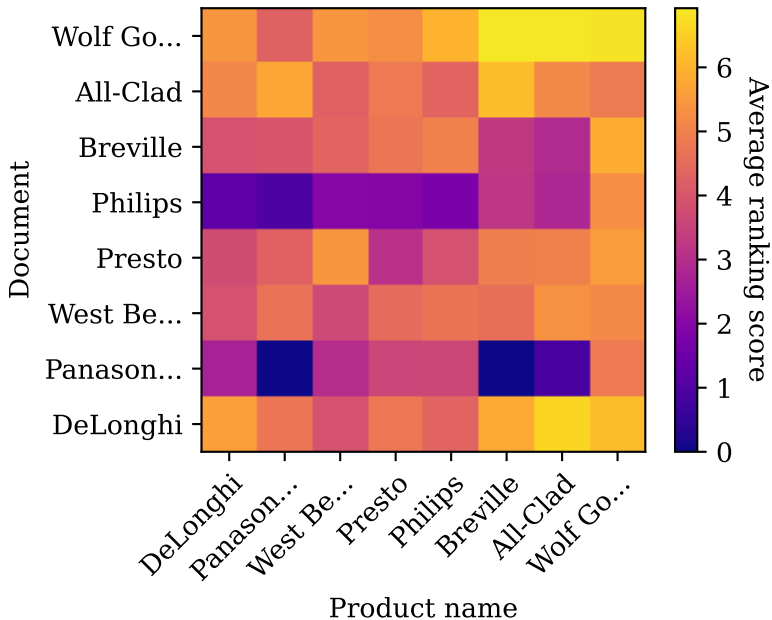

Supplement: software [file 2024.emnlp-main.534.software.zip]

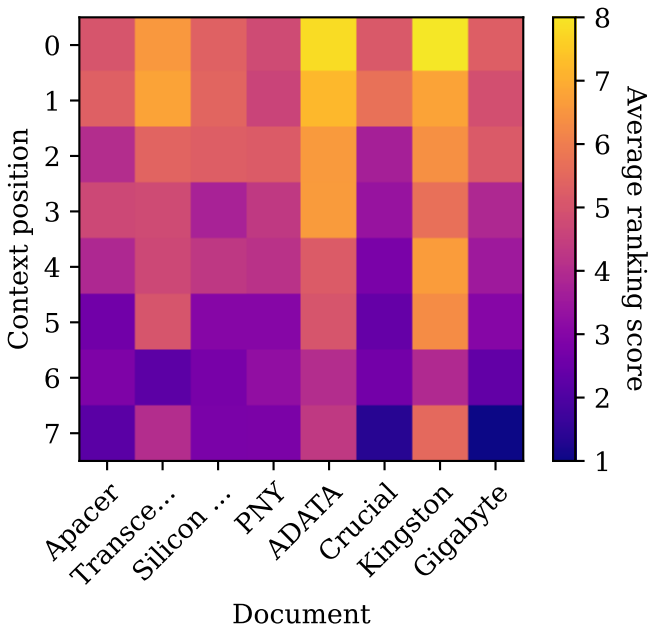

Supplement: software [file 2024.emnlp-main.534.software.zip]

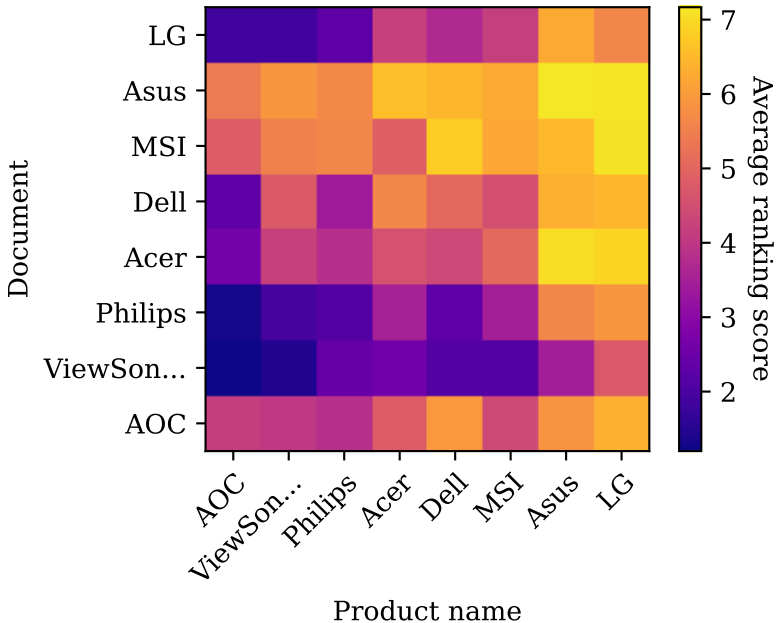

Supplement: software [file 2024.emnlp-main.534.software.zip]

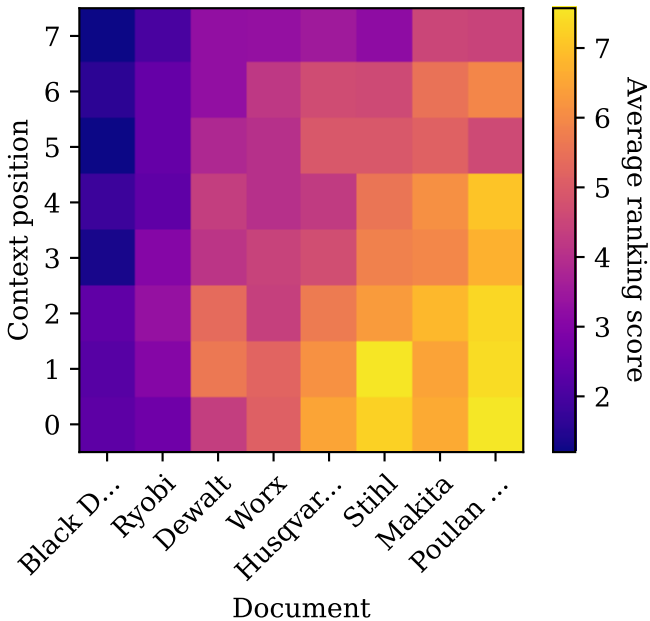

Supplement: software [file 2024.emnlp-main.534.software.zip]

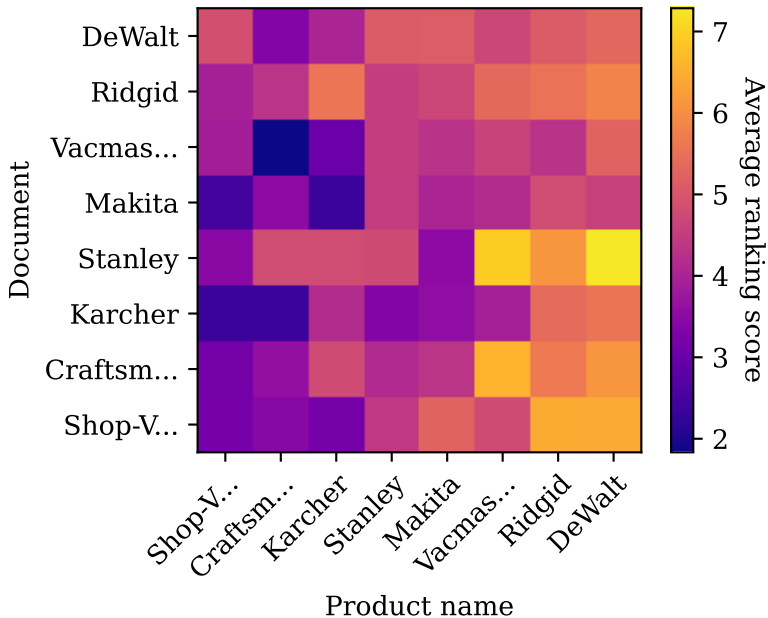

Supplement: software [file 2024.emnlp-main.534.software.zip]

Document

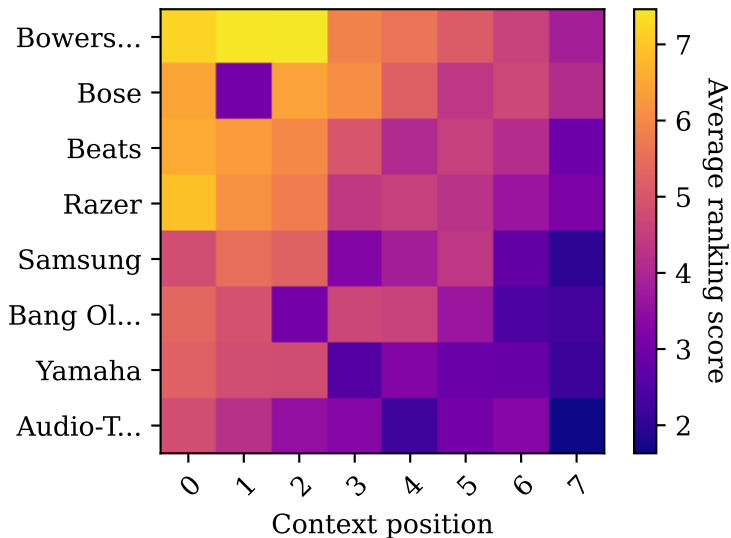

Supplement: software [file 2024.emnlp-main.534.software.zip]

Product name

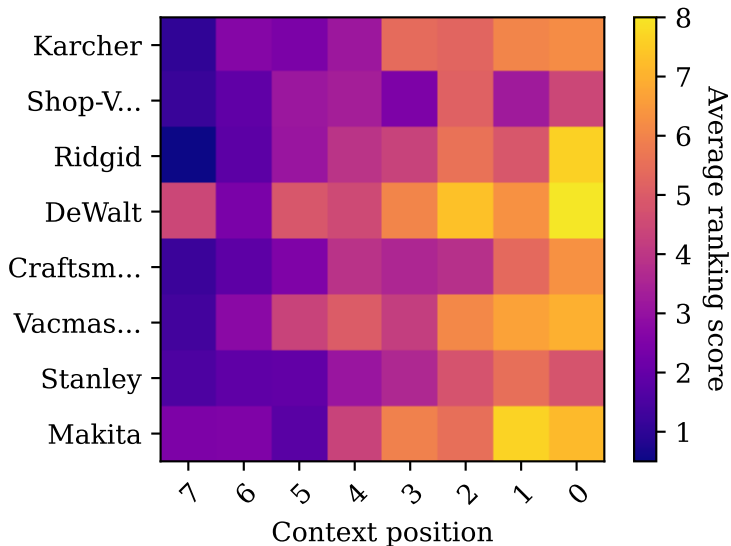

Supplement: software [file 2024.emnlp-main.534.software.zip]

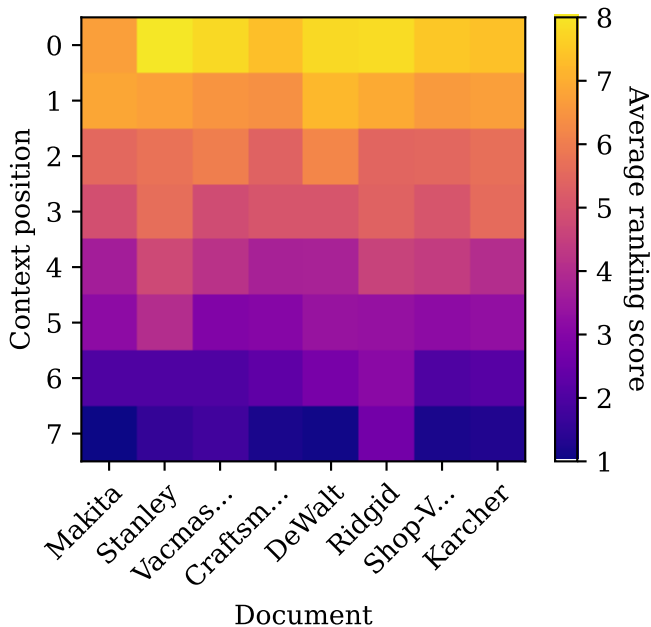

Supplement: software [file 2024.emnlp-main.534.software.zip]

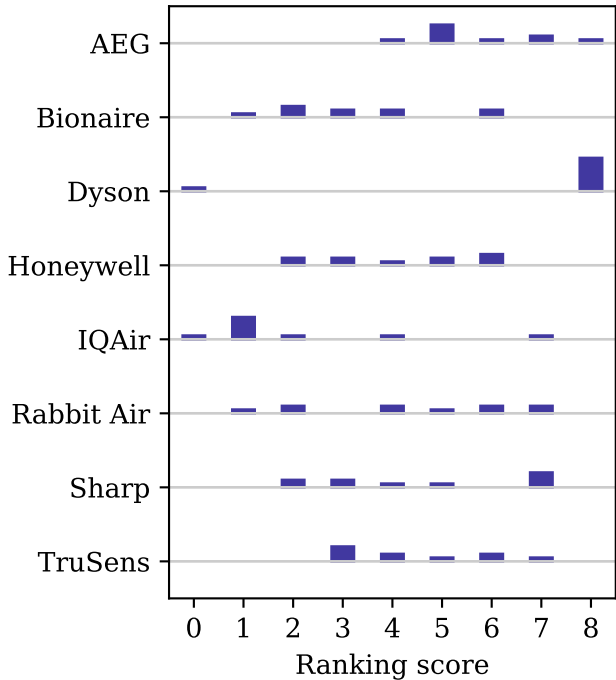

Supplement: software [file 2024.emnlp-main.534.software.zip]

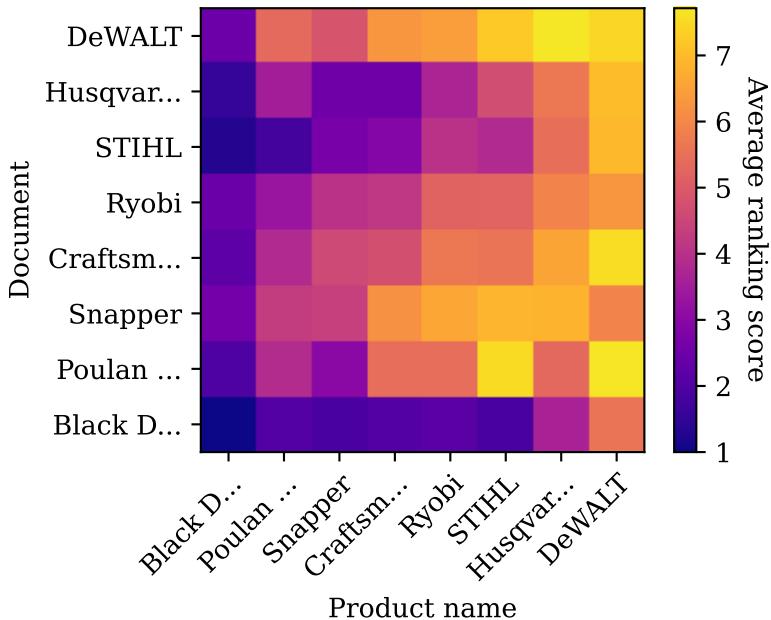

Supplement: software [file 2024.emnlp-main.534.software.zip]

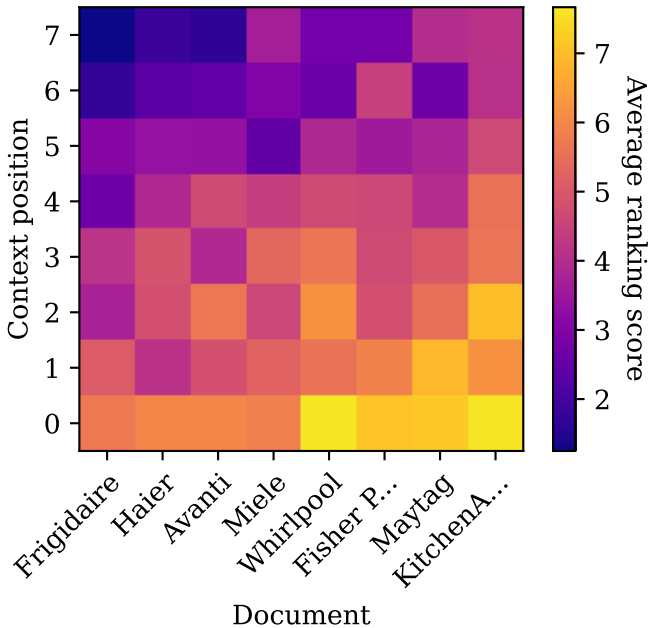

Supplement: software [file 2024.emnlp-main.534.software.zip]

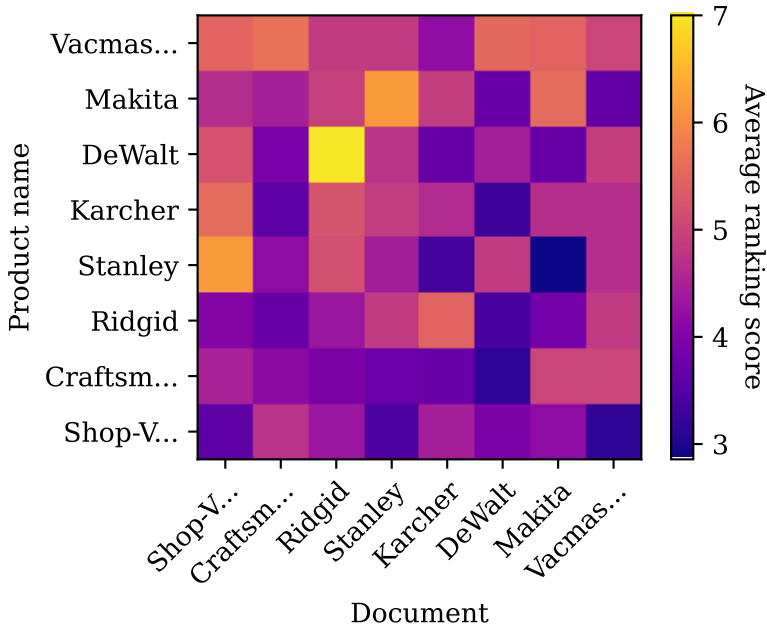

Supplement: software [file 2024.emnlp-main.534.software.zip]

Product name

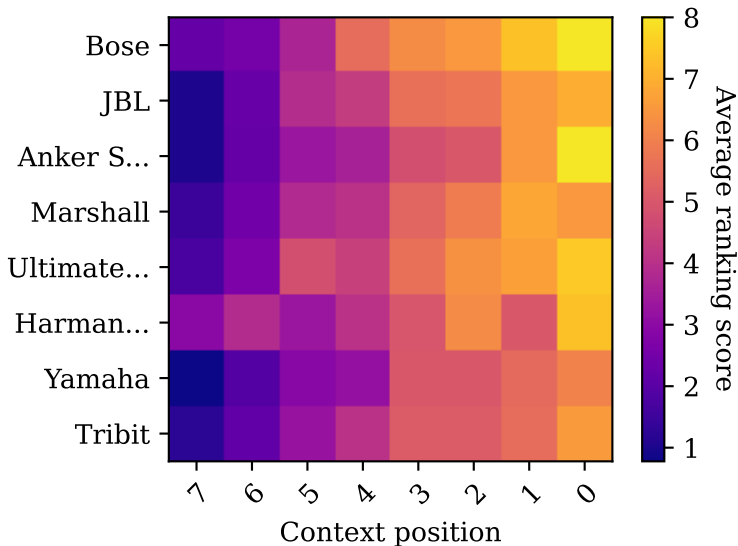

Supplement: software [file 2024.emnlp-main.534.software.zip]

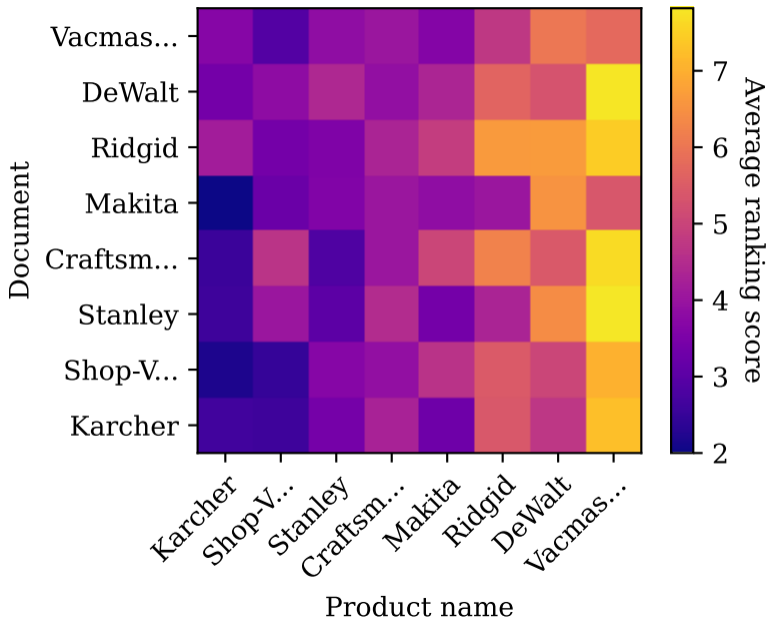

Supplement: software [file 2024.emnlp-main.534.software.zip]

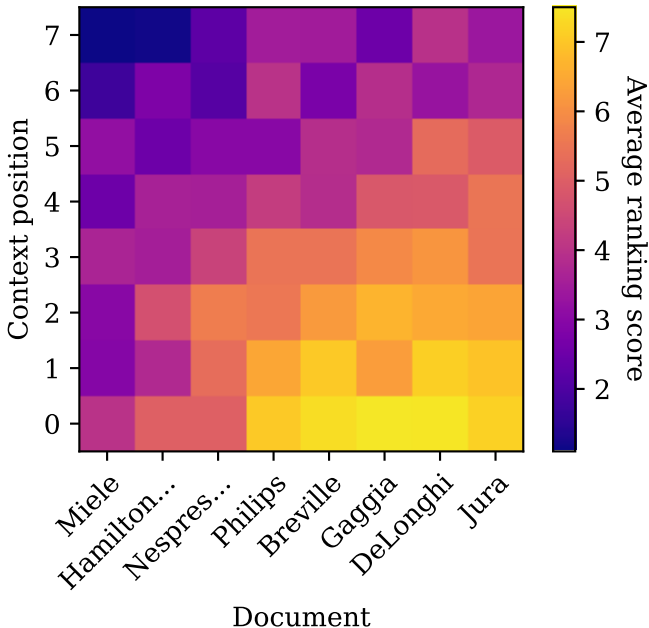

Supplement: software [file 2024.emnlp-main.534.software.zip]

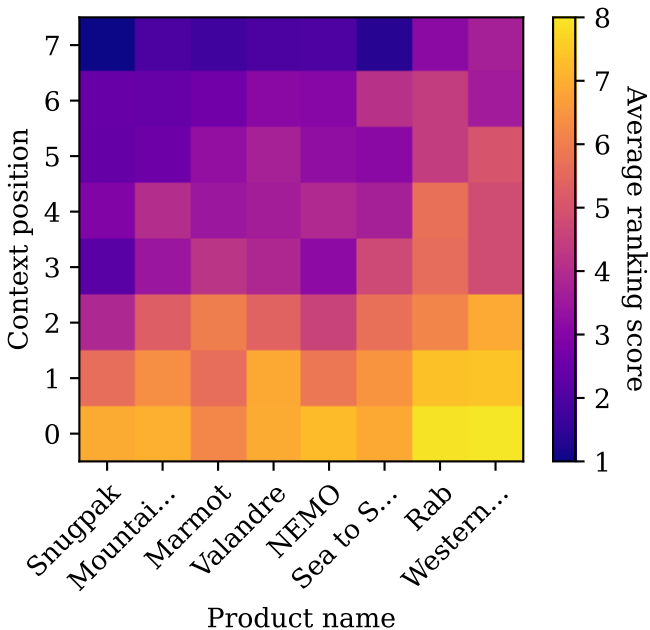

Supplement: software [file 2024.emnlp-main.534.software.zip]

Product name

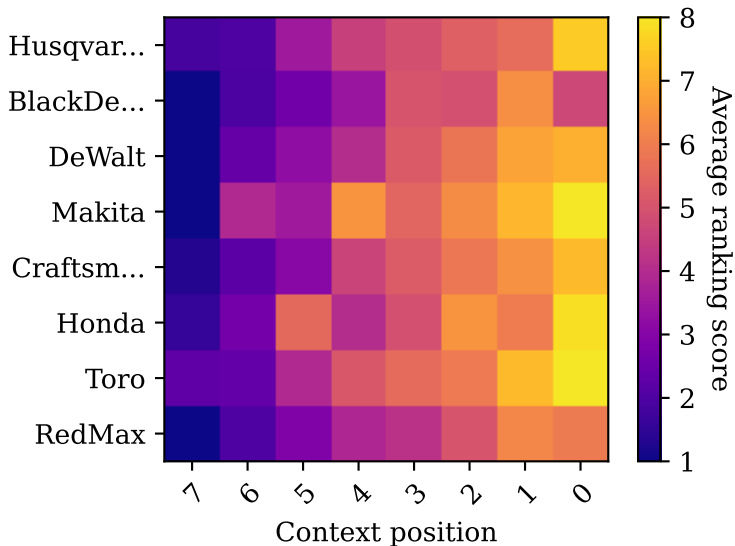

Supplement: software [file 2024.emnlp-main.534.software.zip]

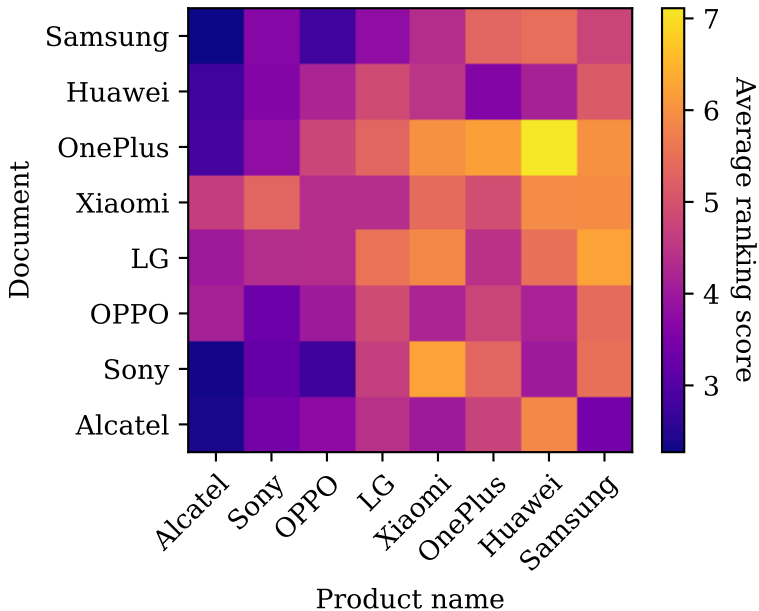

Supplement: software [file 2024.emnlp-main.534.software.zip]

Document

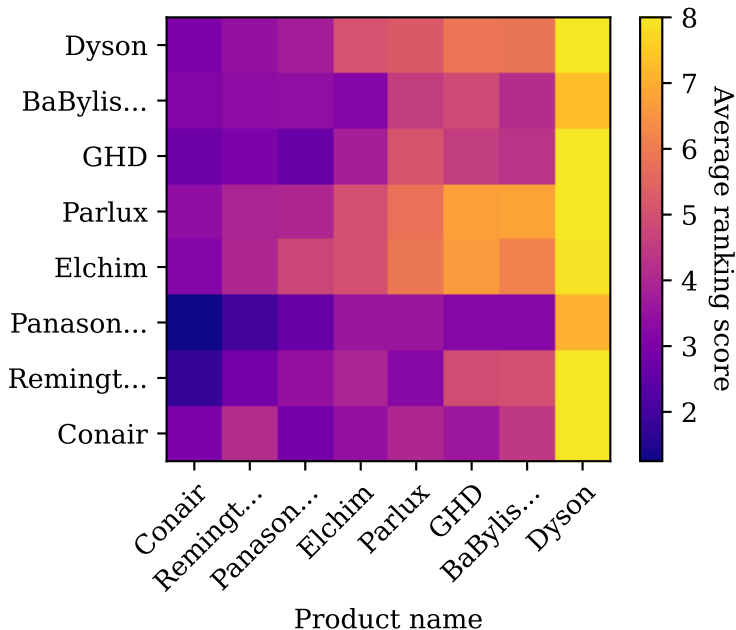

Supplement: software [file 2024.emnlp-main.534.software.zip]

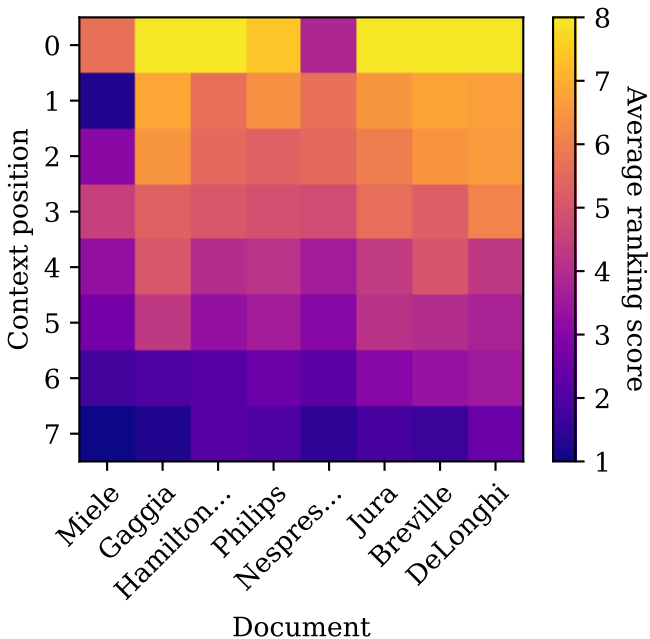

Supplement: software [file 2024.emnlp-main.534.software.zip]

Context position

7  
6  
5  
4  
3  
2  
1  
0

Alcatel  
CHUWI  
Acer  
LG  
Google  
Huawei  
Apple  
Samsung

Product name

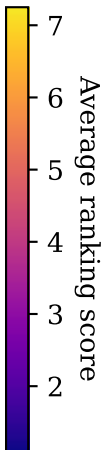

Supplement: software [file 2024.emnlp-main.534.software.zip]

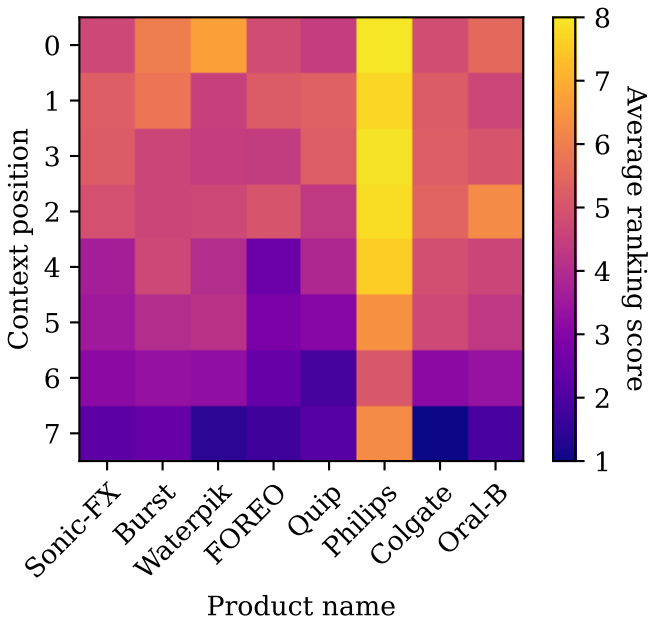

Supplement: software [file 2024.emnlp-main.534.software.zip]

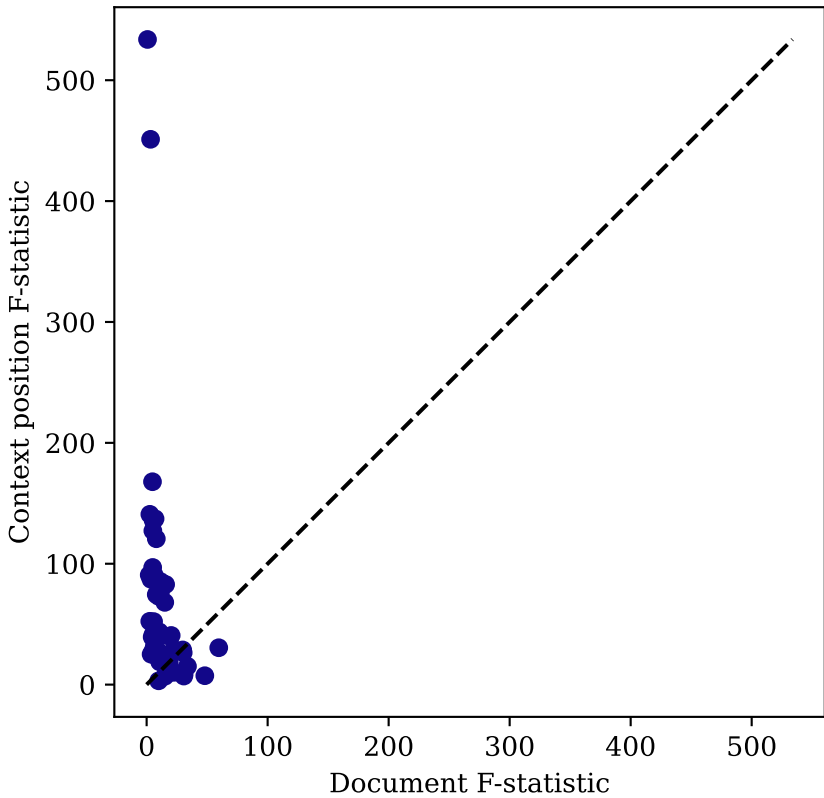

Supplement: software [file 2024.emnlp-main.534.software.zip]

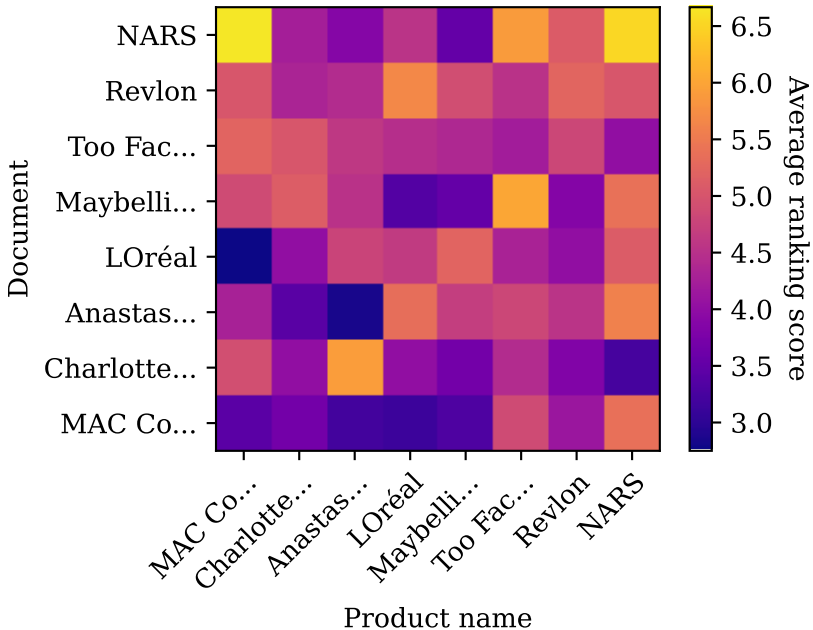

Supplement: software [file 2024.emnlp-main.534.software.zip]

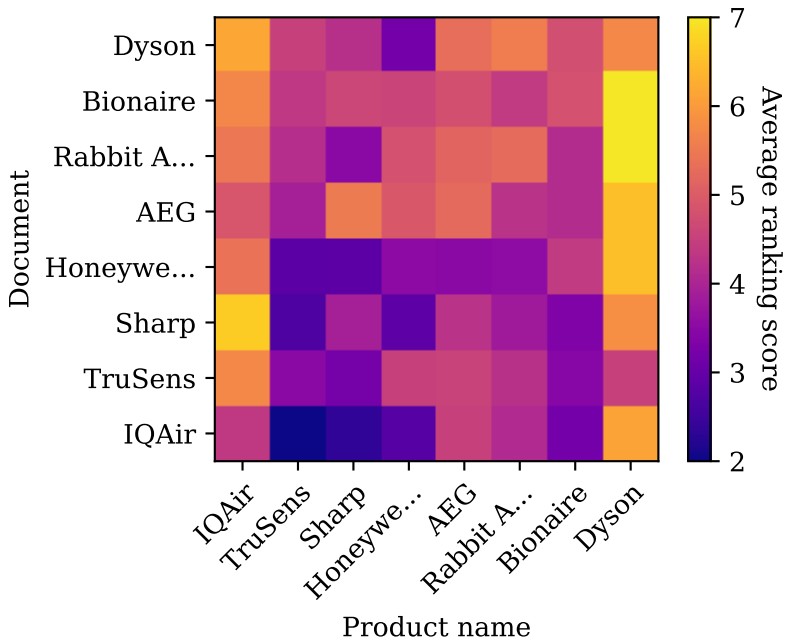

Supplement: software [file 2024.emnlp-main.534.software.zip]

Context position

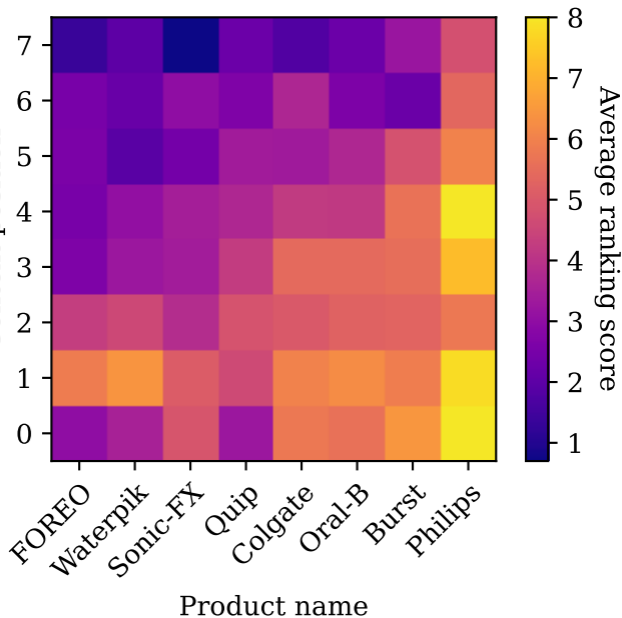

Supplement: software [file 2024.emnlp-main.534.software.zip]

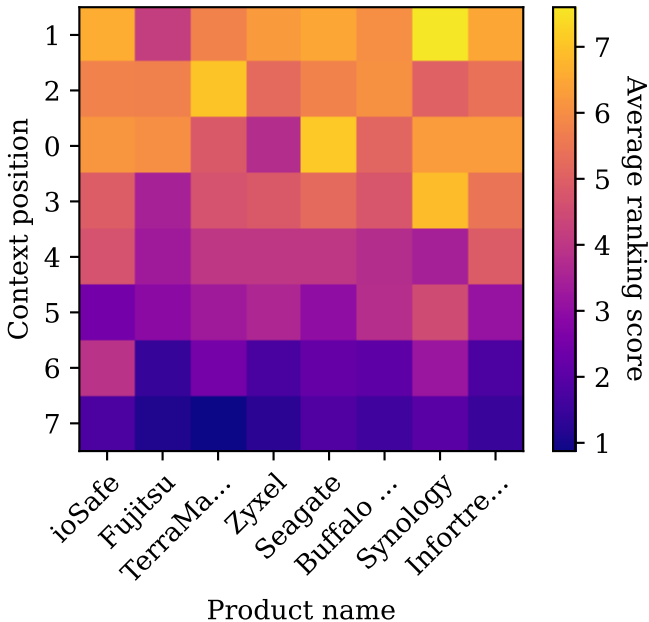

Supplement: software [file 2024.emnlp-main.534.software.zip]

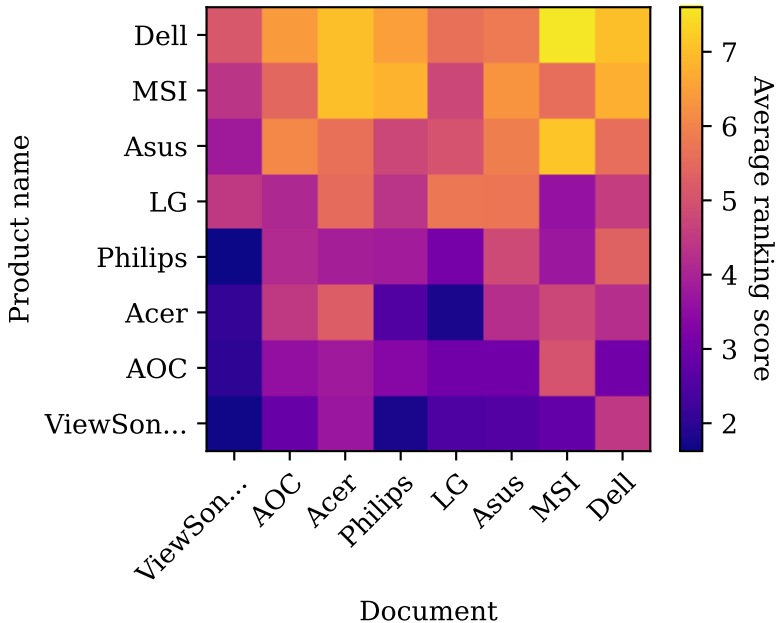

Supplement: software [file 2024.emnlp-main.534.software.zip]

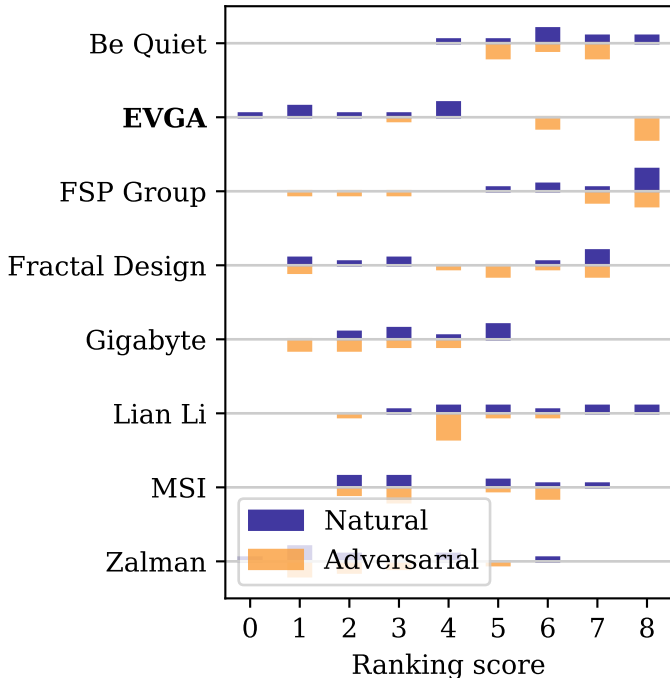

Supplement: software [file 2024.emnlp-main.534.software.zip]

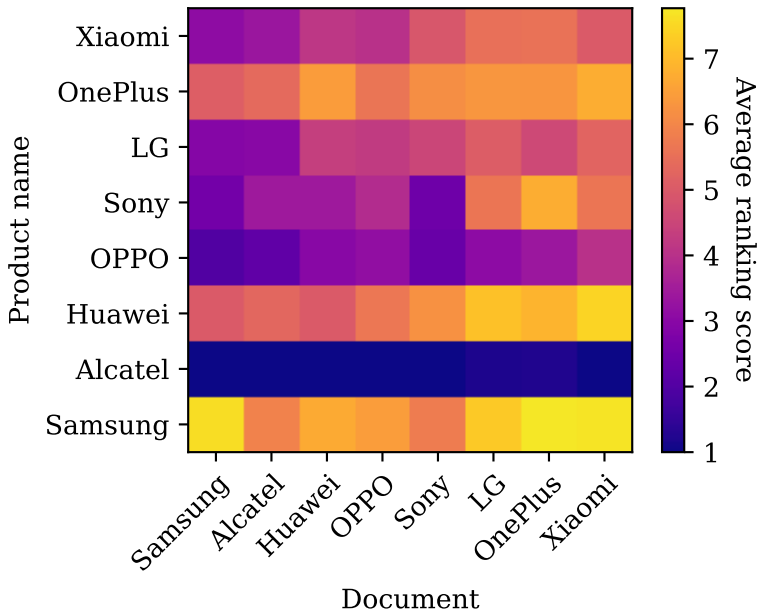

Supplement: software [file 2024.emnlp-main.534.software.zip]

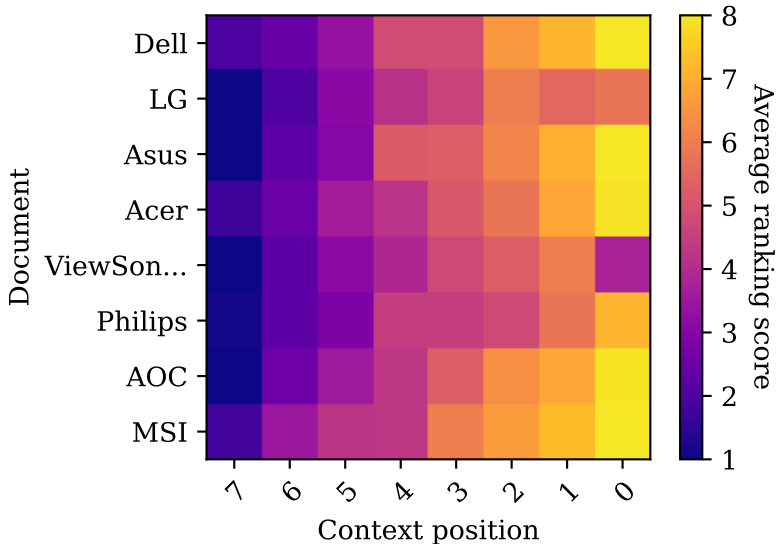

Supplement: software [file 2024.emnlp-main.534.software.zip]

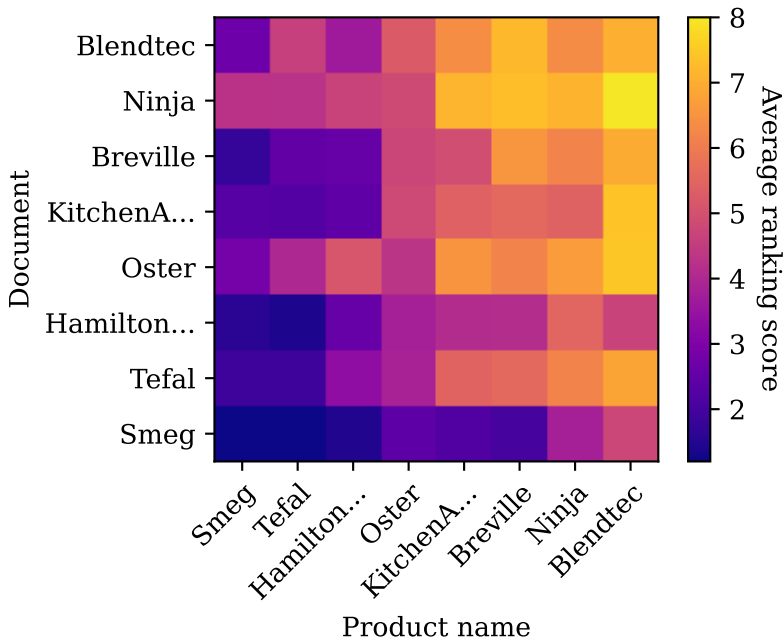

Supplement: software [file 2024.emnlp-main.534.software.zip]

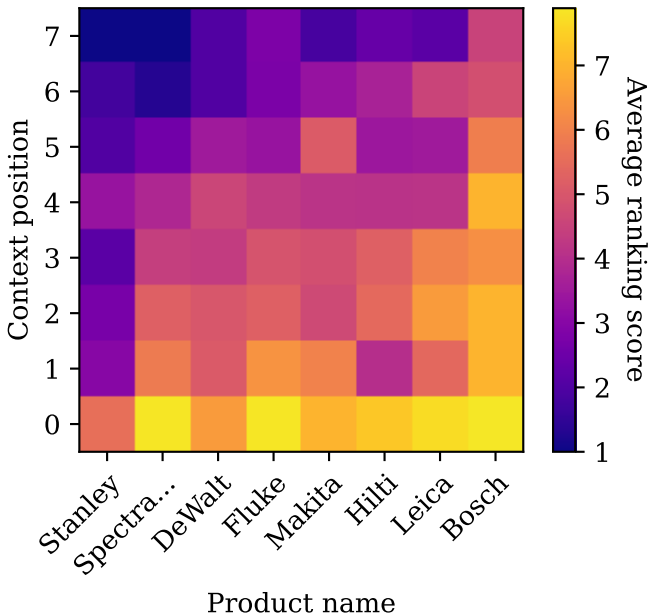

Supplement: software [file 2024.emnlp-main.534.software.zip]

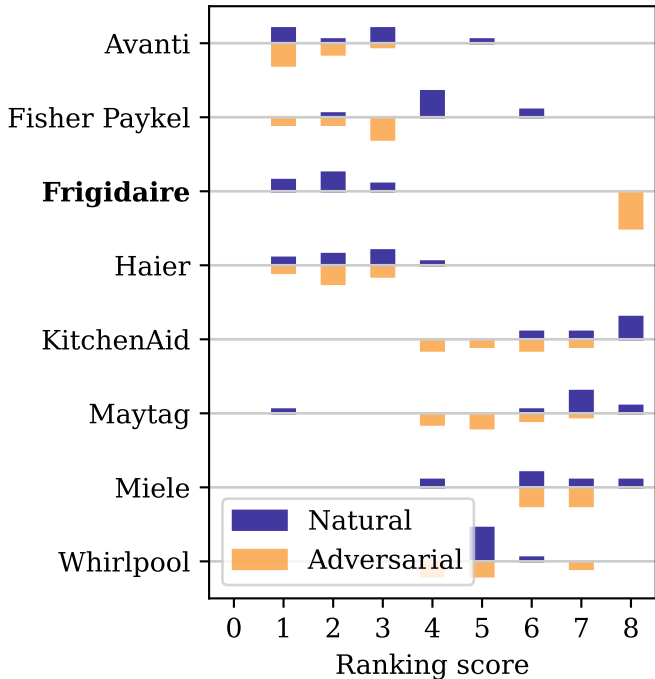

Supplement: software [file 2024.emnlp-main.534.software.zip]

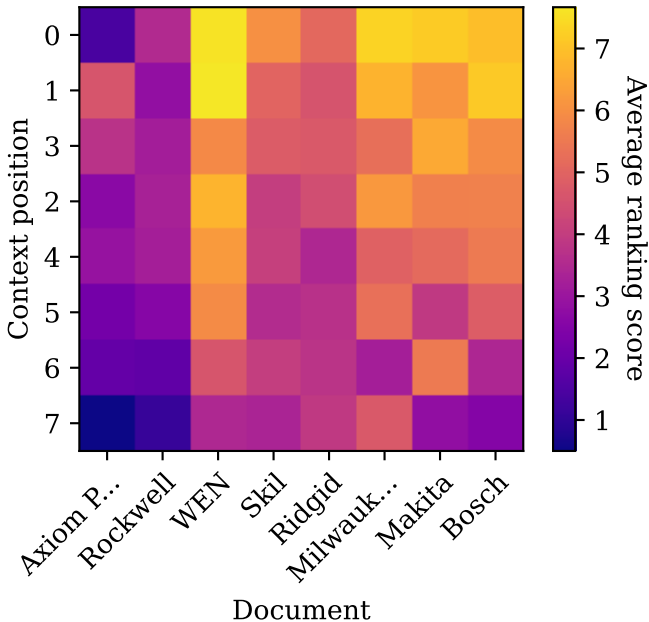

Supplement: software [file 2024.emnlp-main.534.software.zip]

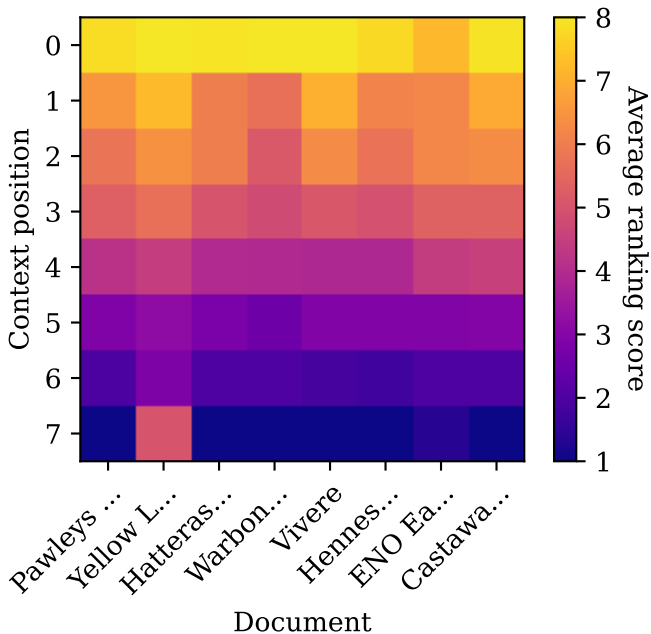

Supplement: software [file 2024.emnlp-main.534.software.zip]

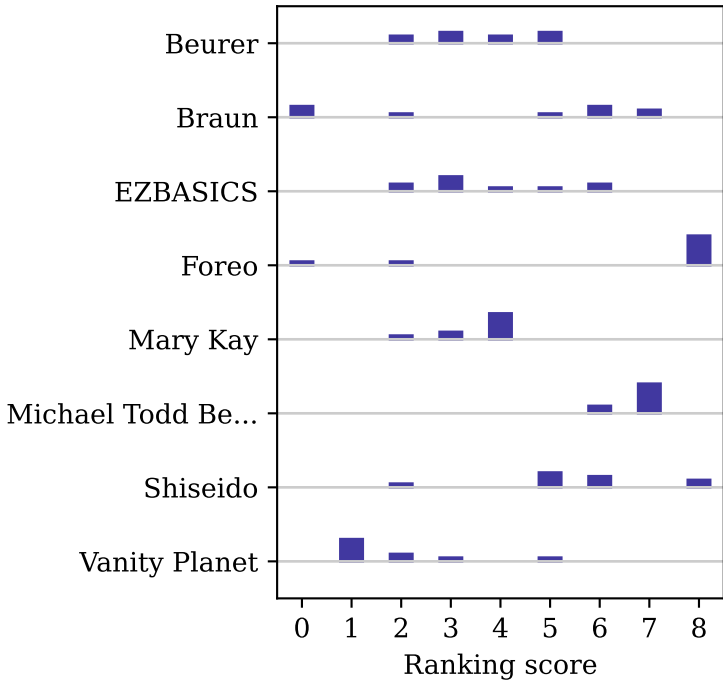

Supplement: software [file 2024.emnlp-main.534.software.zip]

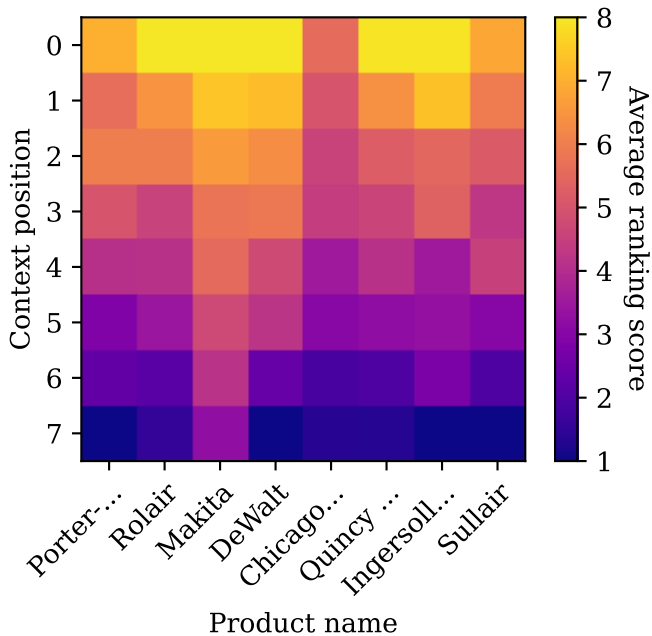

Supplement: software [file 2024.emnlp-main.534.software.zip]

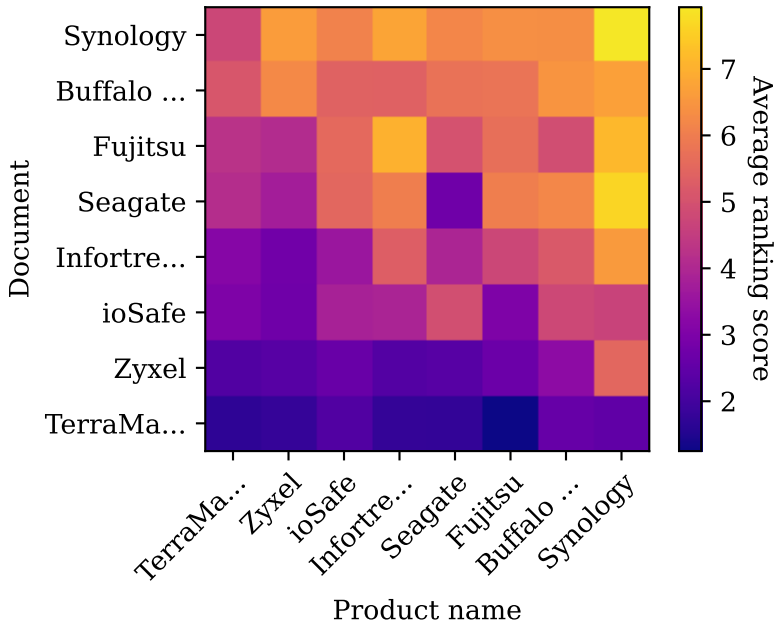

Supplement: software [file 2024.emnlp-main.534.software.zip]

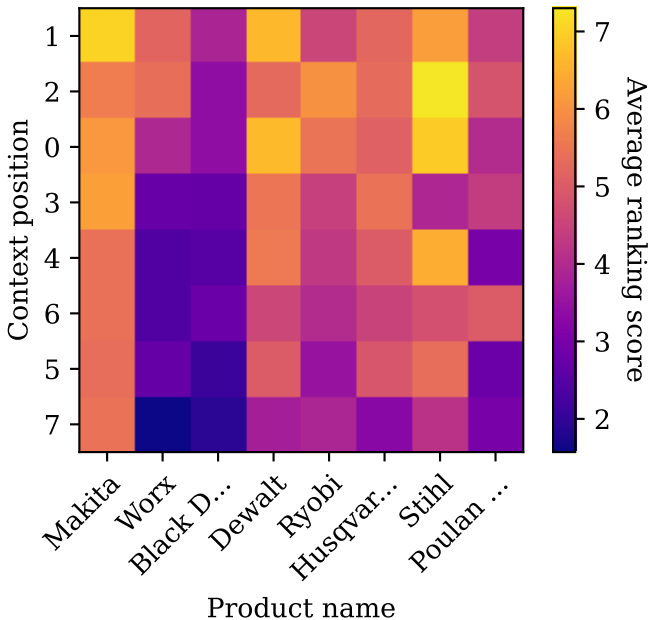

Supplement: software [file 2024.emnlp-main.534.software.zip]

Product name

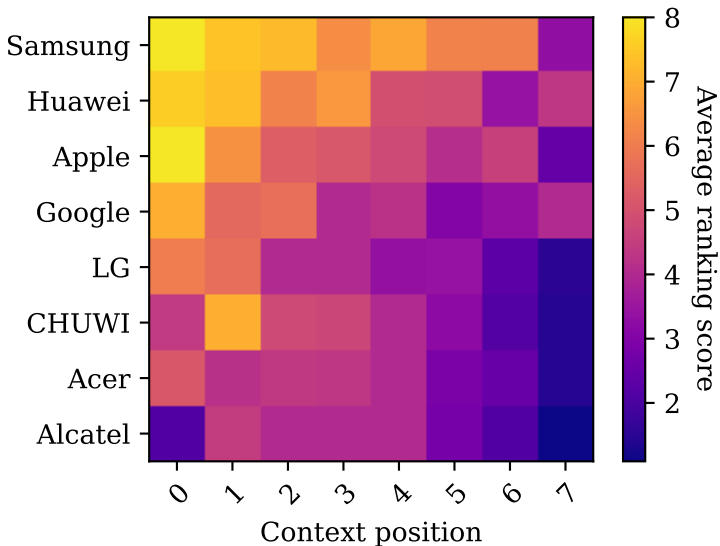

Supplement: software [file 2024.emnlp-main.534.software.zip]

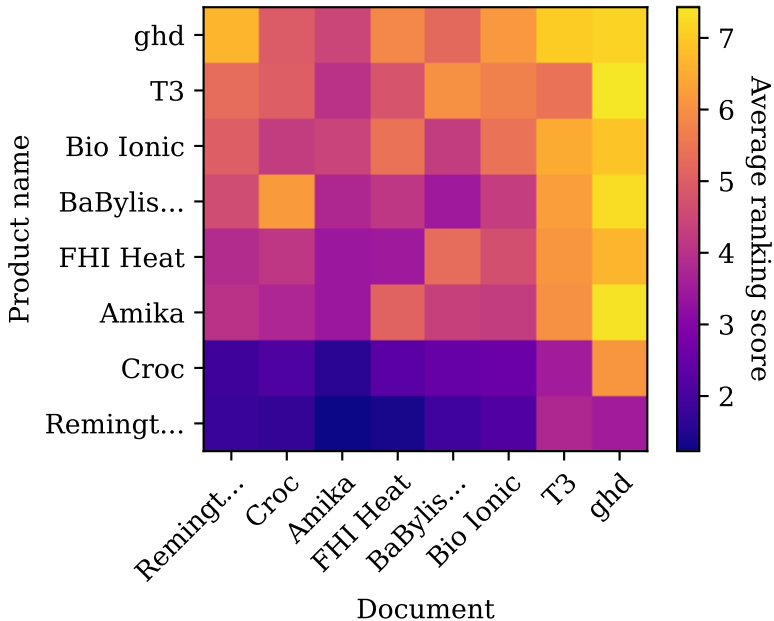

Supplement: software [file 2024.emnlp-main.534.software.zip]

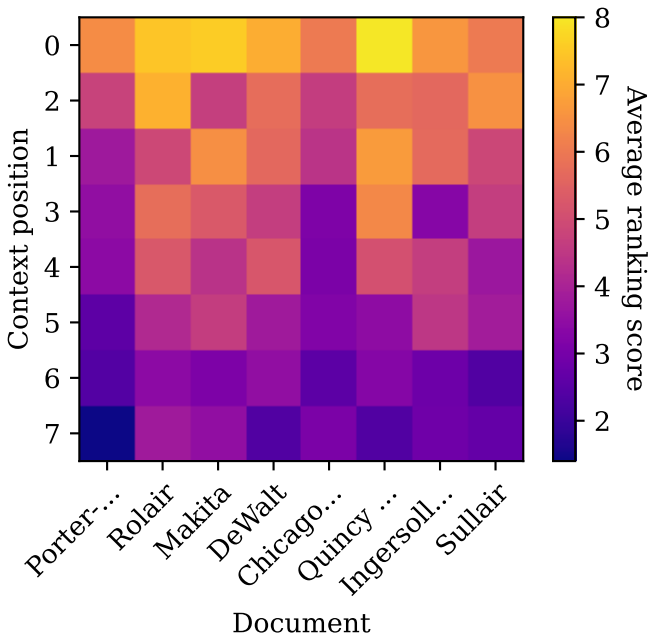

Supplement: software [file 2024.emnlp-main.534.software.zip]

Product name

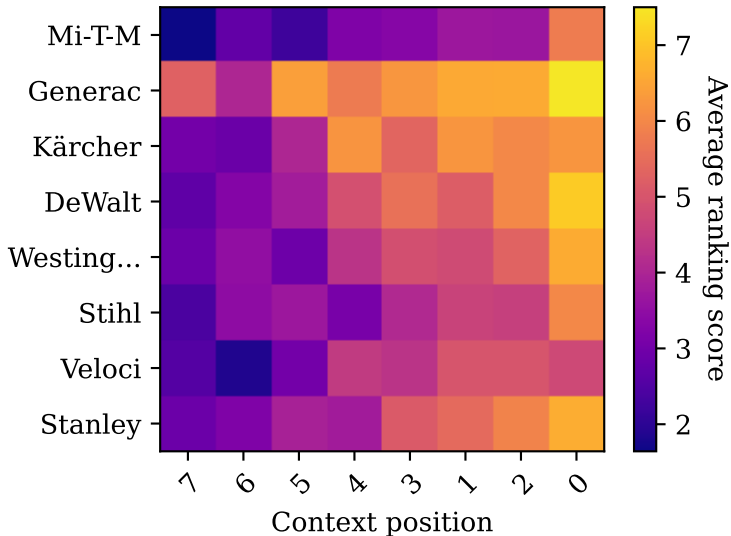

Supplement: software [file 2024.emnlp-main.534.software.zip]

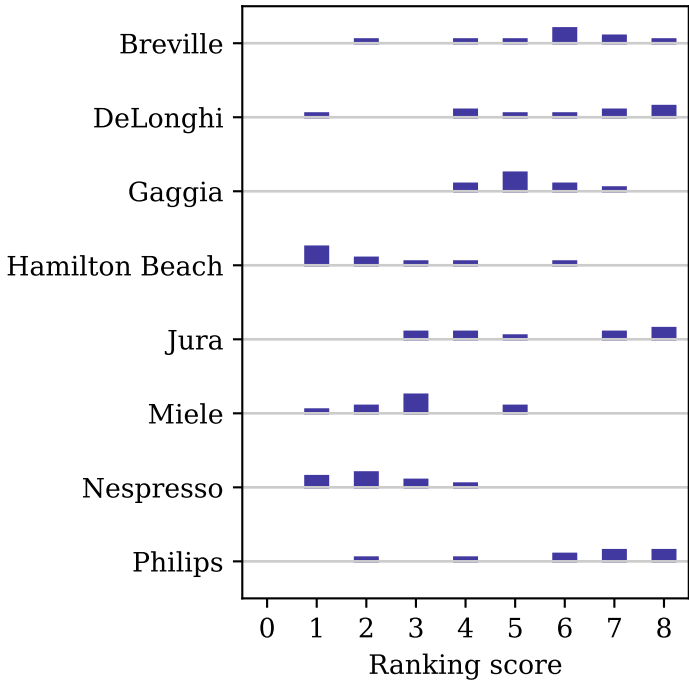

Supplement: software [file 2024.emnlp-main.534.software.zip]

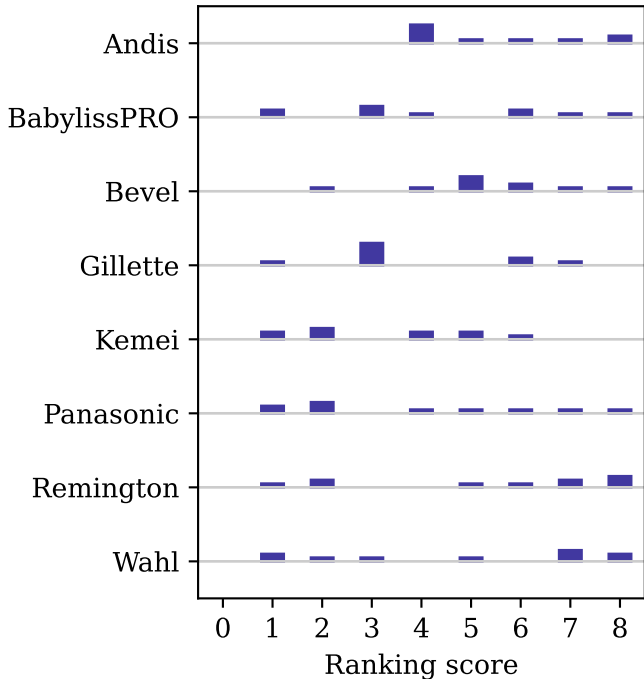

Supplement: software [file 2024.emnlp-main.534.software.zip]

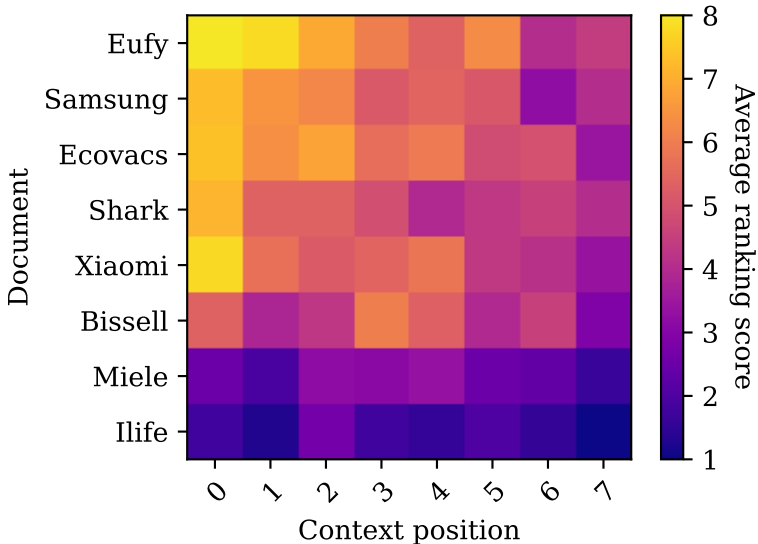

Supplement: software [file 2024.emnlp-main.534.software.zip]

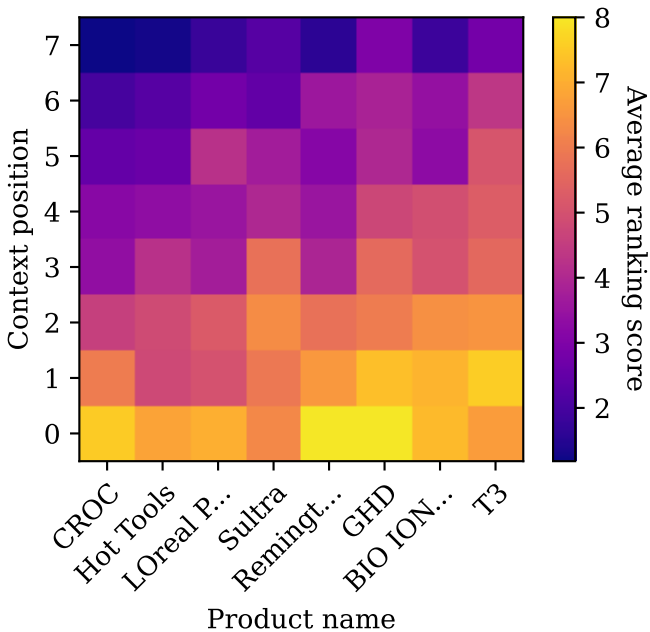

Supplement: software [file 2024.emnlp-main.534.software.zip]

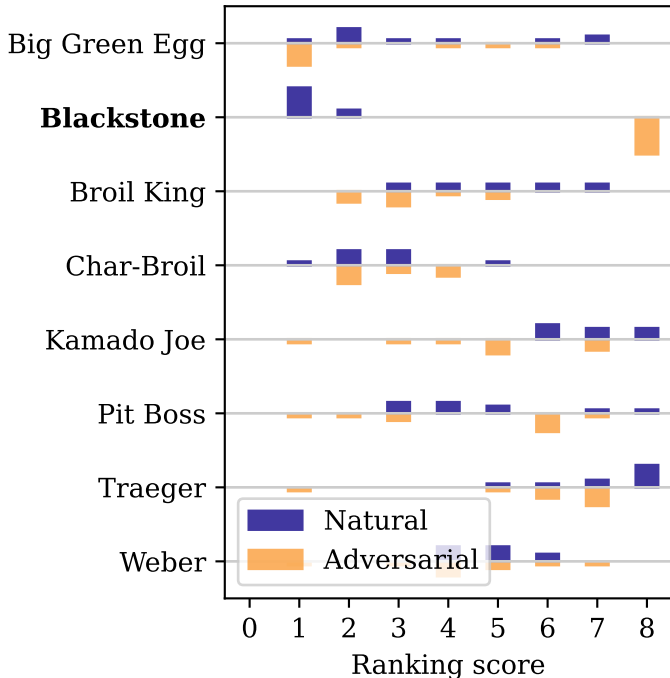

Supplement: software [file 2024.emnlp-main.534.software.zip]

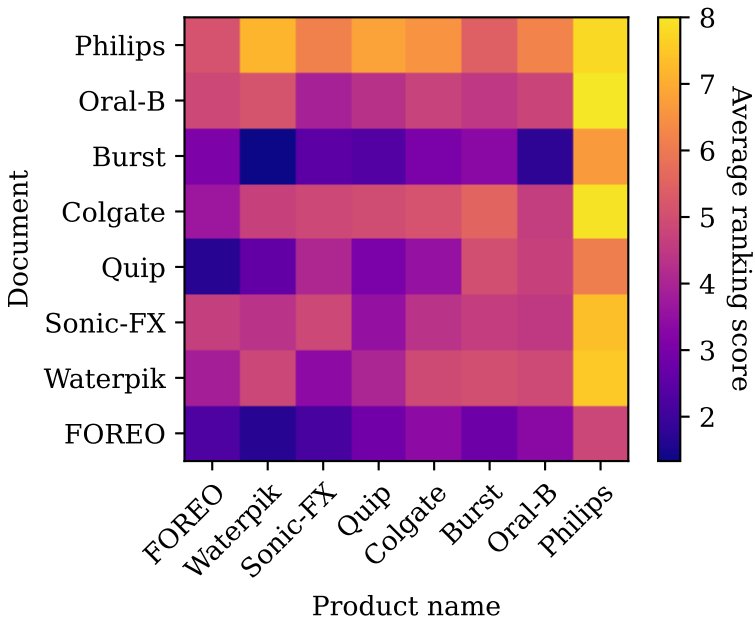

Supplement: software [file 2024.emnlp-main.534.software.zip]
