# Supplementary material (part 5 of 28)
Source: ML conference proceedings conference paper supplement (https://aclanthology.org/2024.emnlp-main.534)

Product name

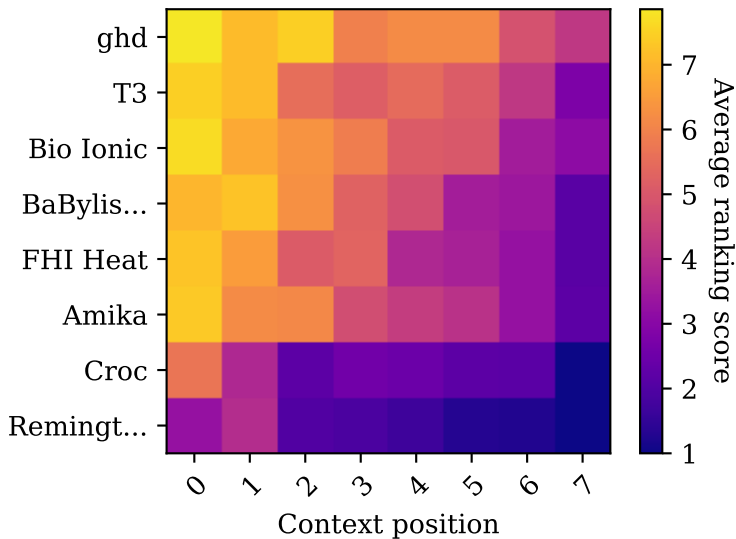

Supplement: software [file 2024.emnlp-main.534.software.zip]

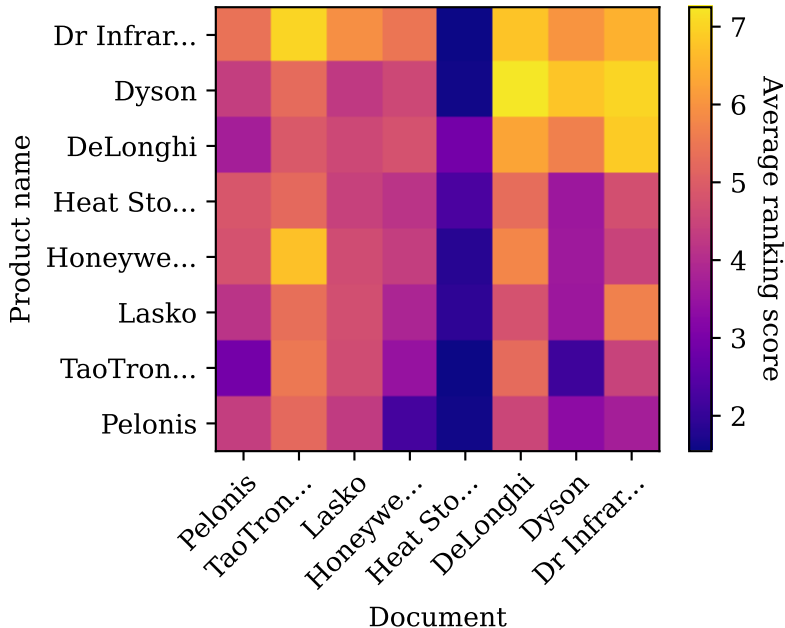

Supplement: software [file 2024.emnlp-main.534.software.zip]

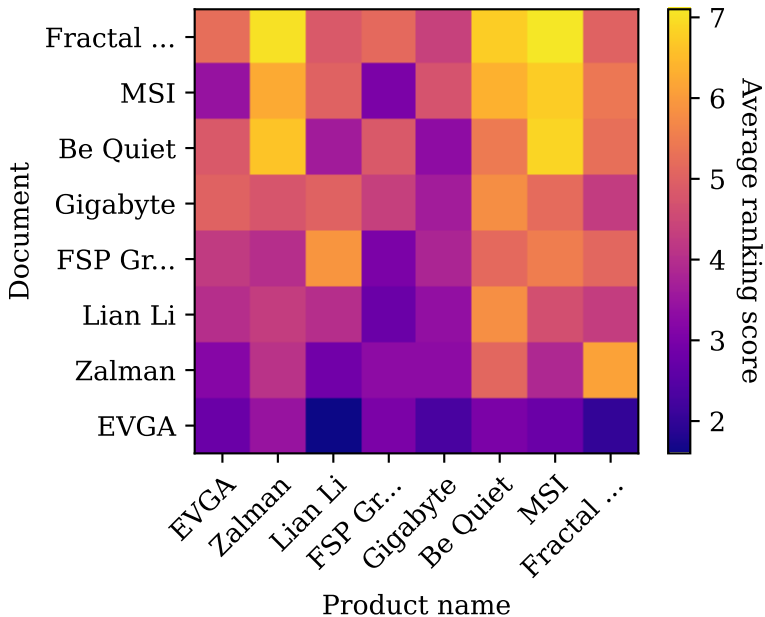

Supplement: software [file 2024.emnlp-main.534.software.zip]

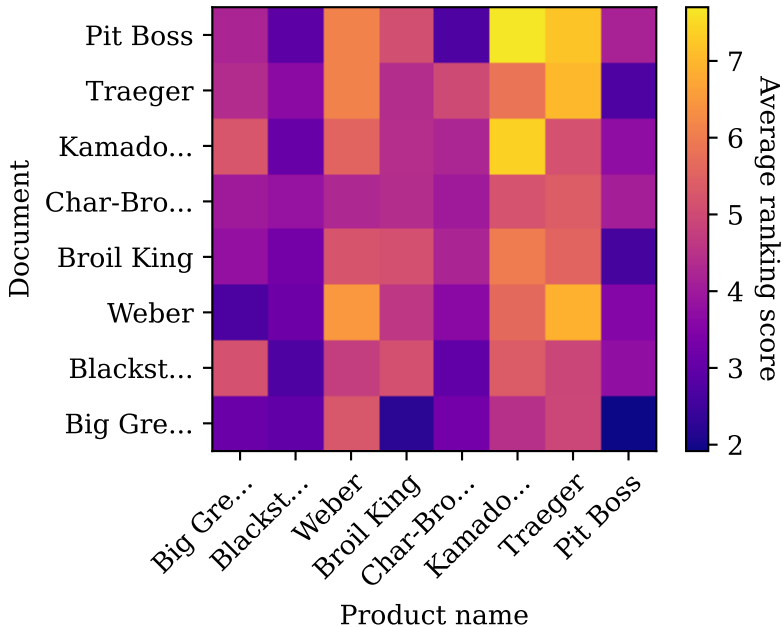

Supplement: software [file 2024.emnlp-main.534.software.zip]

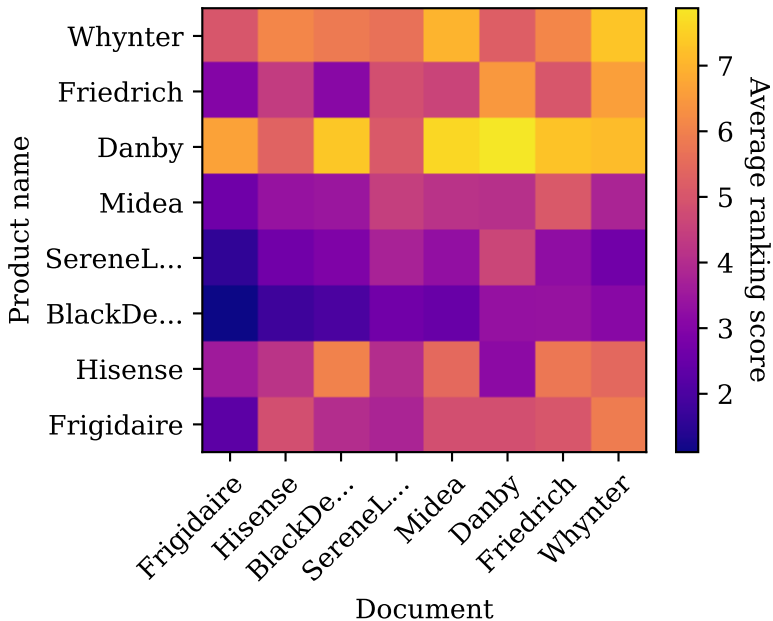

Supplement: software [file 2024.emnlp-main.534.software.zip]

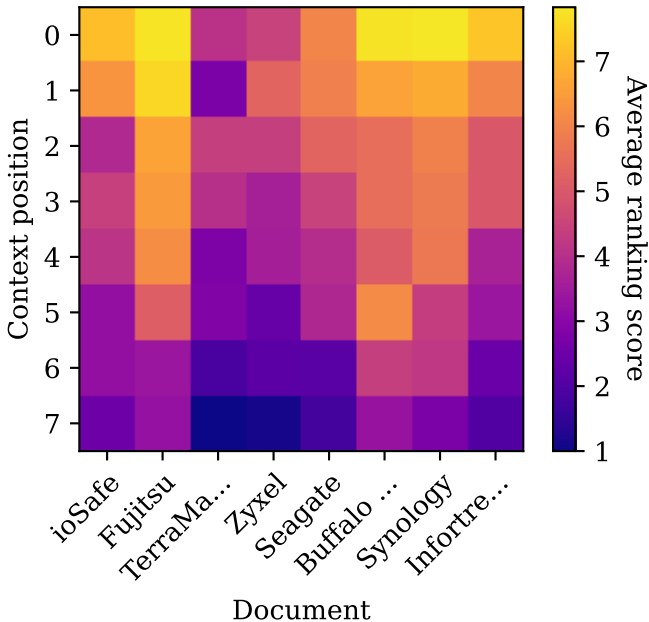

Supplement: software [file 2024.emnlp-main.534.software.zip]

Product name

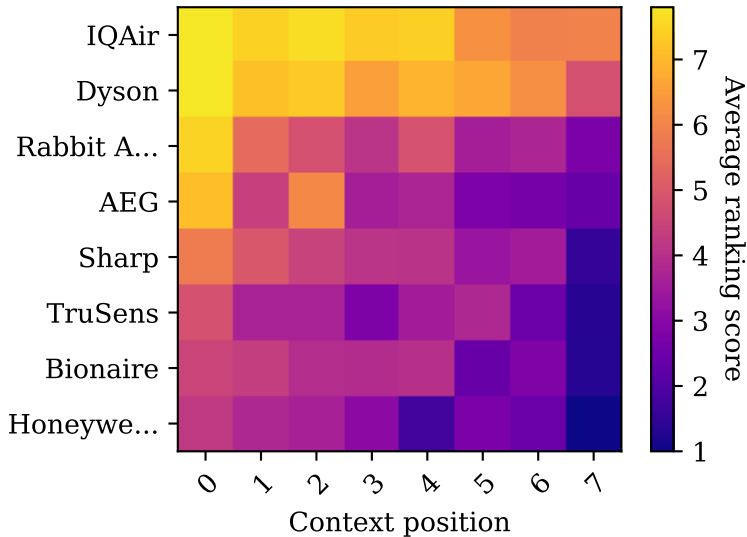

Supplement: software [file 2024.emnlp-main.534.software.zip]

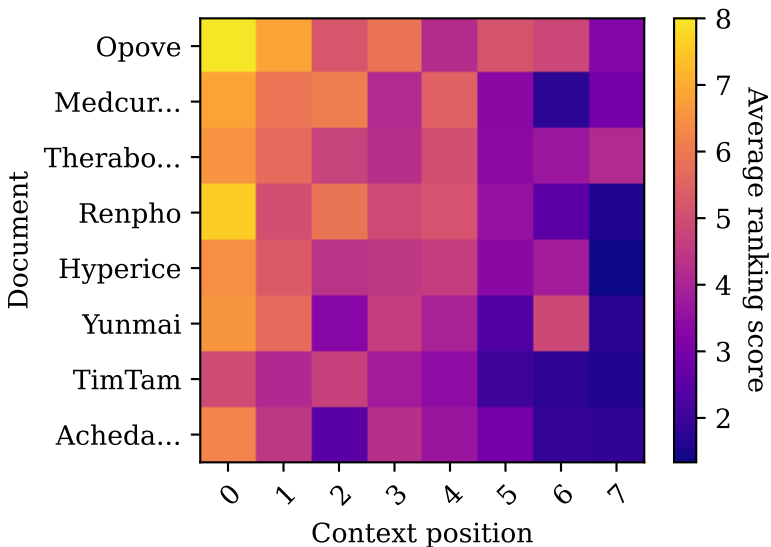

Supplement: software [file 2024.emnlp-main.534.software.zip]

Document

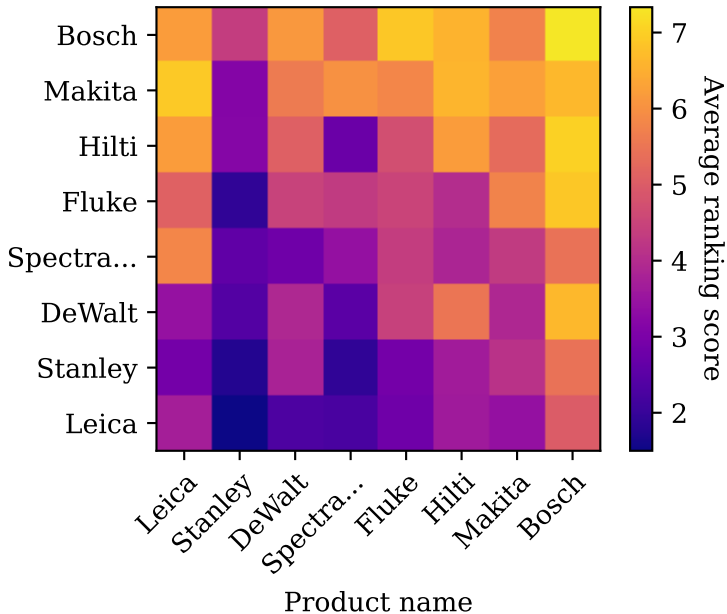

Supplement: software [file 2024.emnlp-main.534.software.zip]

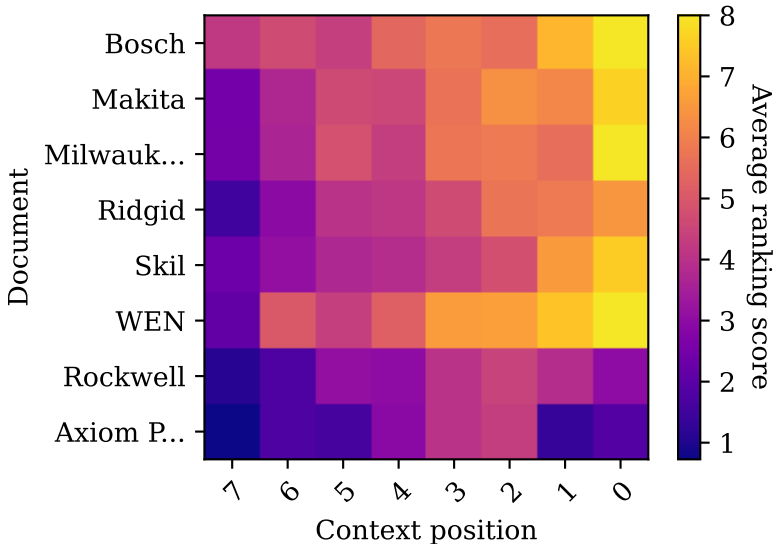

Supplement: software [file 2024.emnlp-main.534.software.zip]

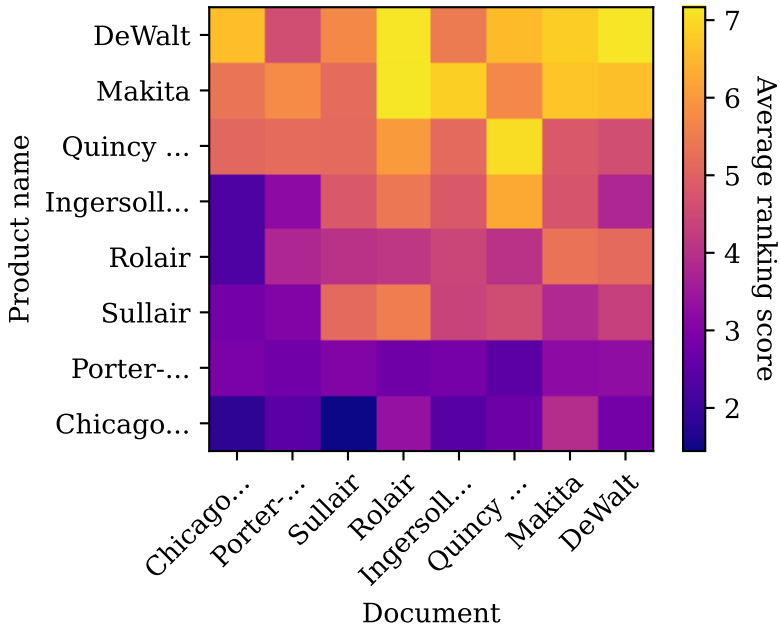

Supplement: software [file 2024.emnlp-main.534.software.zip]

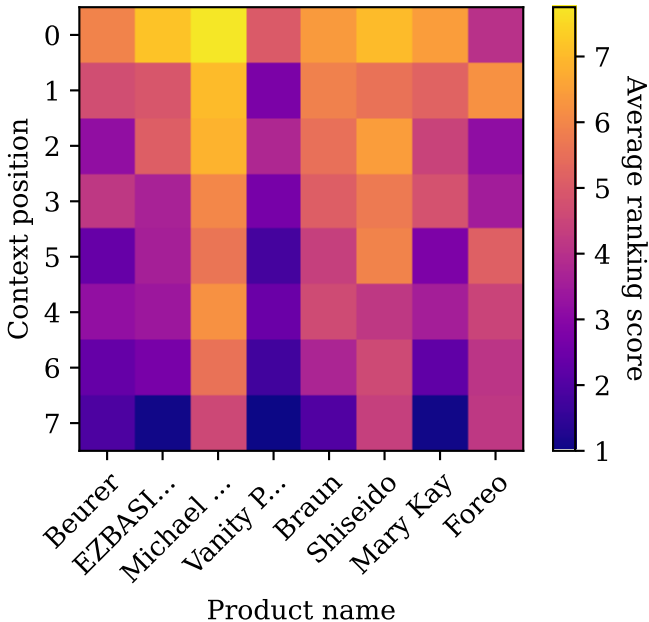

Supplement: software [file 2024.emnlp-main.534.software.zip]

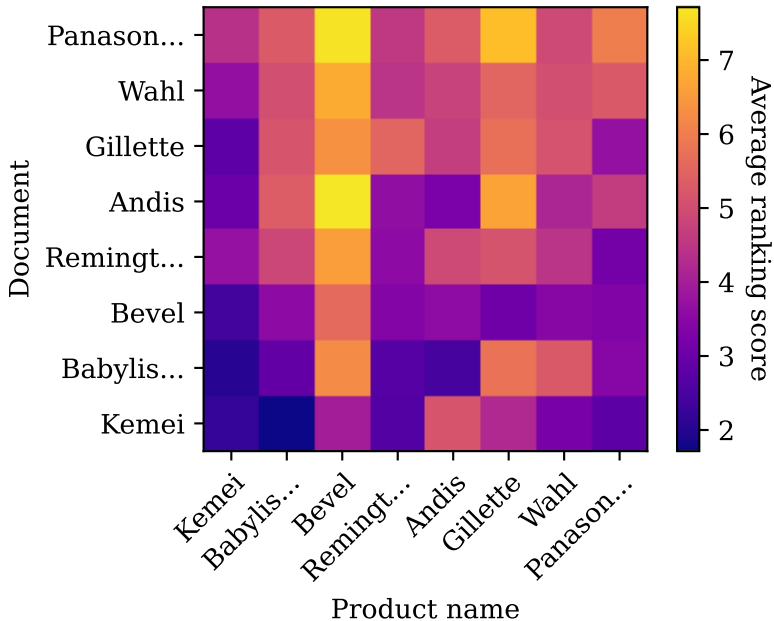

Supplement: software [file 2024.emnlp-main.534.software.zip]

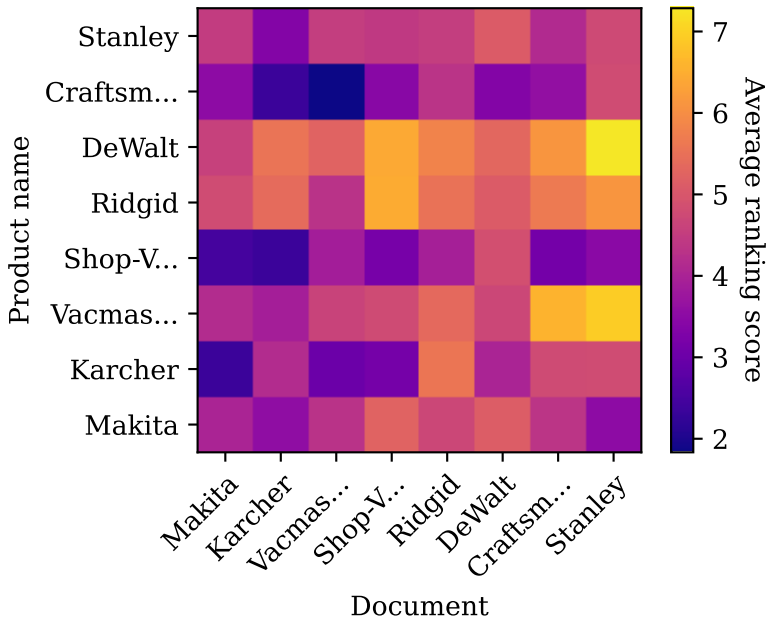

Supplement: software [file 2024.emnlp-main.534.software.zip]

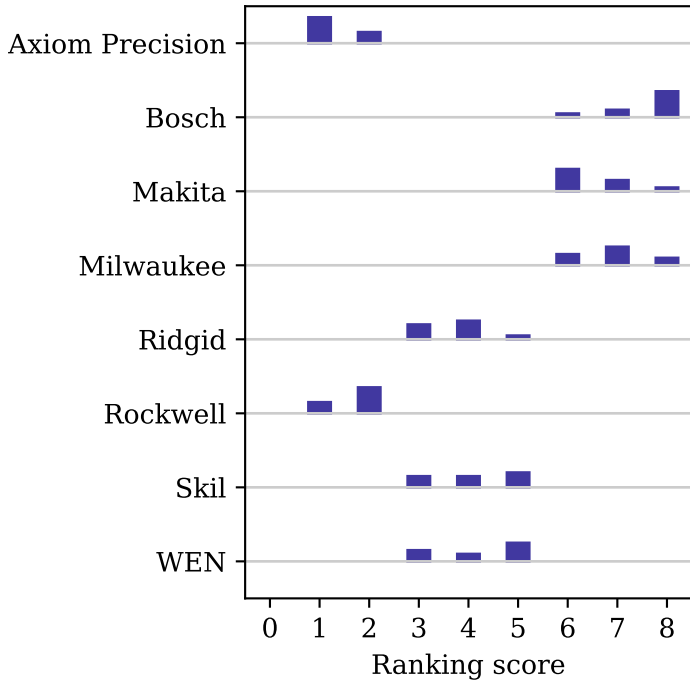

Supplement: software [file 2024.emnlp-main.534.software.zip]

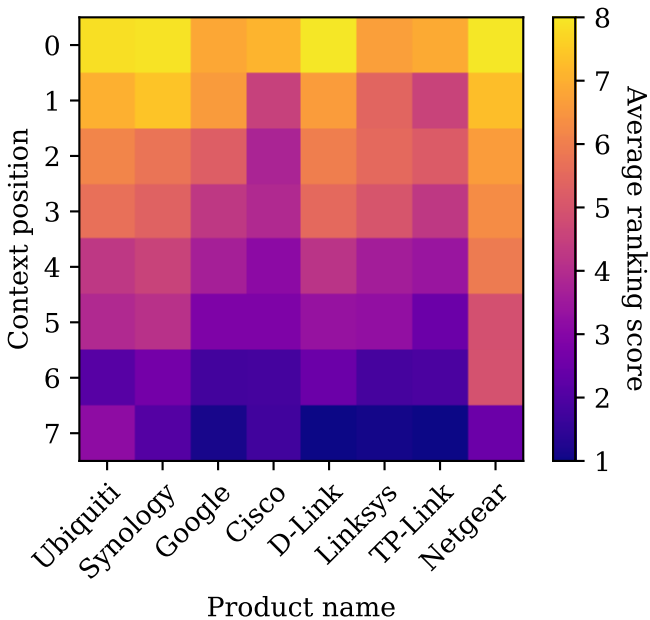

Supplement: software [file 2024.emnlp-main.534.software.zip]

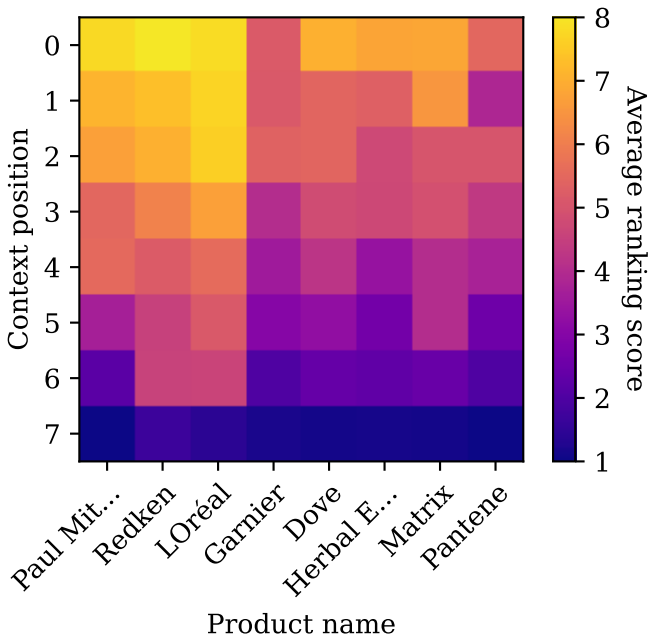

Supplement: software [file 2024.emnlp-main.534.software.zip]

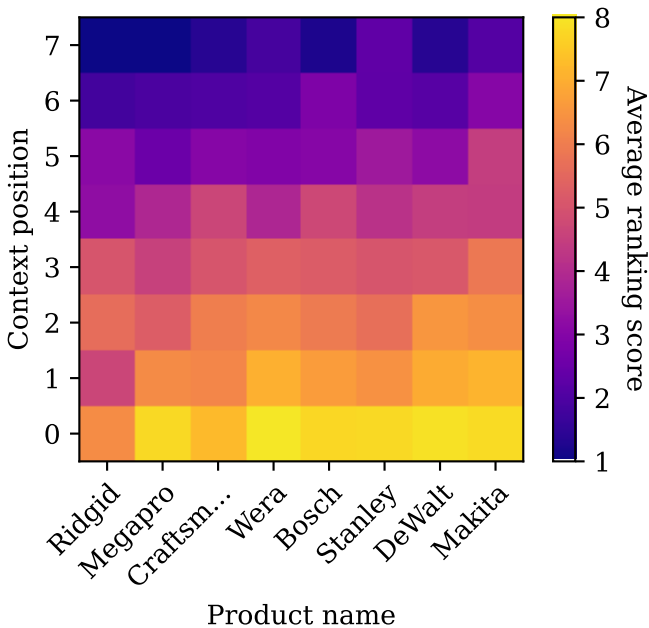

Supplement: software [file 2024.emnlp-main.534.software.zip]

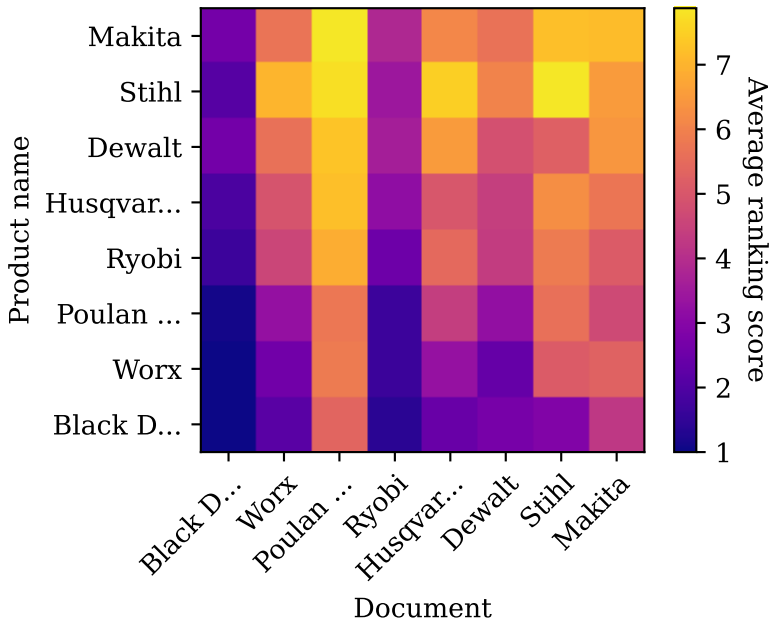

Supplement: software [file 2024.emnlp-main.534.software.zip]

Document

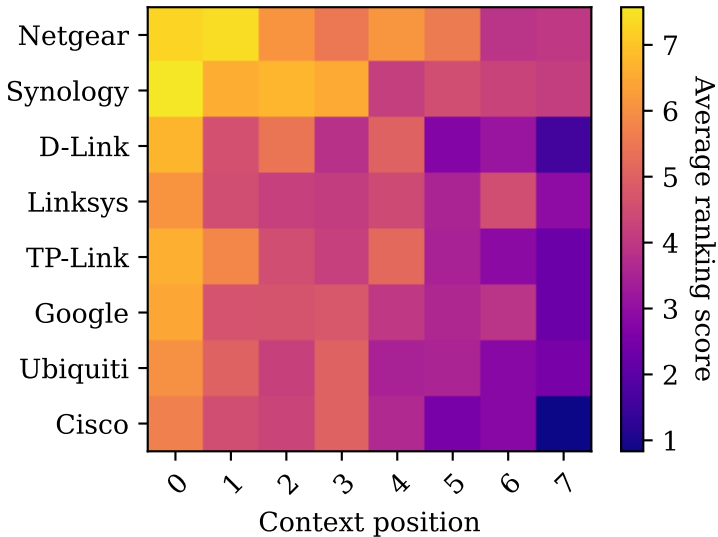

Supplement: software [file 2024.emnlp-main.534.software.zip]

Product name

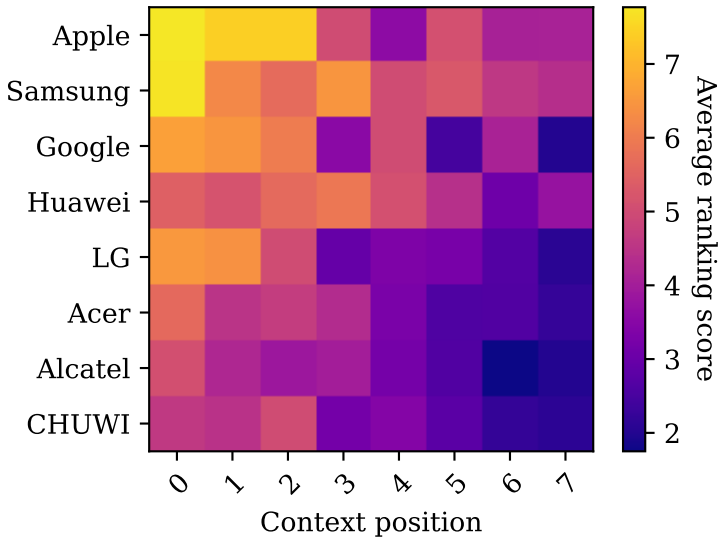

Supplement: software [file 2024.emnlp-main.534.software.zip]

Product name

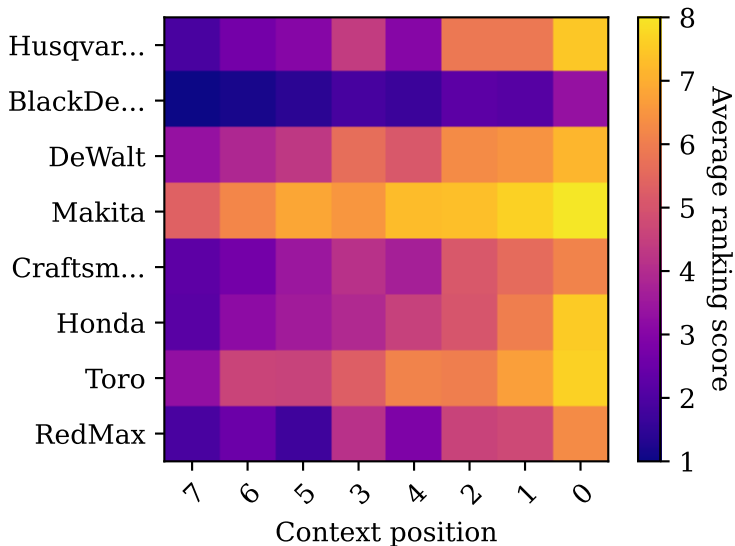

Supplement: software [file 2024.emnlp-main.534.software.zip]

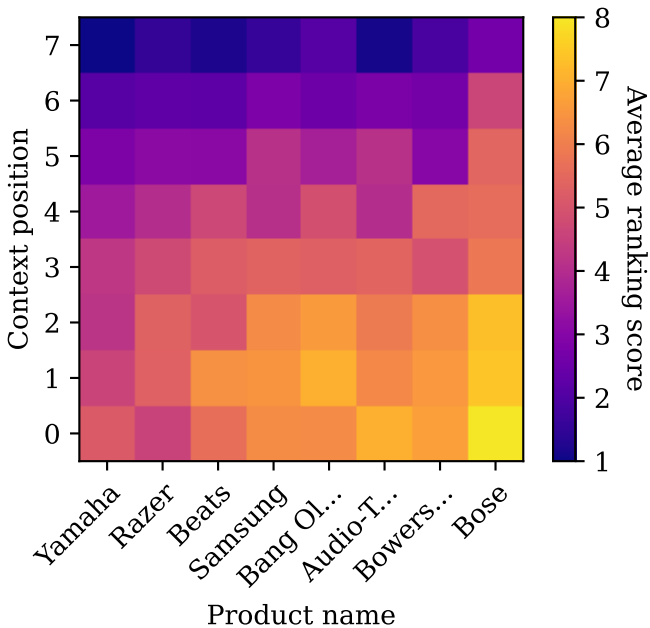

Supplement: software [file 2024.emnlp-main.534.software.zip]

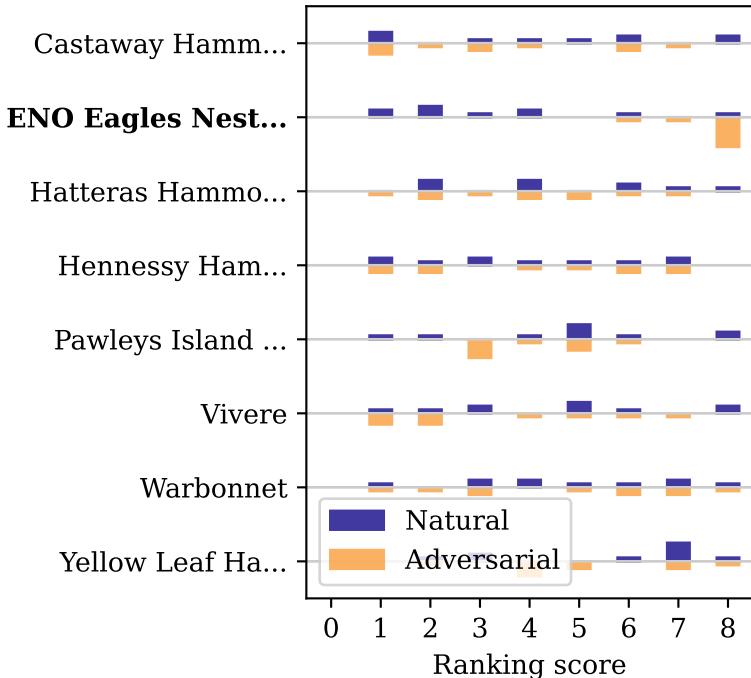

Supplement: software [file 2024.emnlp-main.534.software.zip]

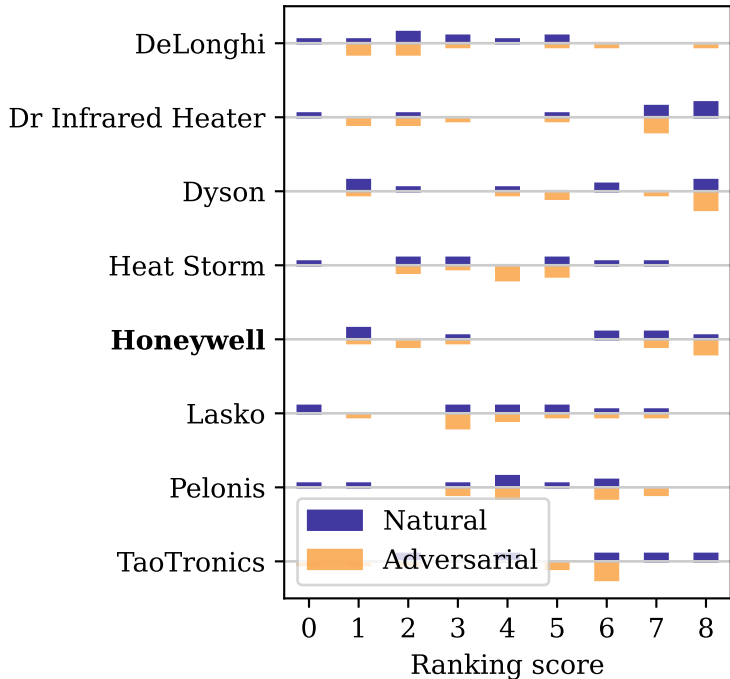

Supplement: software [file 2024.emnlp-main.534.software.zip]

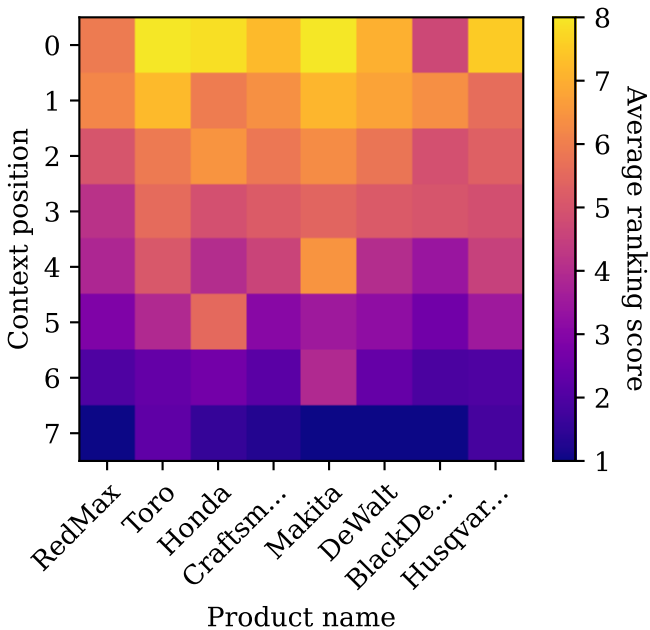

Supplement: software [file 2024.emnlp-main.534.software.zip]

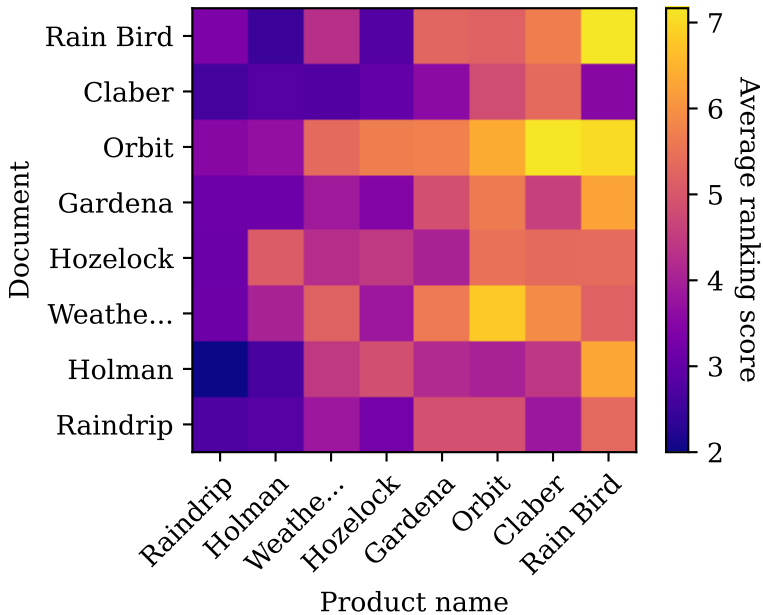

Supplement: software [file 2024.emnlp-main.534.software.zip]

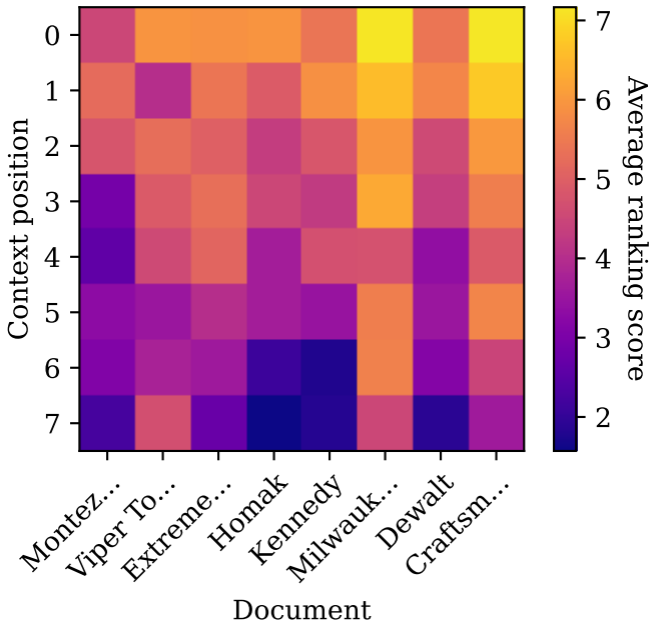

Supplement: software [file 2024.emnlp-main.534.software.zip]

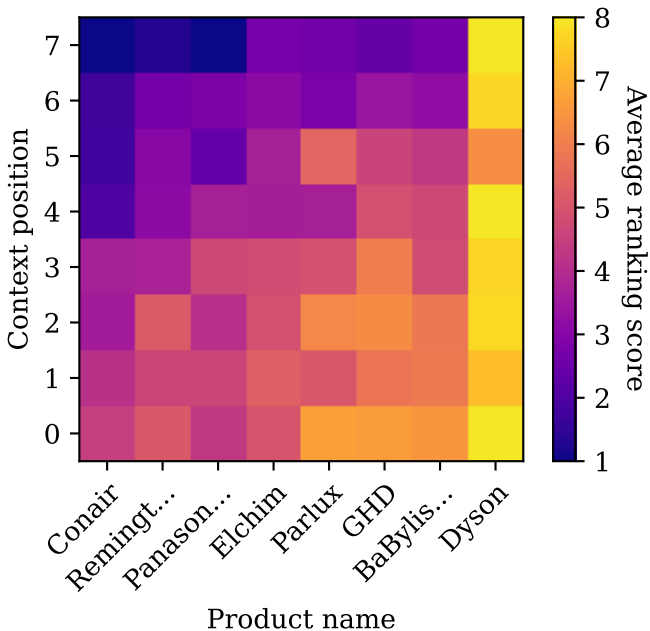

Supplement: software [file 2024.emnlp-main.534.software.zip]

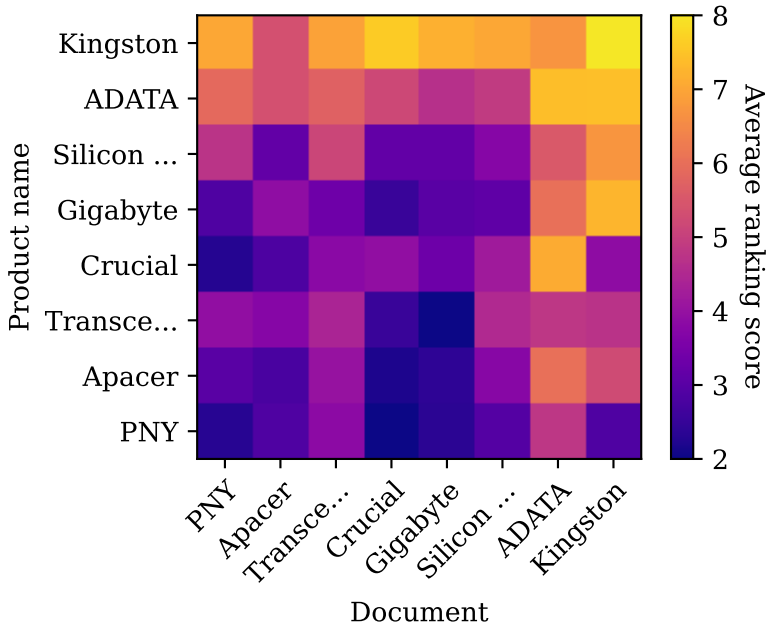

Supplement: software [file 2024.emnlp-main.534.software.zip]

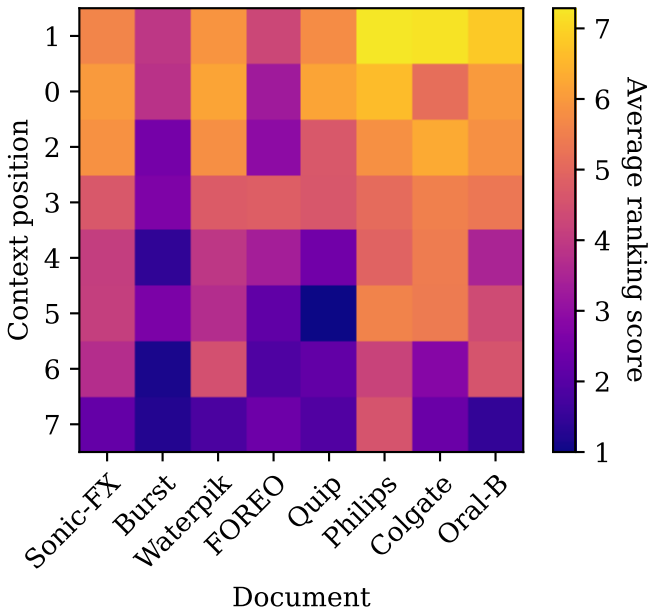

Supplement: software [file 2024.emnlp-main.534.software.zip]

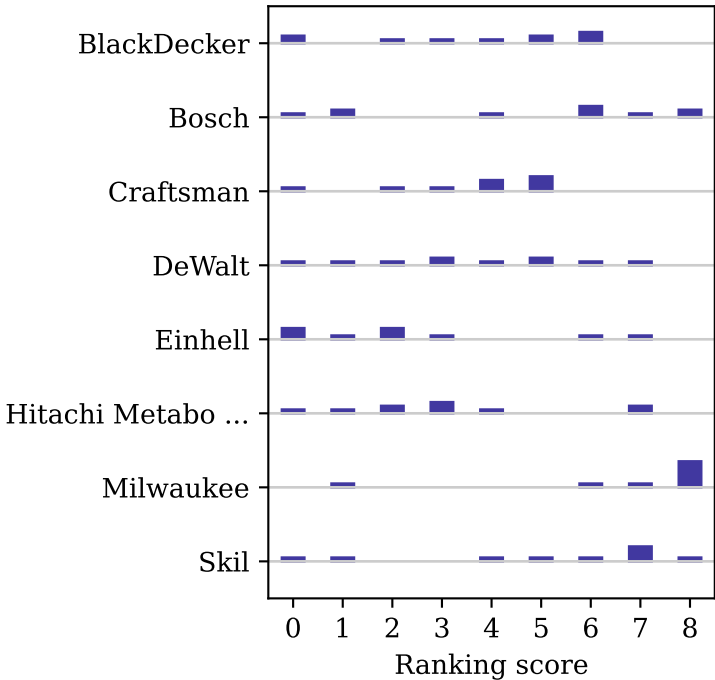

Supplement: software [file 2024.emnlp-main.534.software.zip]

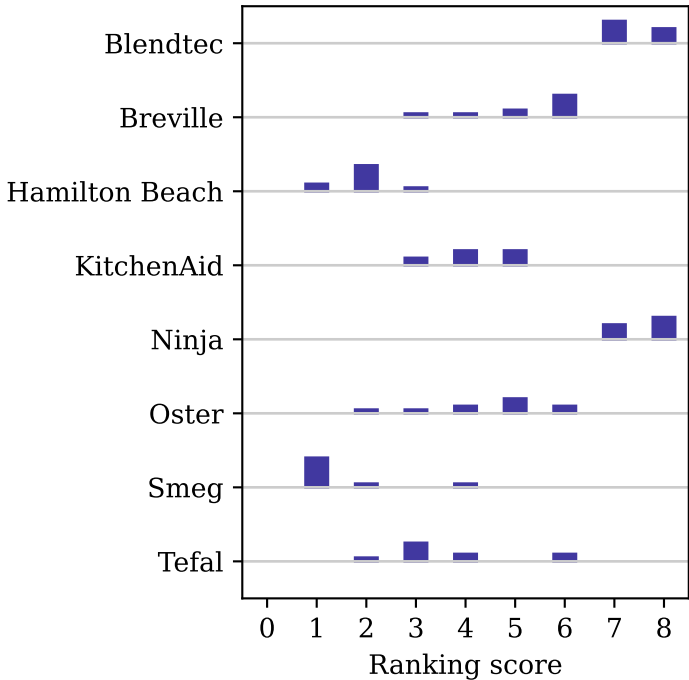

Supplement: software [file 2024.emnlp-main.534.software.zip]

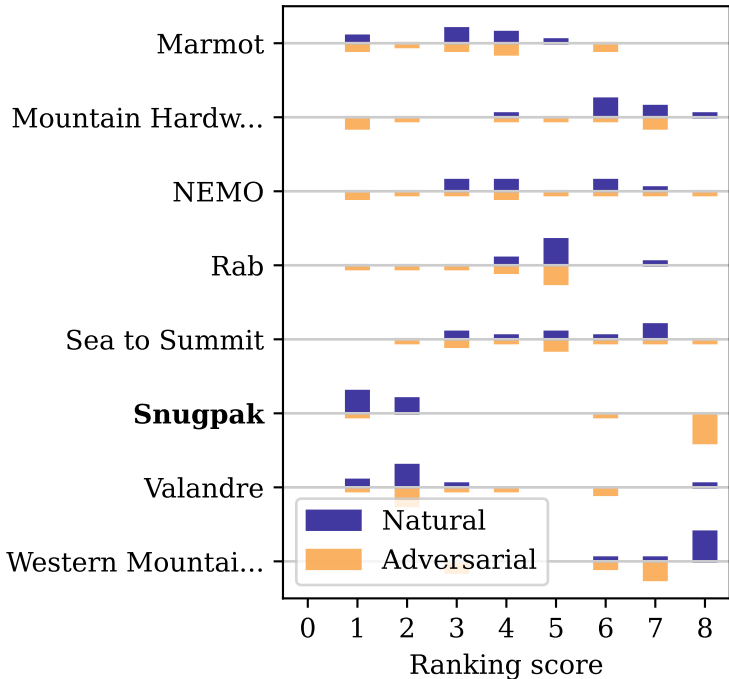

Supplement: software [file 2024.emnlp-main.534.software.zip]

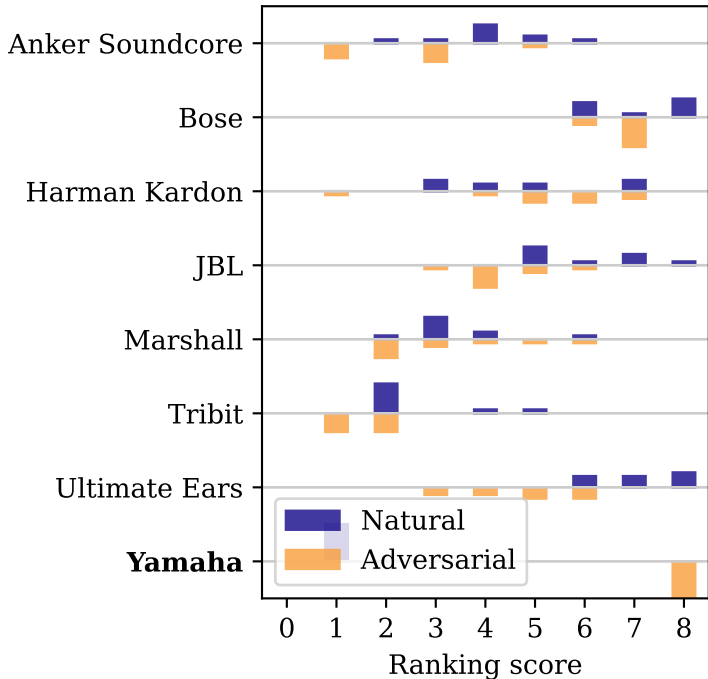

Supplement: software [file 2024.emnlp-main.534.software.zip]

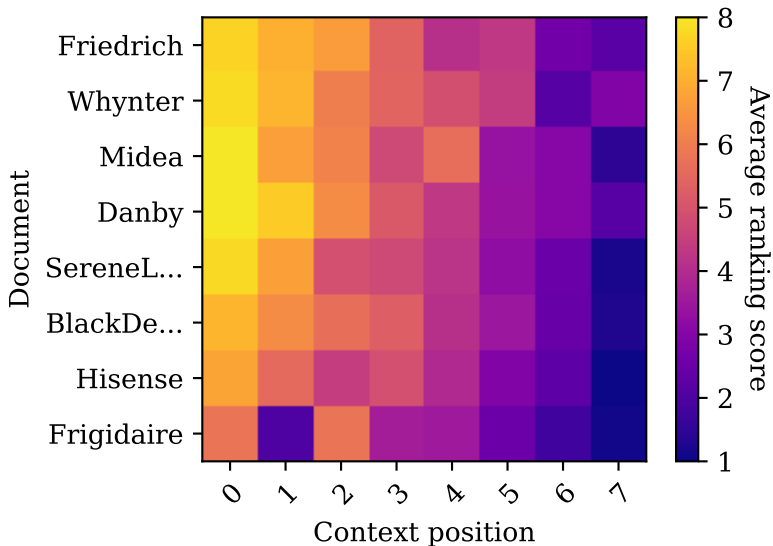

Supplement: software [file 2024.emnlp-main.534.software.zip]

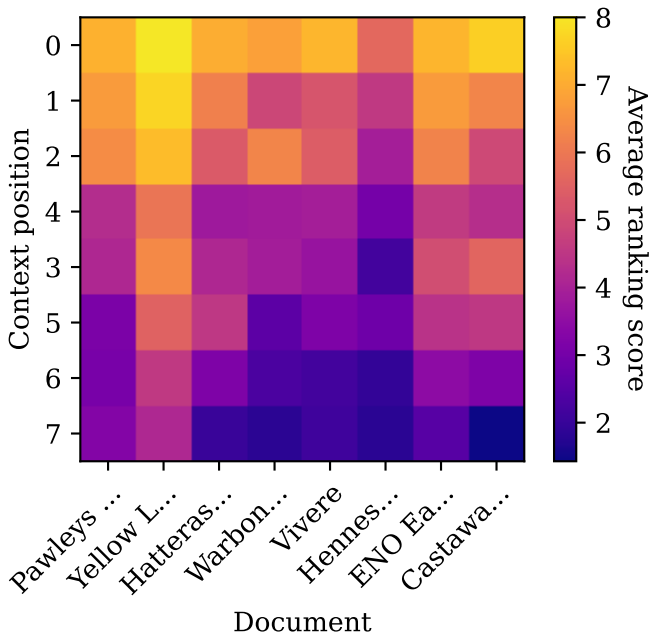

Supplement: software [file 2024.emnlp-main.534.software.zip]

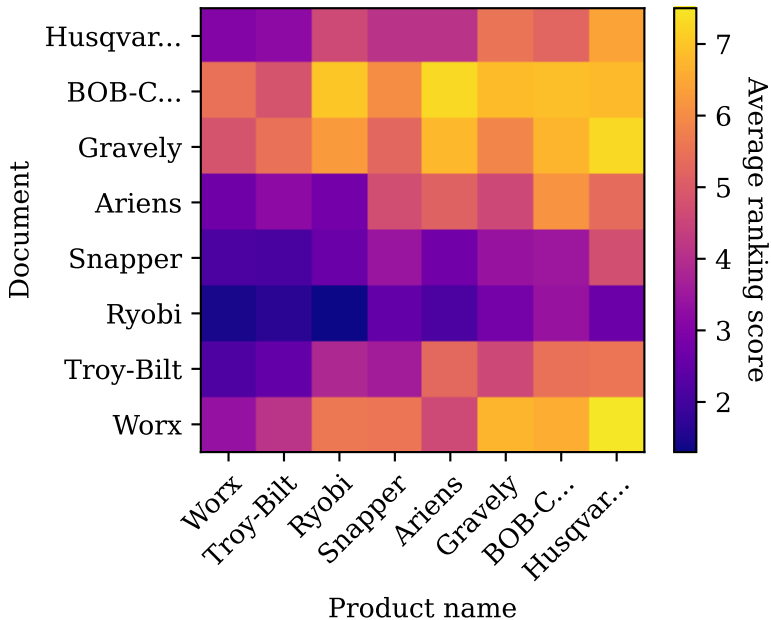

Supplement: software [file 2024.emnlp-main.534.software.zip]

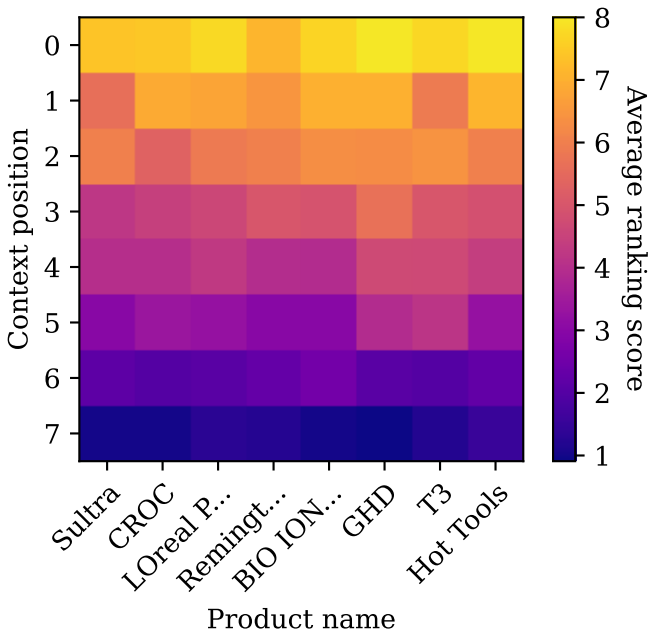

Supplement: software [file 2024.emnlp-main.534.software.zip]

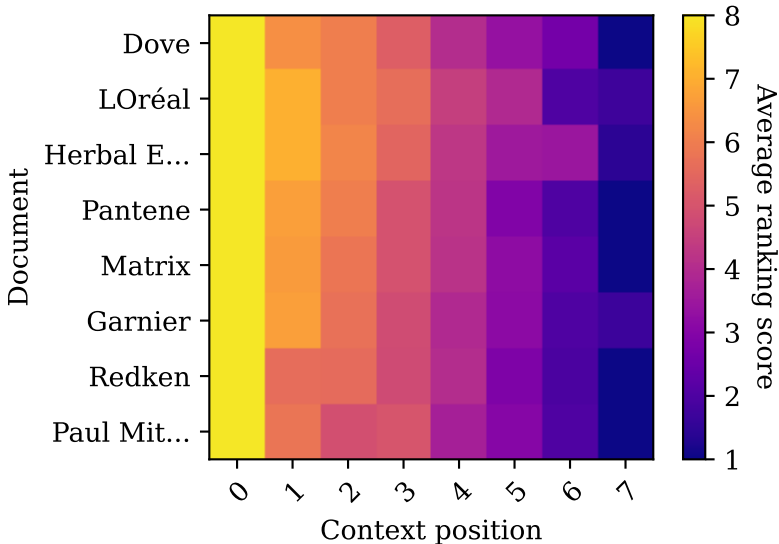

Supplement: software [file 2024.emnlp-main.534.software.zip]

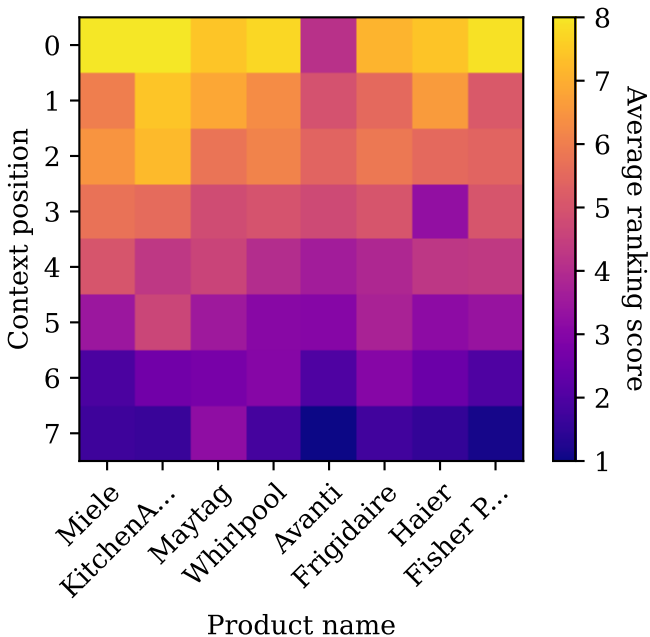

Supplement: software [file 2024.emnlp-main.534.software.zip]

Document

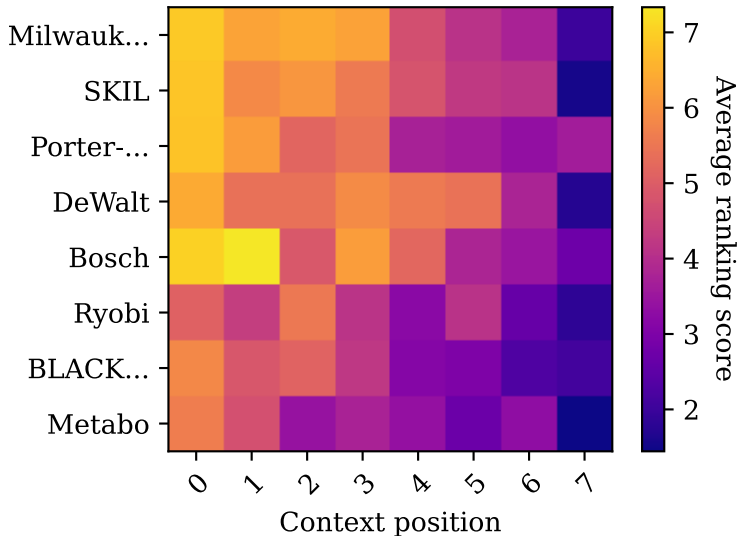

Supplement: software [file 2024.emnlp-main.534.software.zip]

Document

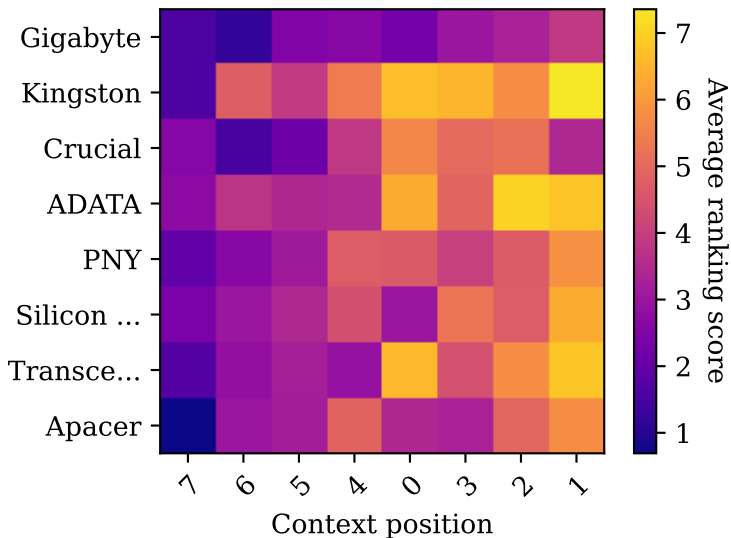

Supplement: software [file 2024.emnlp-main.534.software.zip]

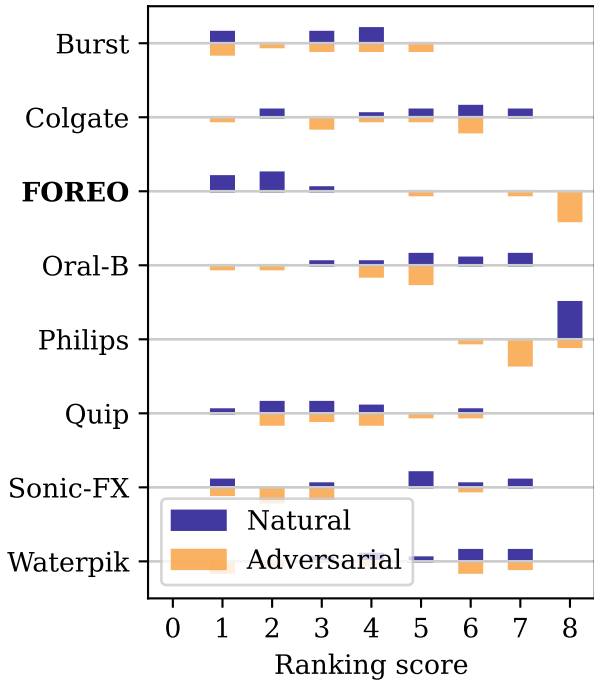

Supplement: software [file 2024.emnlp-main.534.software.zip]

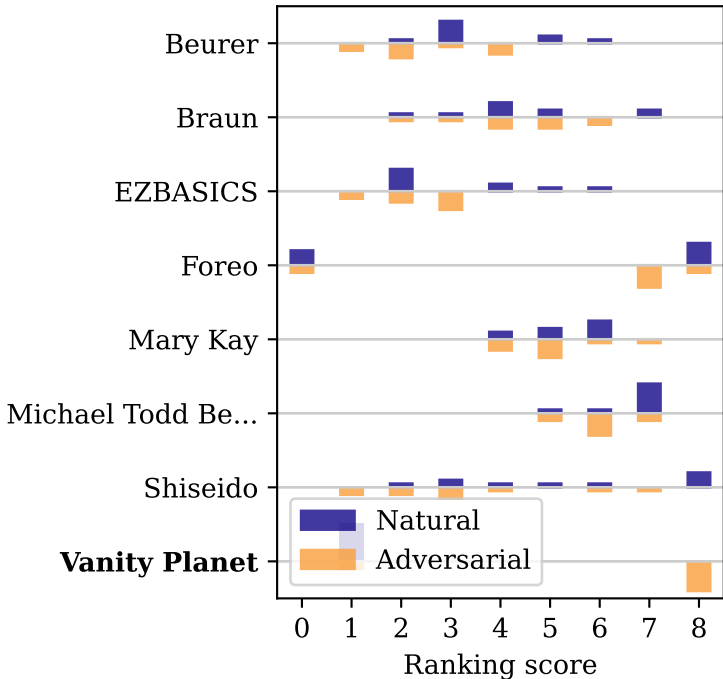

Supplement: software [file 2024.emnlp-main.534.software.zip]

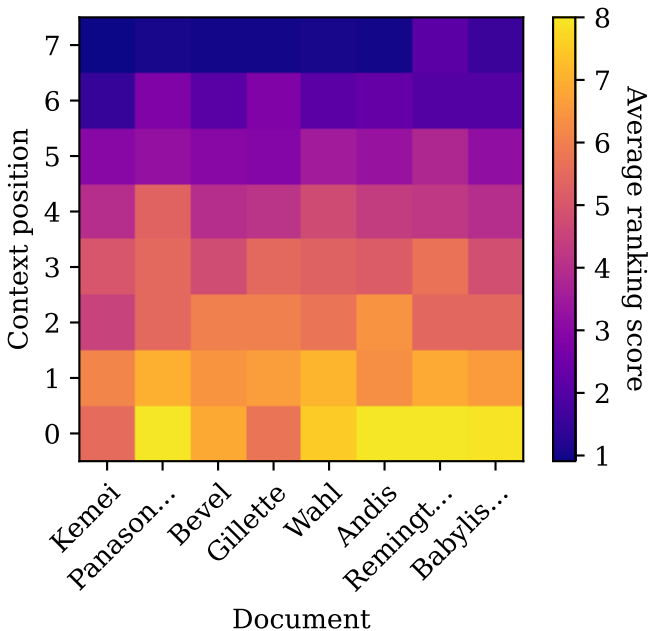

Supplement: software [file 2024.emnlp-main.534.software.zip]

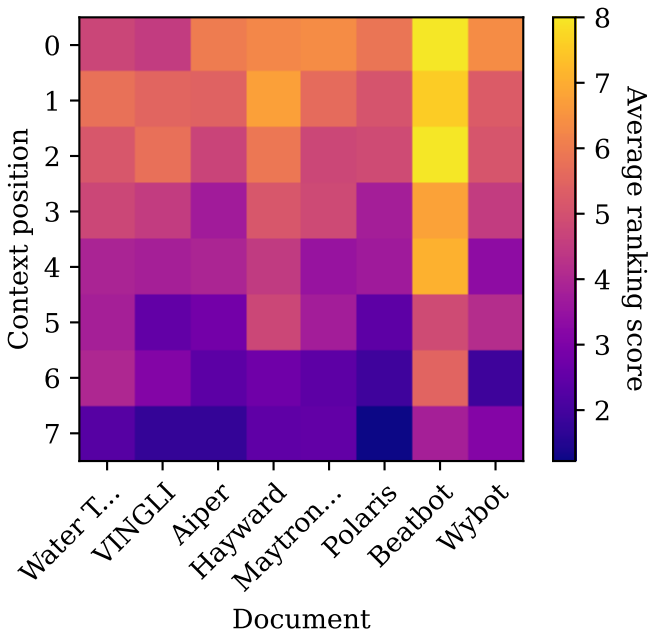

Supplement: software [file 2024.emnlp-main.534.software.zip]

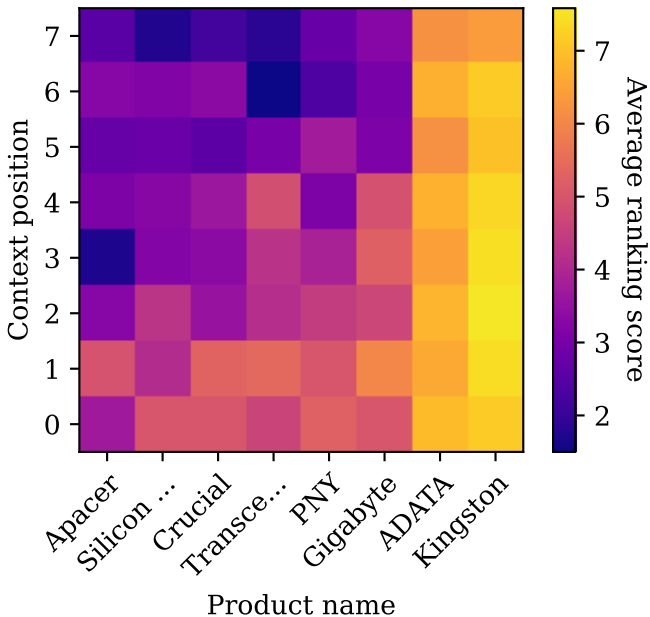

Supplement: software [file 2024.emnlp-main.534.software.zip]

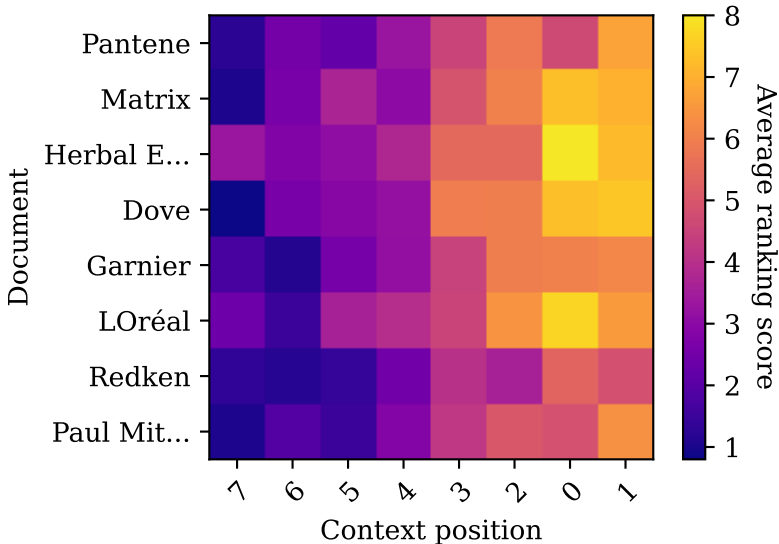

Supplement: software [file 2024.emnlp-main.534.software.zip]

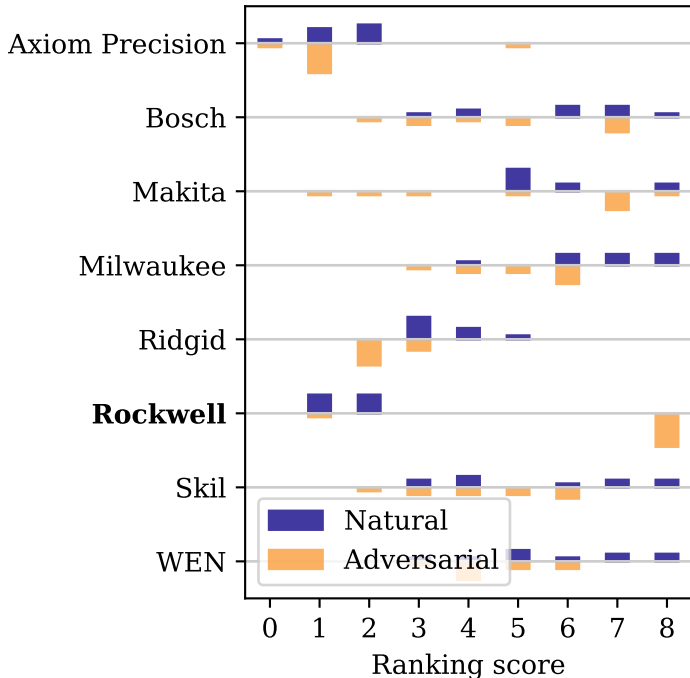

Supplement: software [file 2024.emnlp-main.534.software.zip]

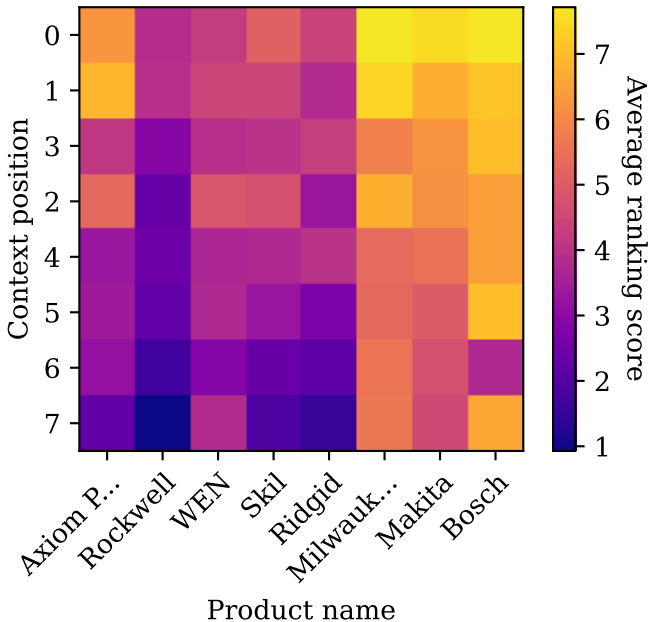

Supplement: software [file 2024.emnlp-main.534.software.zip]

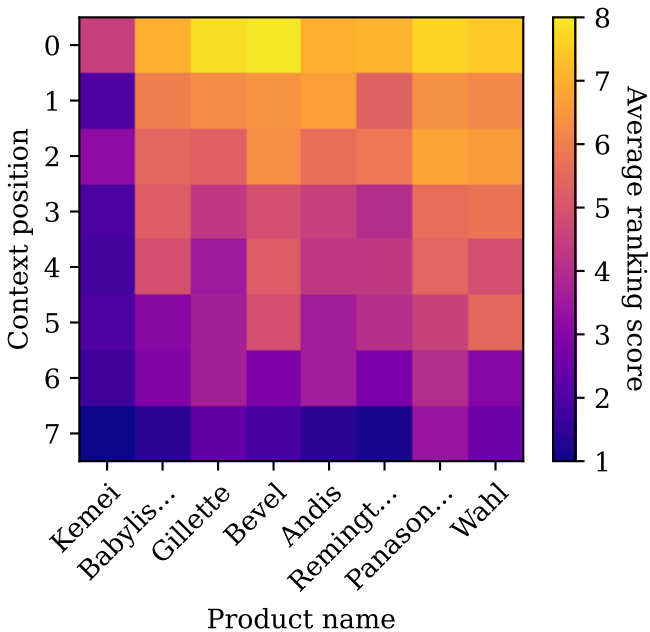

Supplement: software [file 2024.emnlp-main.534.software.zip]

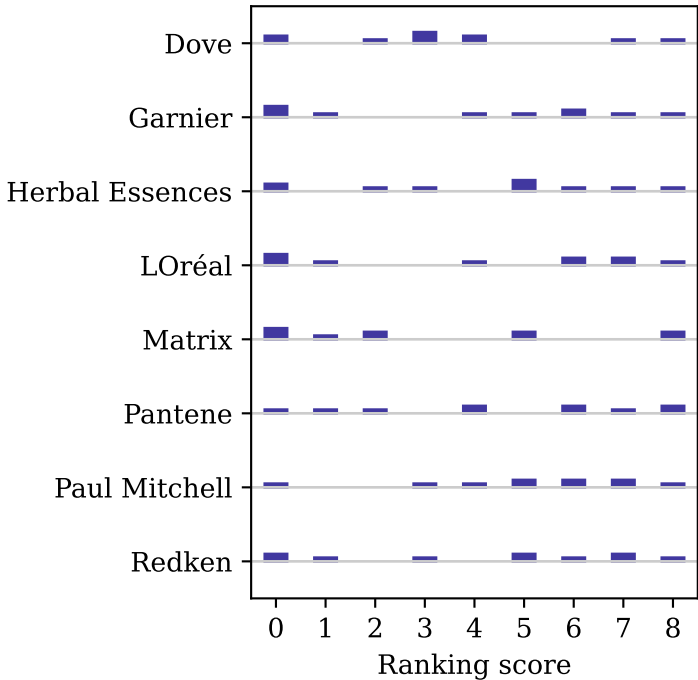

Supplement: software [file 2024.emnlp-main.534.software.zip]

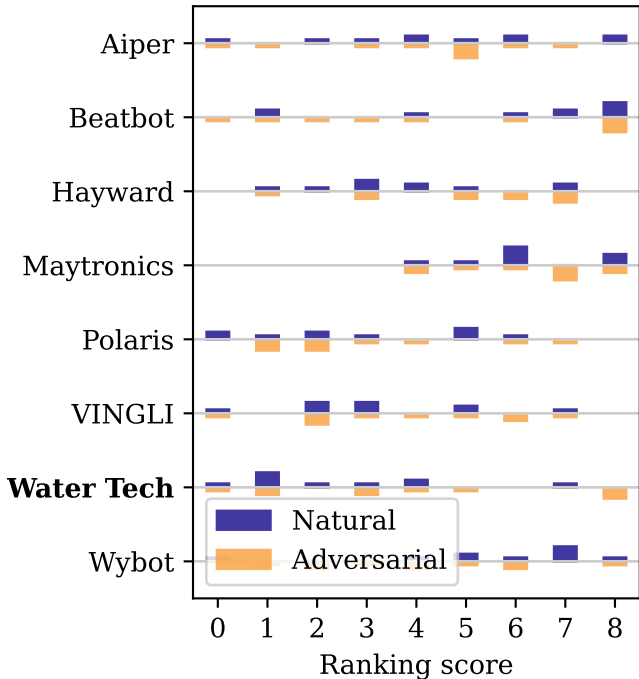

Supplement: software [file 2024.emnlp-main.534.software.zip]

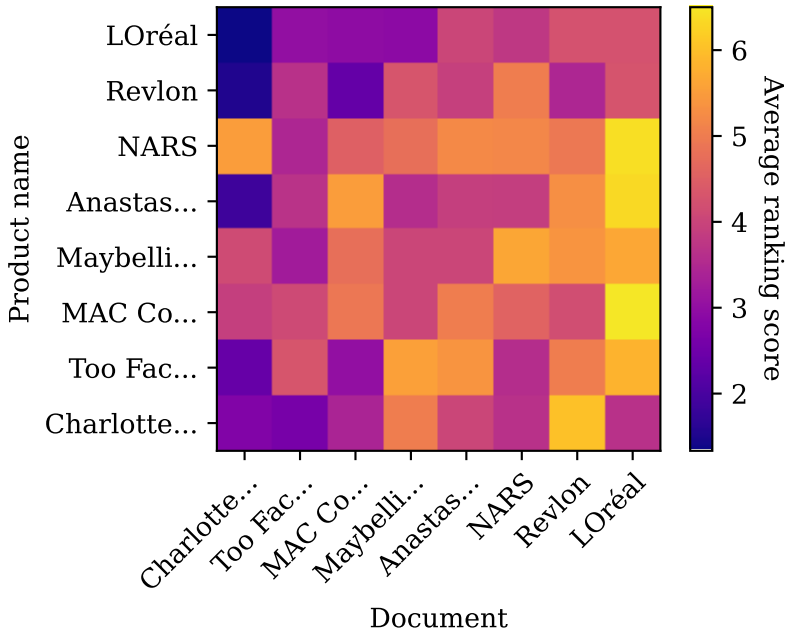

Supplement: software [file 2024.emnlp-main.534.software.zip]

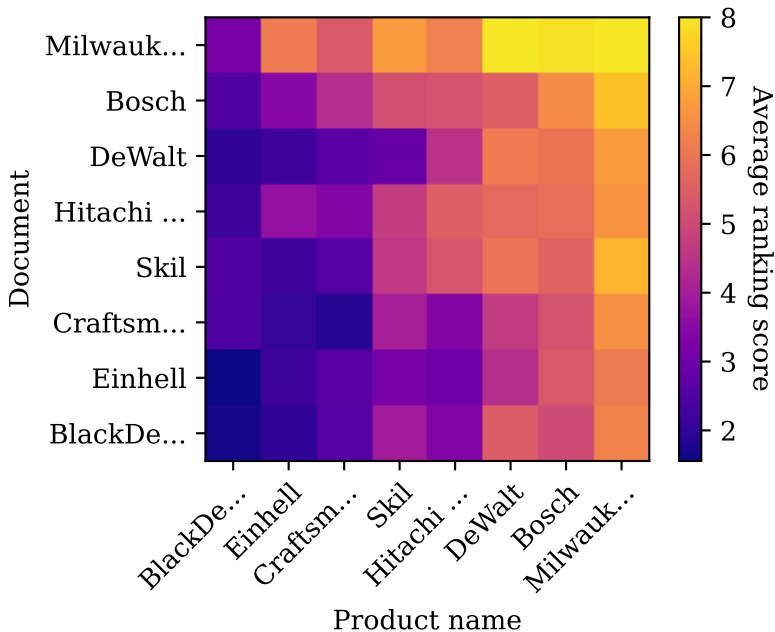

Supplement: software [file 2024.emnlp-main.534.software.zip]

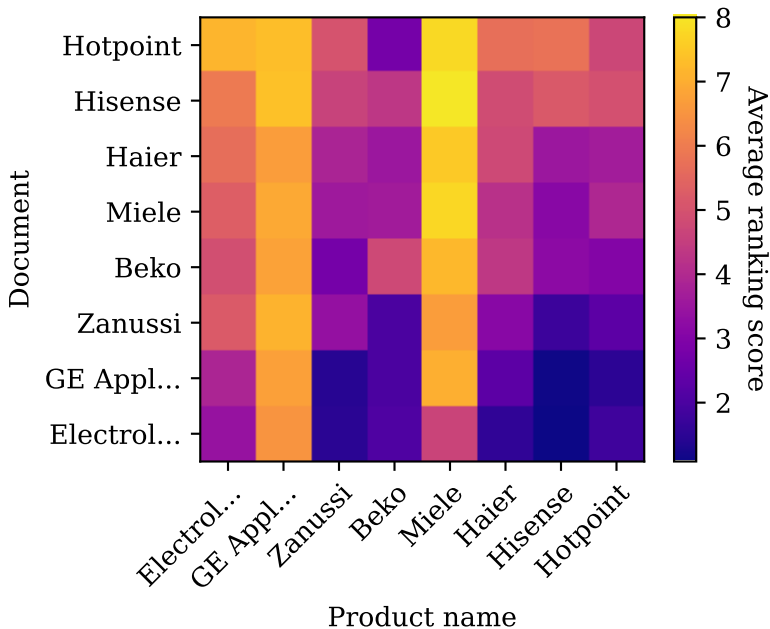

Supplement: software [file 2024.emnlp-main.534.software.zip]

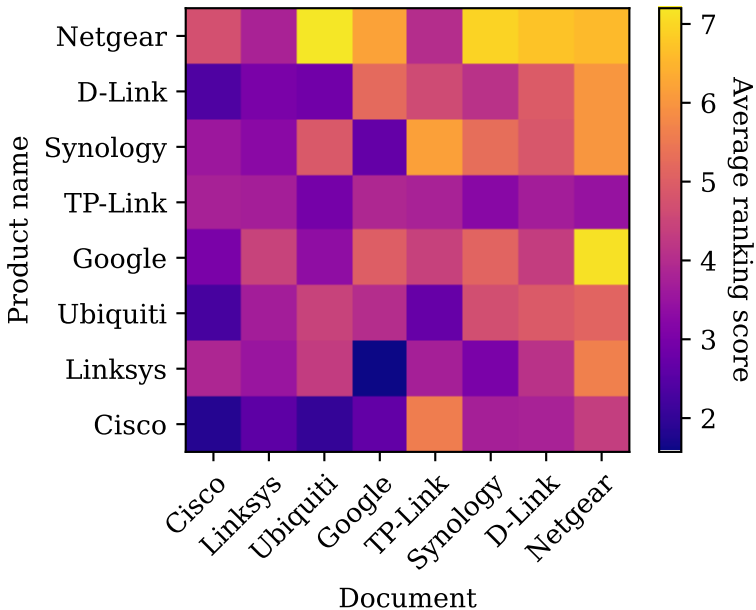

Supplement: software [file 2024.emnlp-main.534.software.zip]

Product name

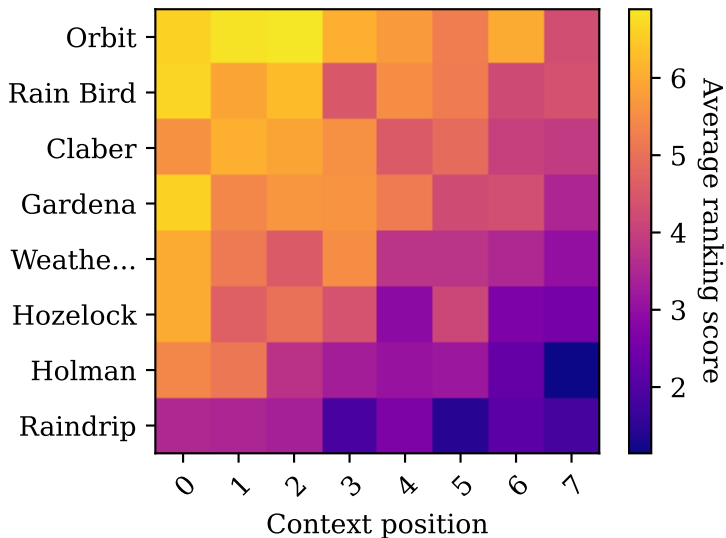

Supplement: software [file 2024.emnlp-main.534.software.zip]

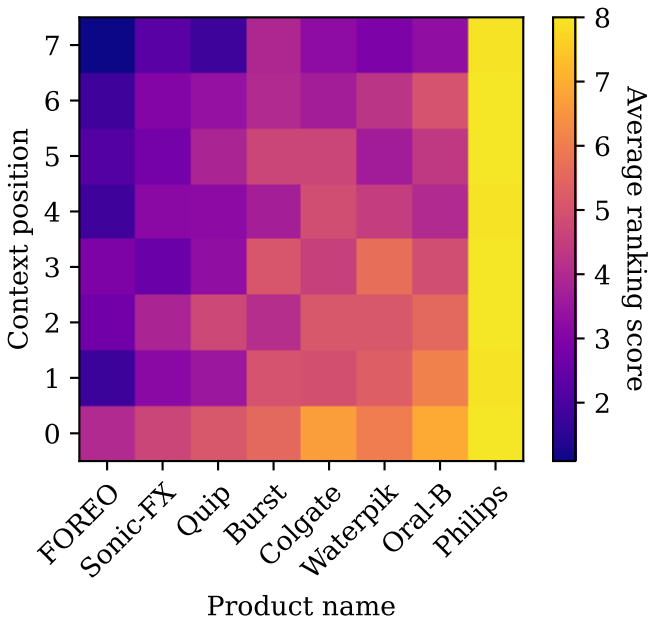

Supplement: software [file 2024.emnlp-main.534.software.zip]

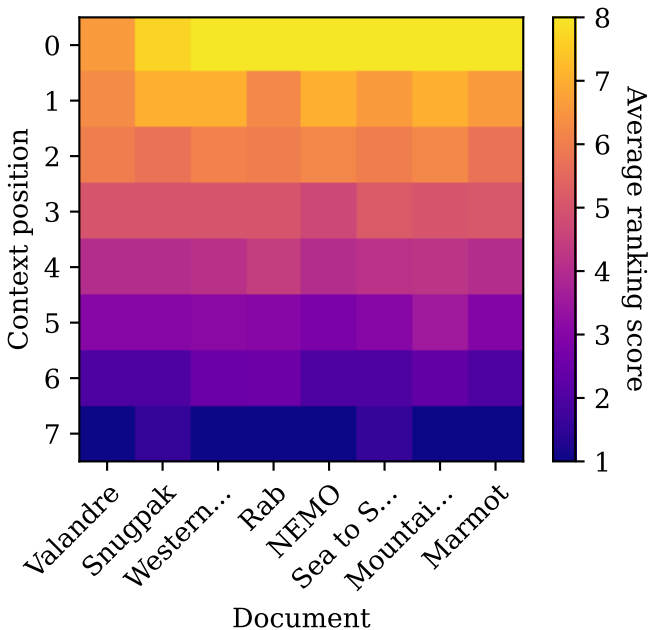

Supplement: software [file 2024.emnlp-main.534.software.zip]

Product name

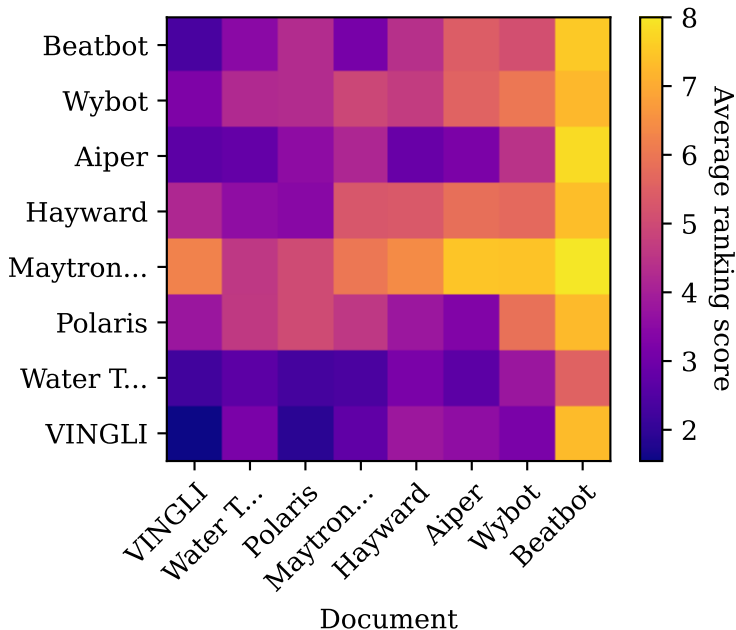

Supplement: software [file 2024.emnlp-main.534.software.zip]

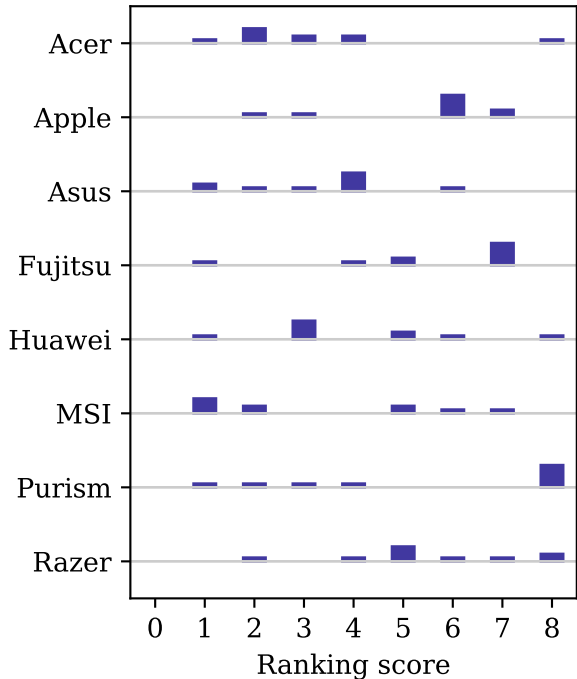

Supplement: software [file 2024.emnlp-main.534.software.zip]

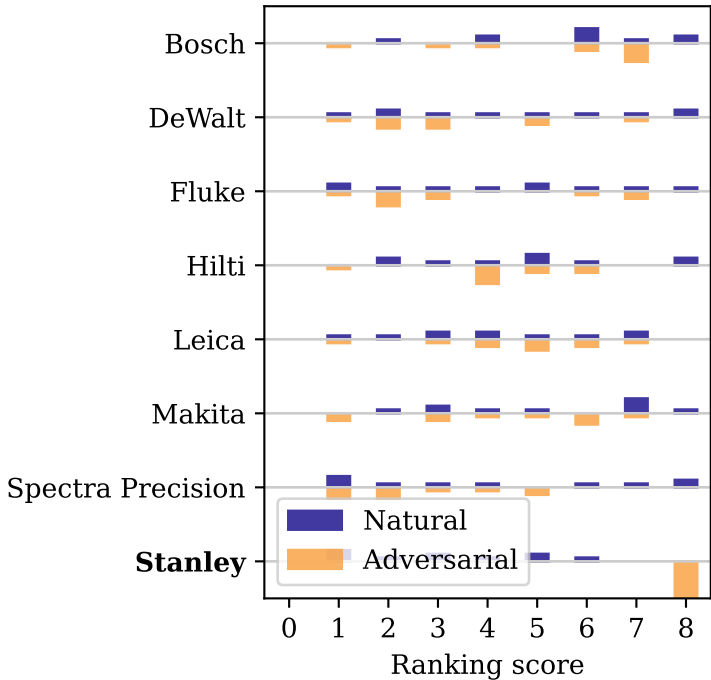

Supplement: software [file 2024.emnlp-main.534.software.zip]

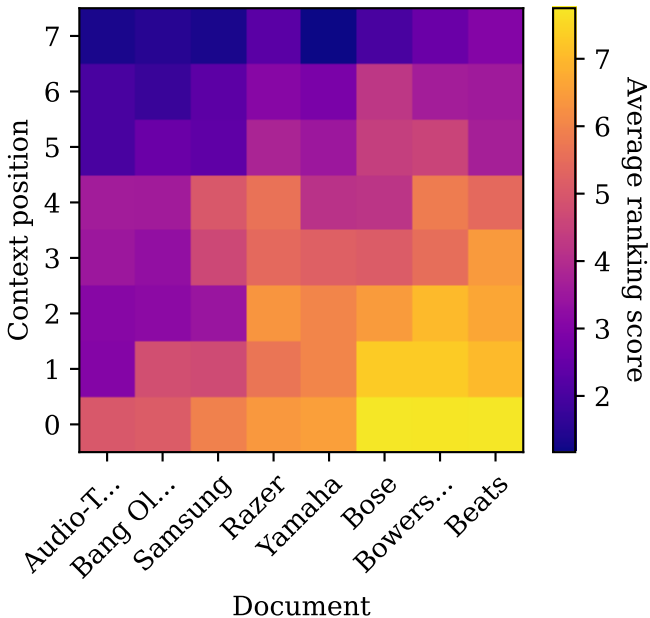

Supplement: software [file 2024.emnlp-main.534.software.zip]

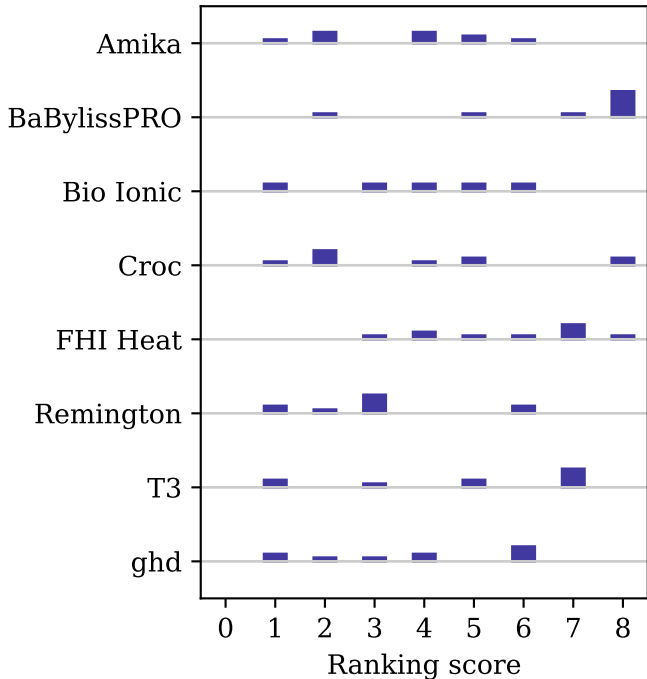

Supplement: software [file 2024.emnlp-main.534.software.zip]

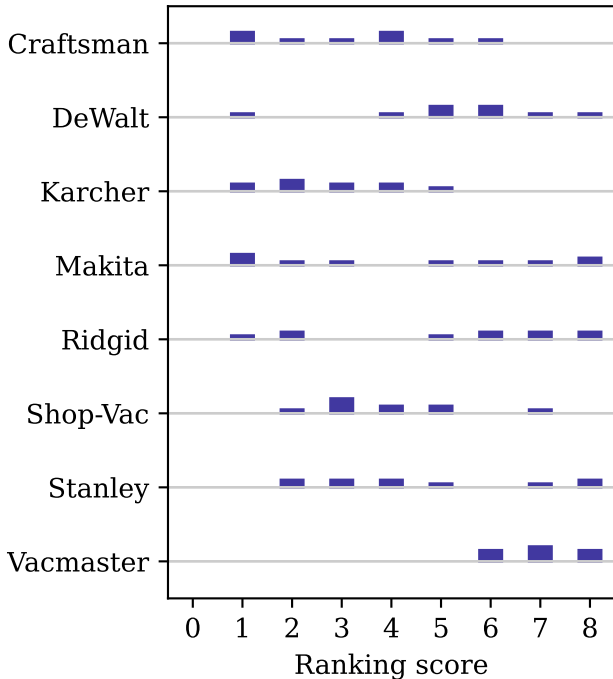

Supplement: software [file 2024.emnlp-main.534.software.zip]

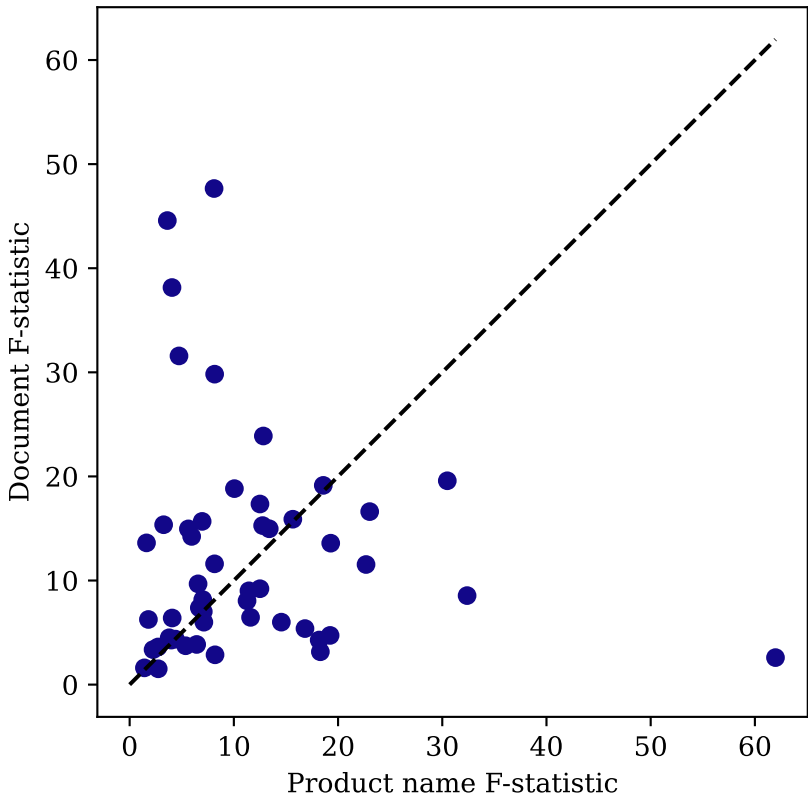

Supplement: software [file 2024.emnlp-main.534.software.zip]

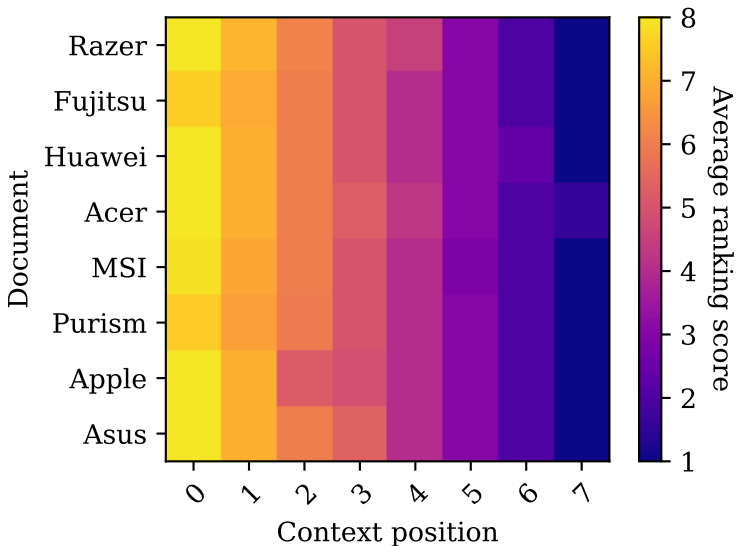

Supplement: software [file 2024.emnlp-main.534.software.zip]

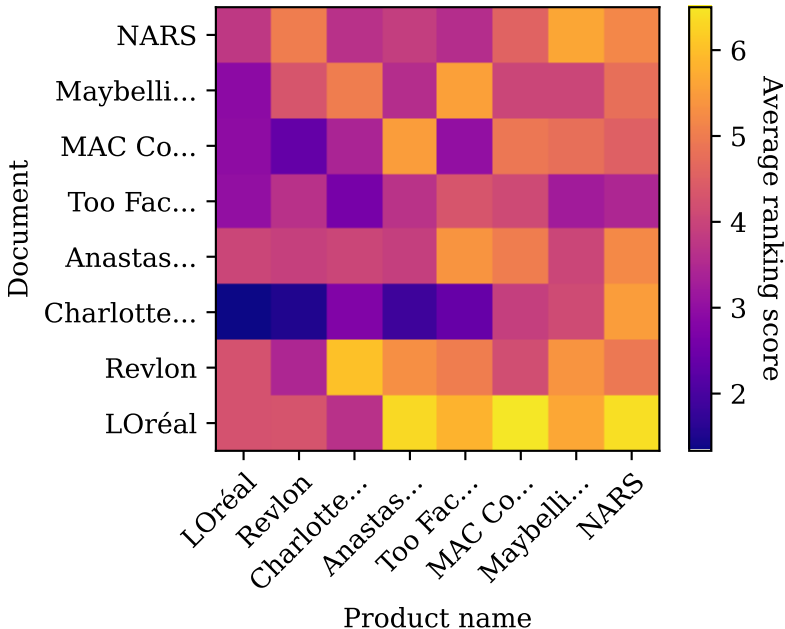

Supplement: software [file 2024.emnlp-main.534.software.zip]

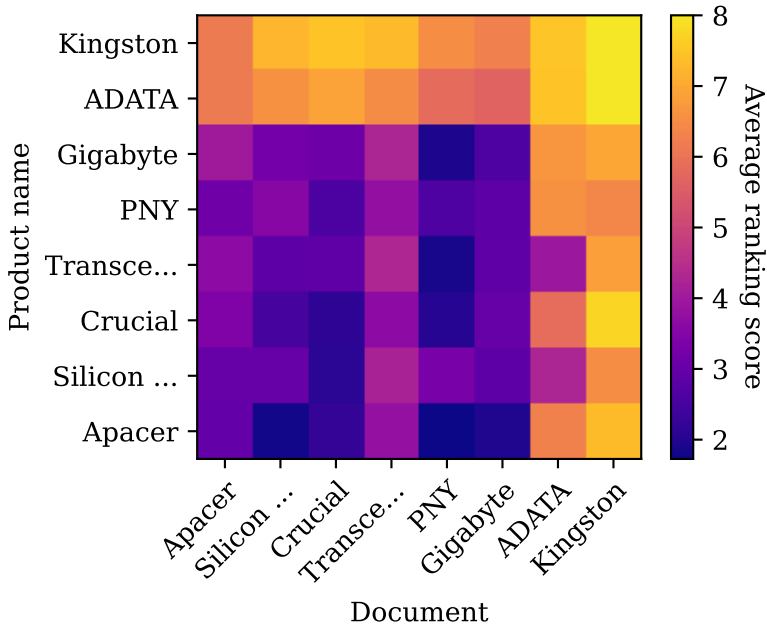

Supplement: software [file 2024.emnlp-main.534.software.zip]

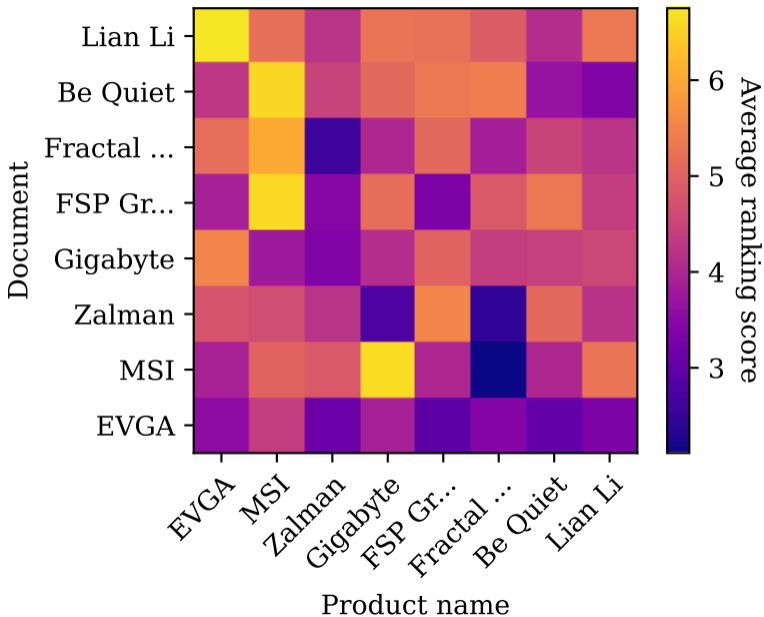

Supplement: software [file 2024.emnlp-main.534.software.zip]

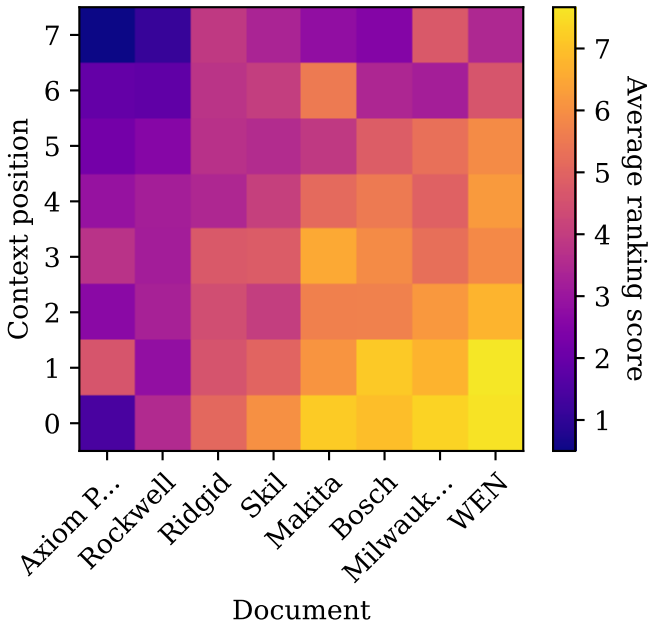

Supplement: software [file 2024.emnlp-main.534.software.zip]

Product name

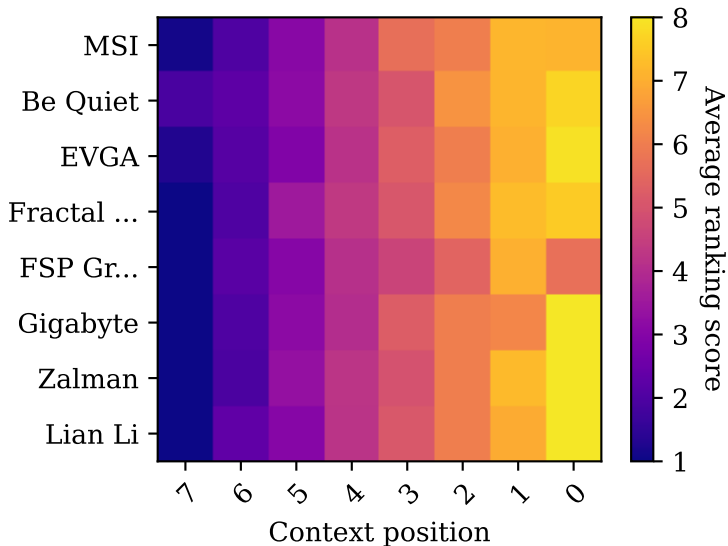

Supplement: software [file 2024.emnlp-main.534.software.zip]

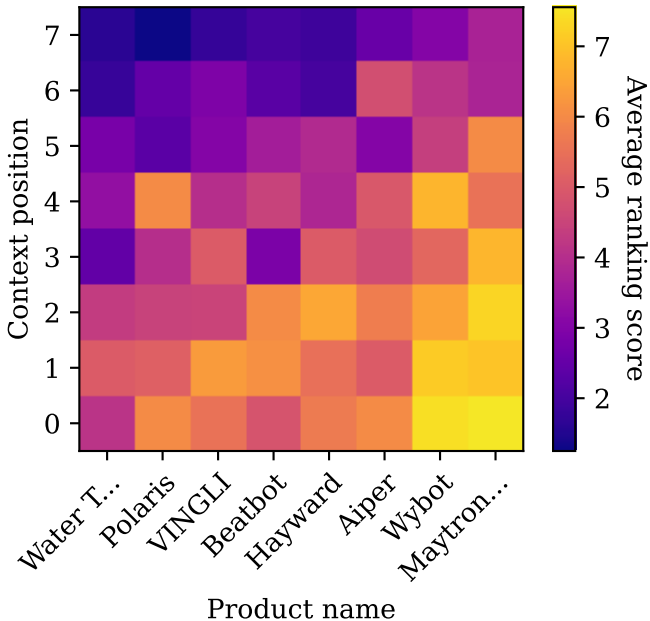

Supplement: software [file 2024.emnlp-main.534.software.zip]

Product name

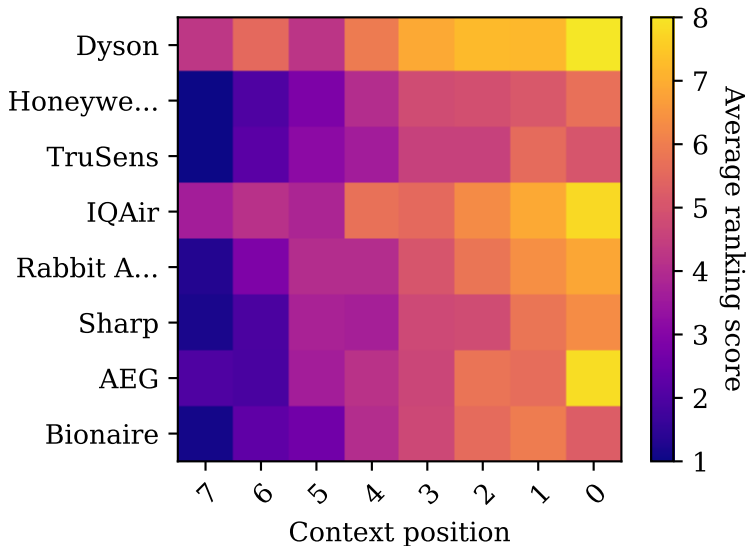

Supplement: software [file 2024.emnlp-main.534.software.zip]

Document

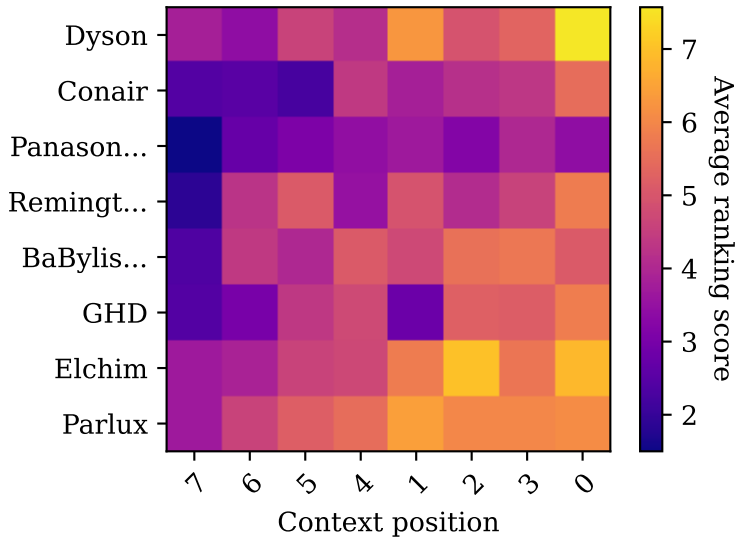

Supplement: software [file 2024.emnlp-main.534.software.zip]

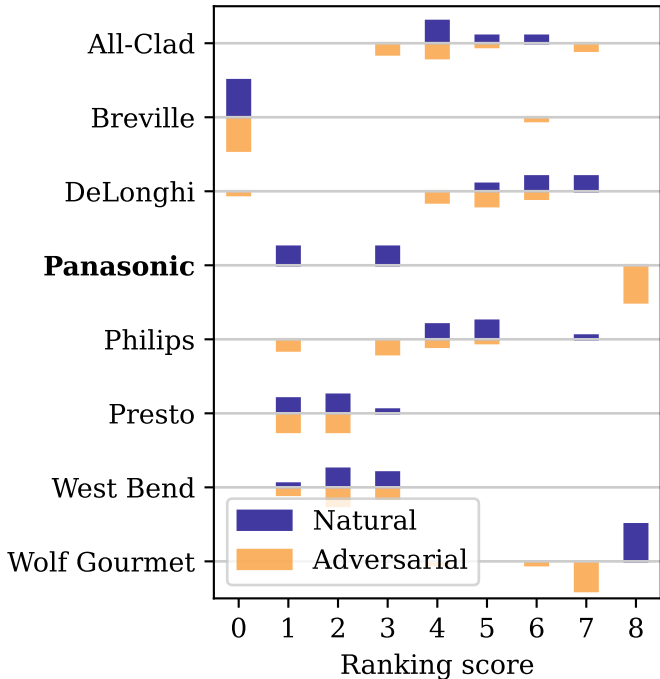

Supplement: software [file 2024.emnlp-main.534.software.zip]

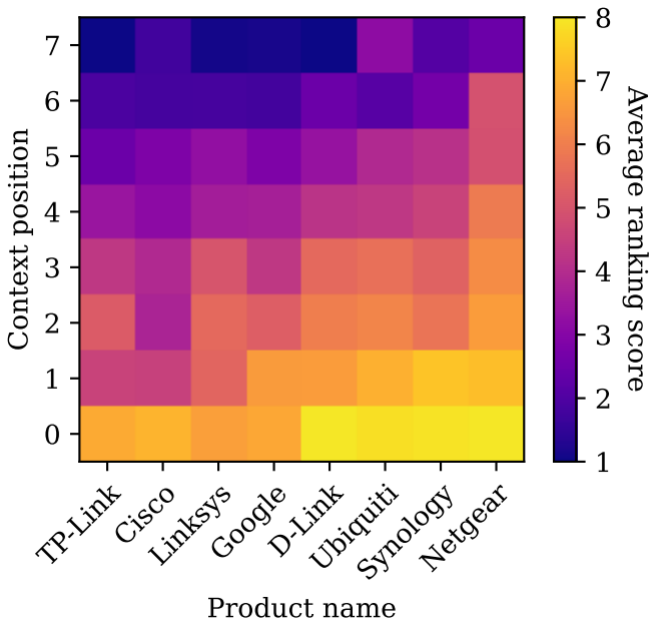

Supplement: software [file 2024.emnlp-main.534.software.zip]

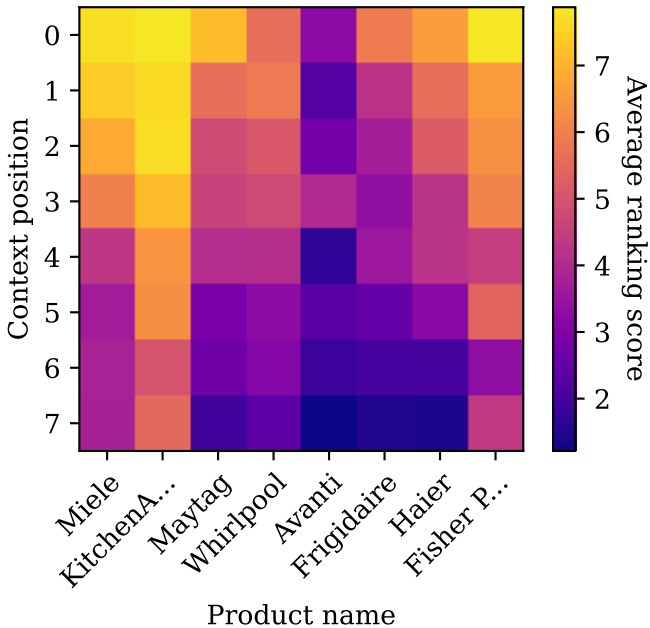

Supplement: software [file 2024.emnlp-main.534.software.zip]

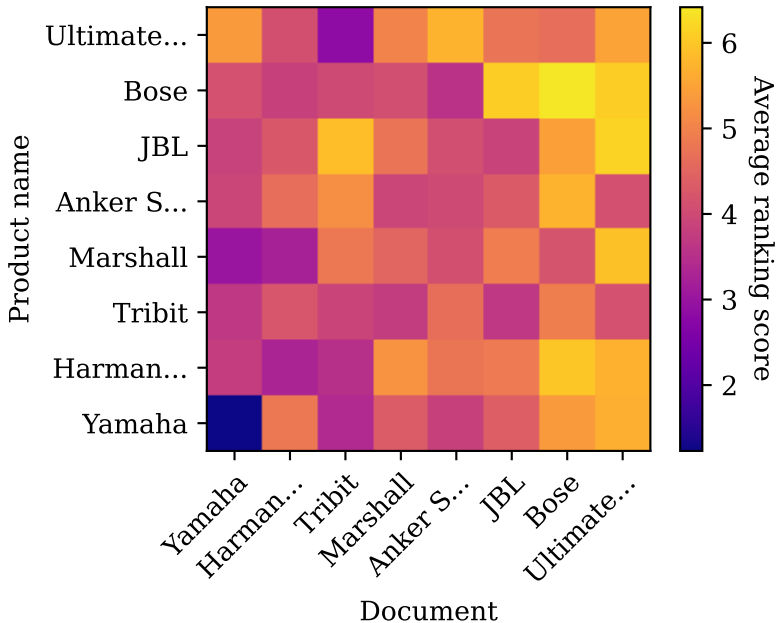

Supplement: software [file 2024.emnlp-main.534.software.zip]

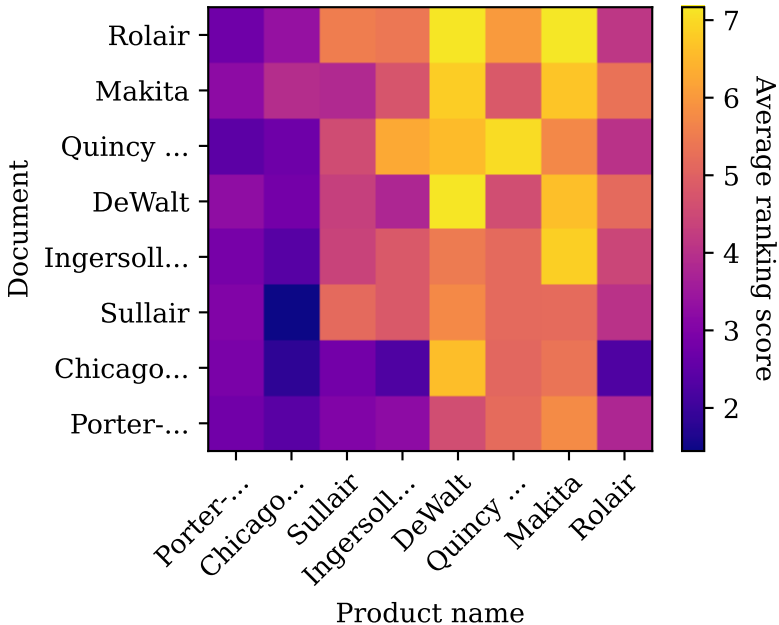

Supplement: software [file 2024.emnlp-main.534.software.zip]

Product name

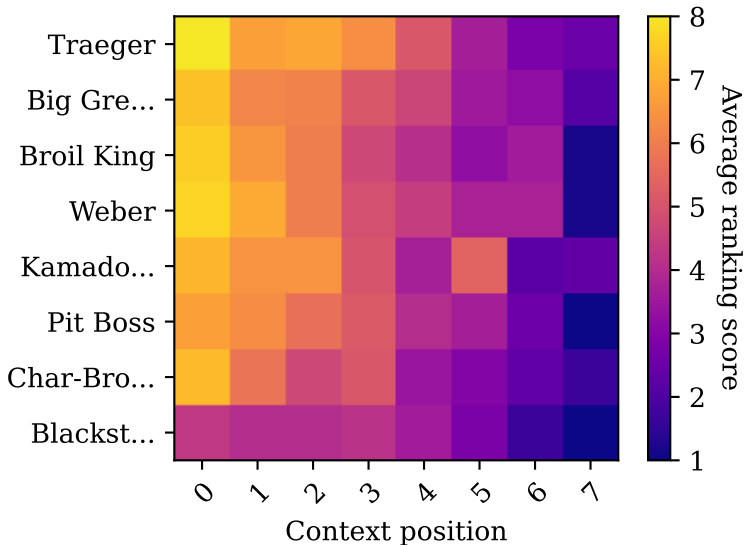

Supplement: software [file 2024.emnlp-main.534.software.zip]

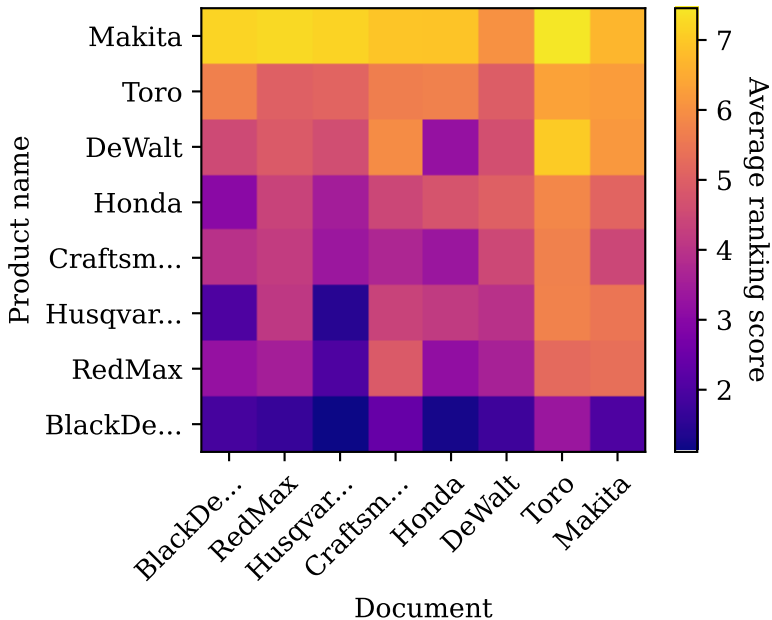

Supplement: software [file 2024.emnlp-main.534.software.zip]

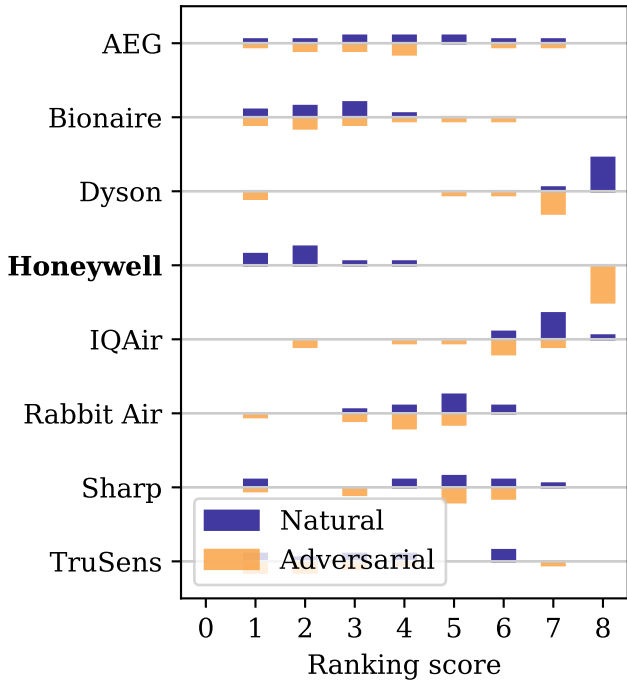

Supplement: software [file 2024.emnlp-main.534.software.zip]

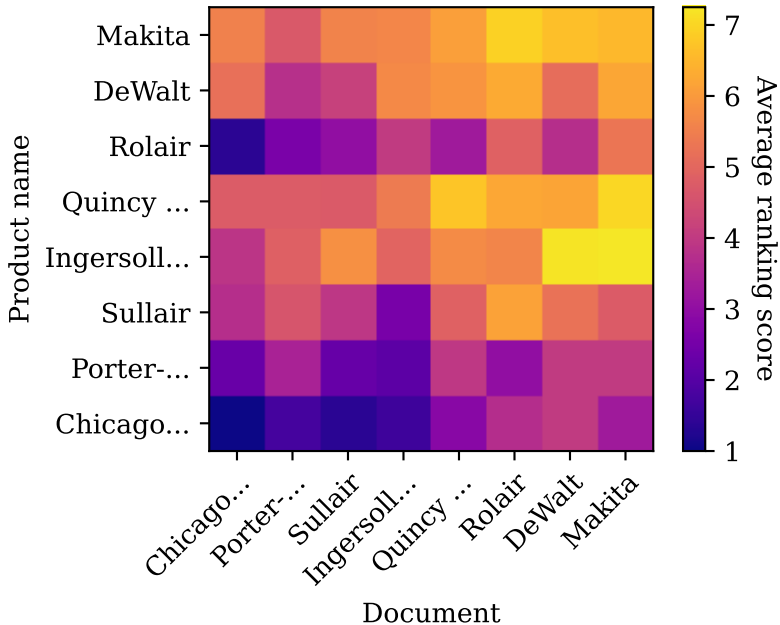

Supplement: software [file 2024.emnlp-main.534.software.zip]

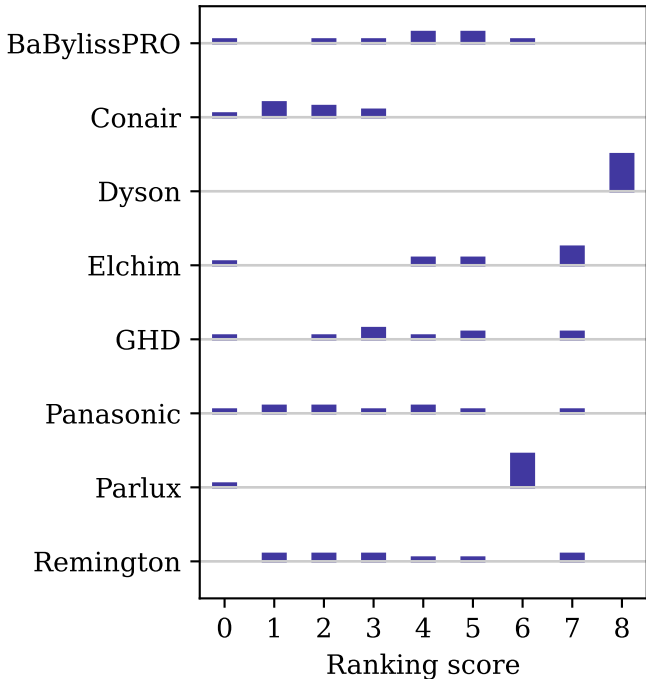

Supplement: software [file 2024.emnlp-main.534.software.zip]

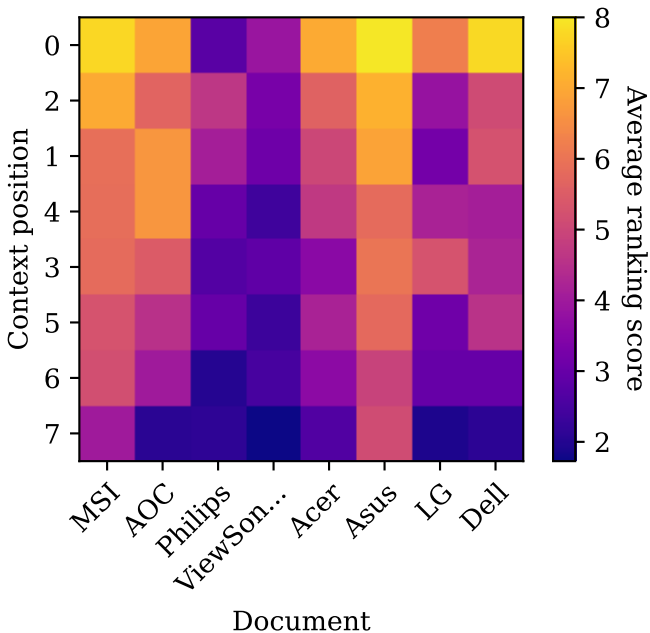

Supplement: software [file 2024.emnlp-main.534.software.zip]

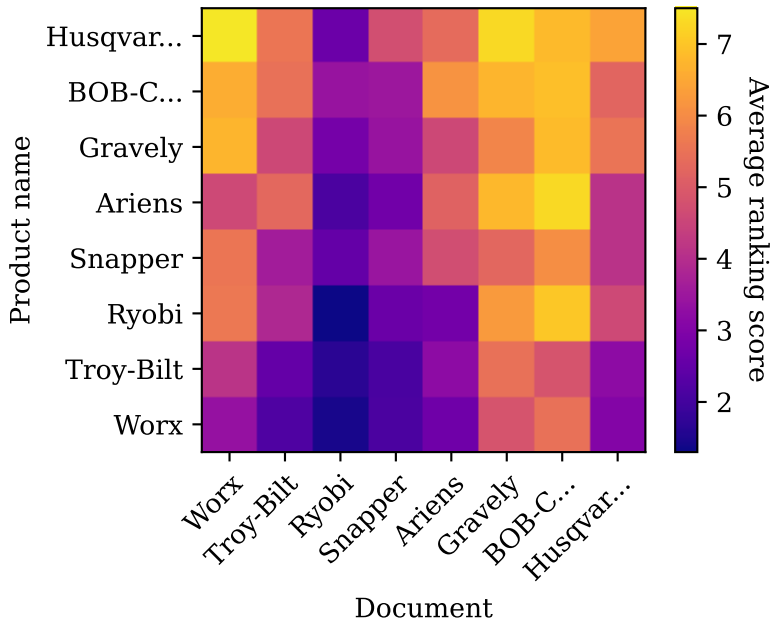

Supplement: software [file 2024.emnlp-main.534.software.zip]

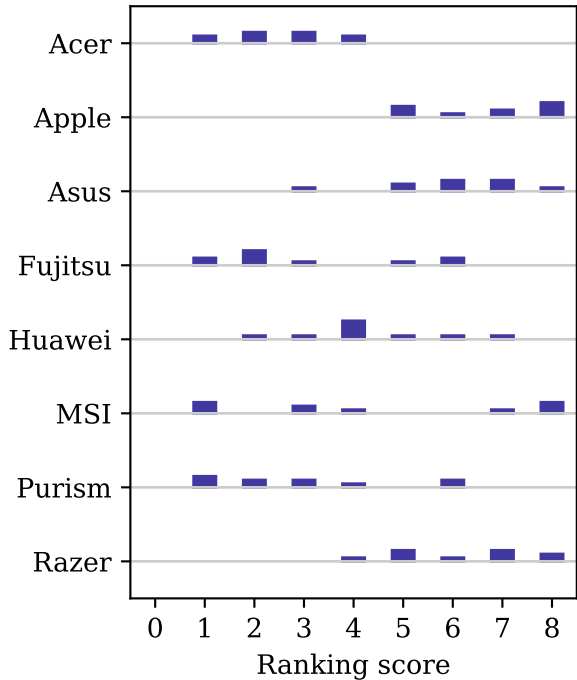

Supplement: software [file 2024.emnlp-main.534.software.zip]

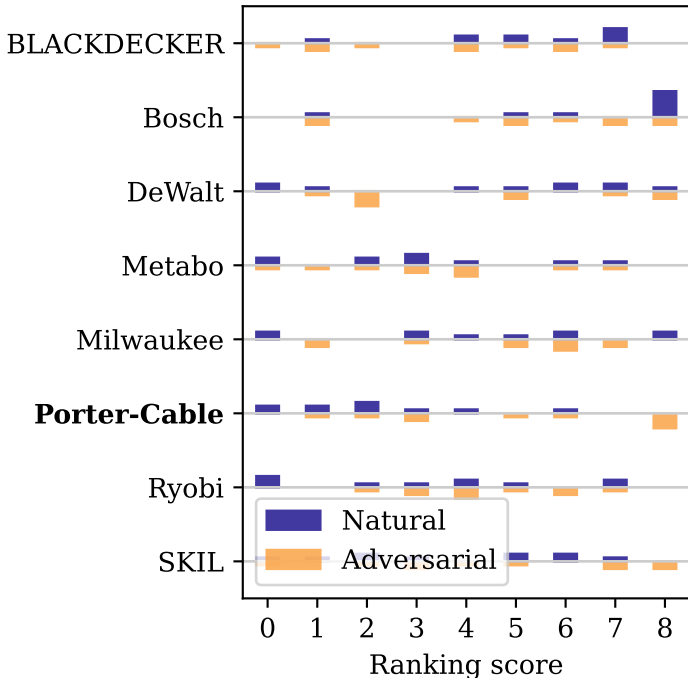

Supplement: software [file 2024.emnlp-main.534.software.zip]

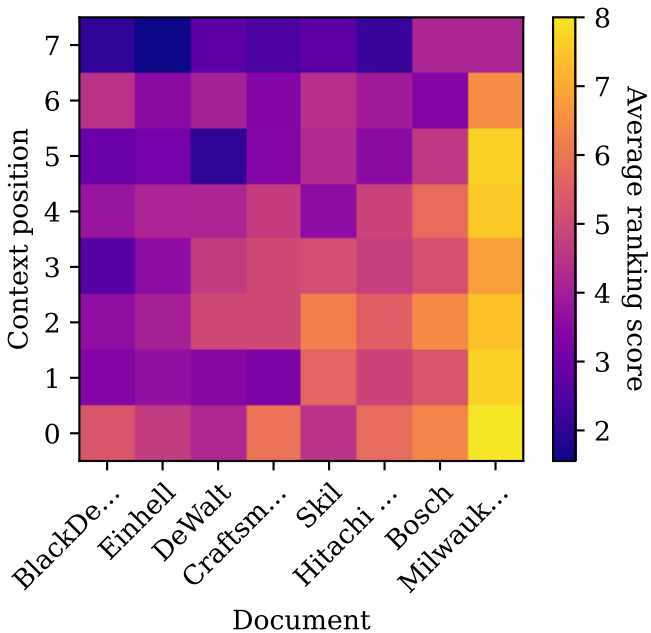

Supplement: software [file 2024.emnlp-main.534.software.zip]

Product name

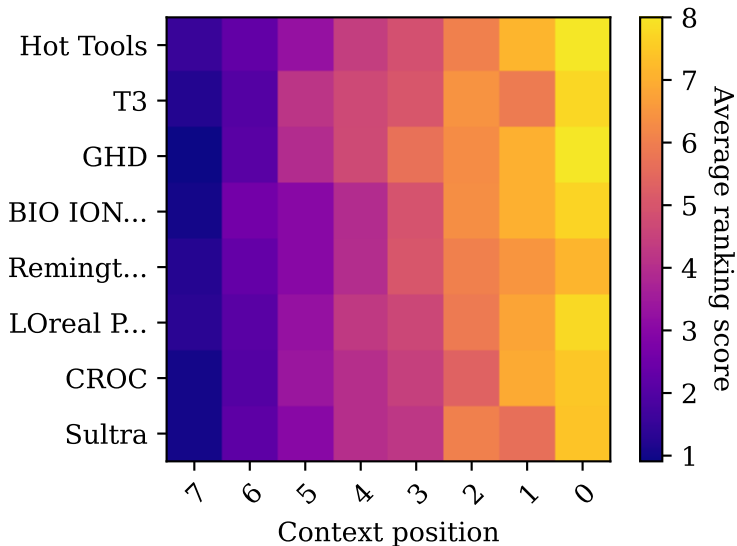

Supplement: software [file 2024.emnlp-main.534.software.zip]

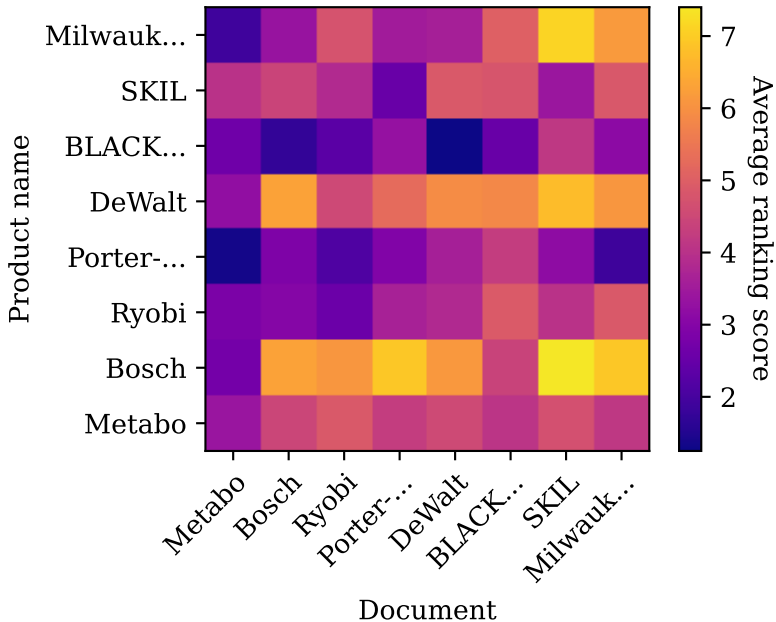

Supplement: software [file 2024.emnlp-main.534.software.zip]

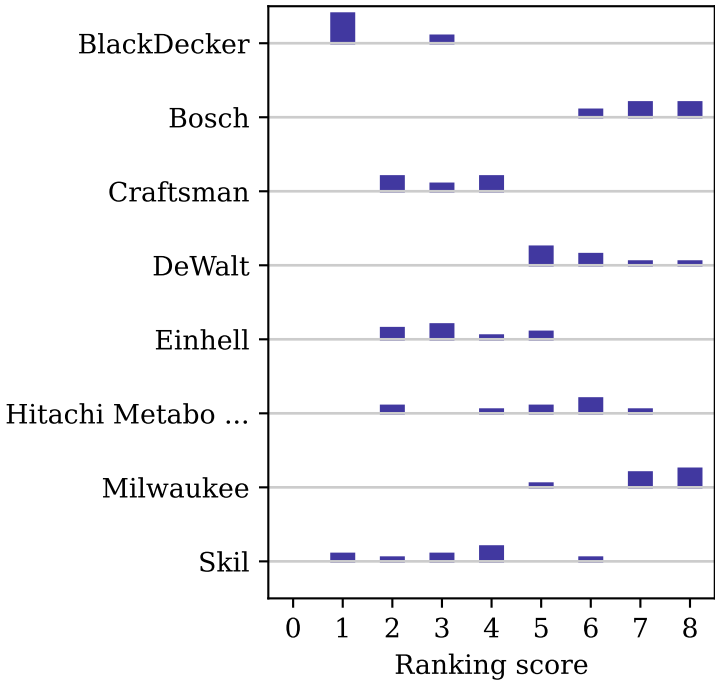

Supplement: software [file 2024.emnlp-main.534.software.zip]

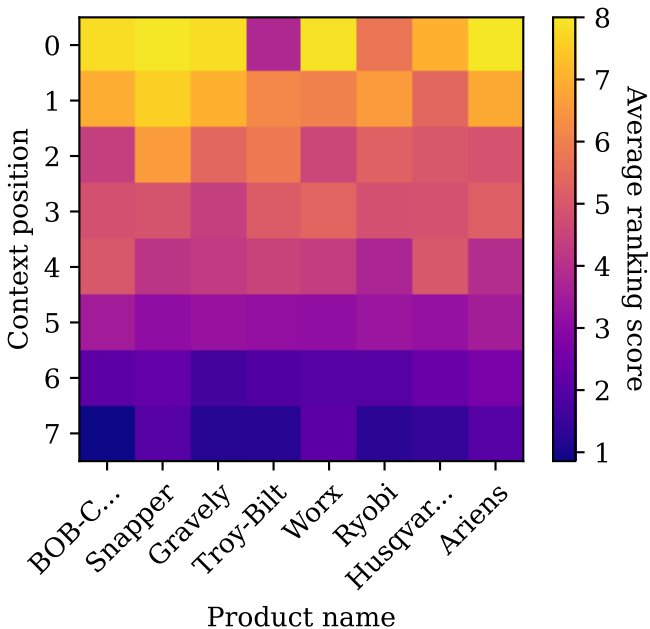

Supplement: software [file 2024.emnlp-main.534.software.zip]

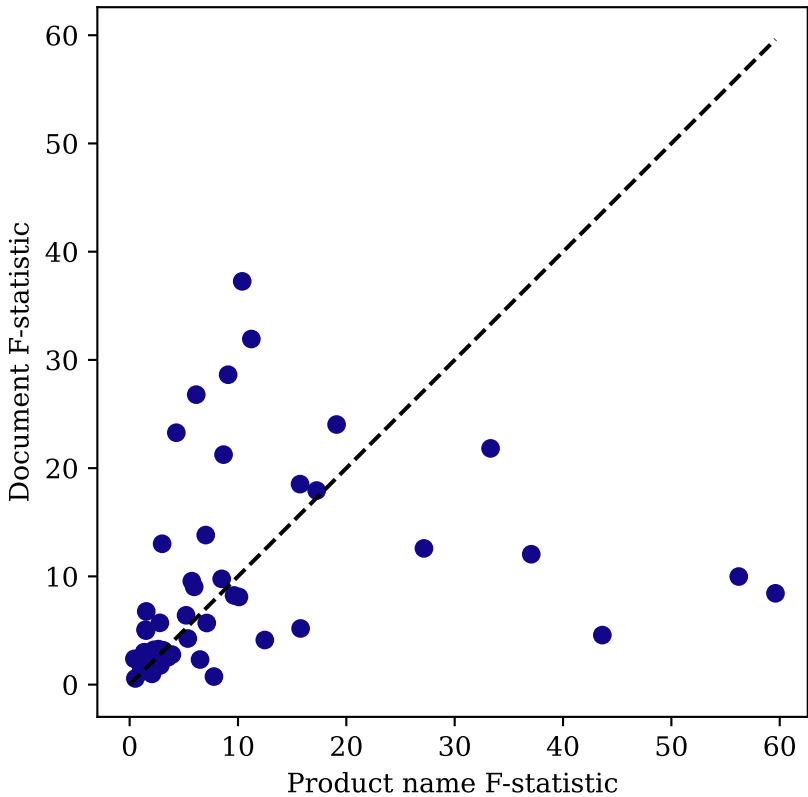

Supplement: software [file 2024.emnlp-main.534.software.zip]

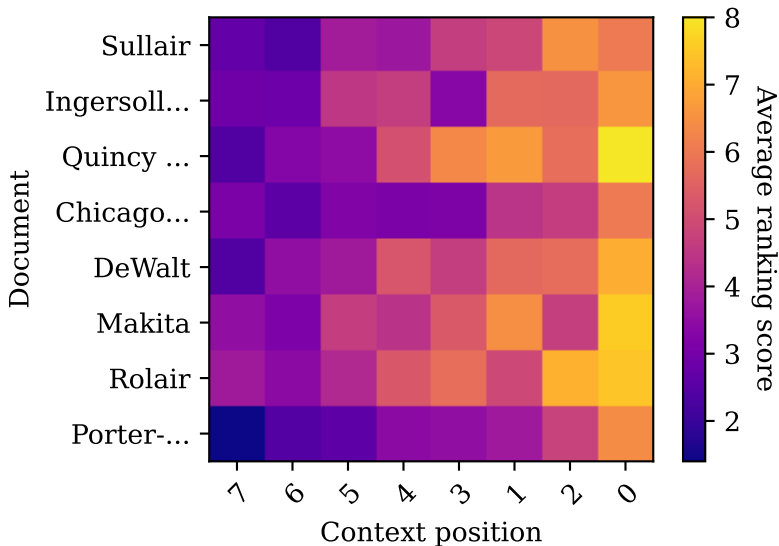

Supplement: software [file 2024.emnlp-main.534.software.zip]

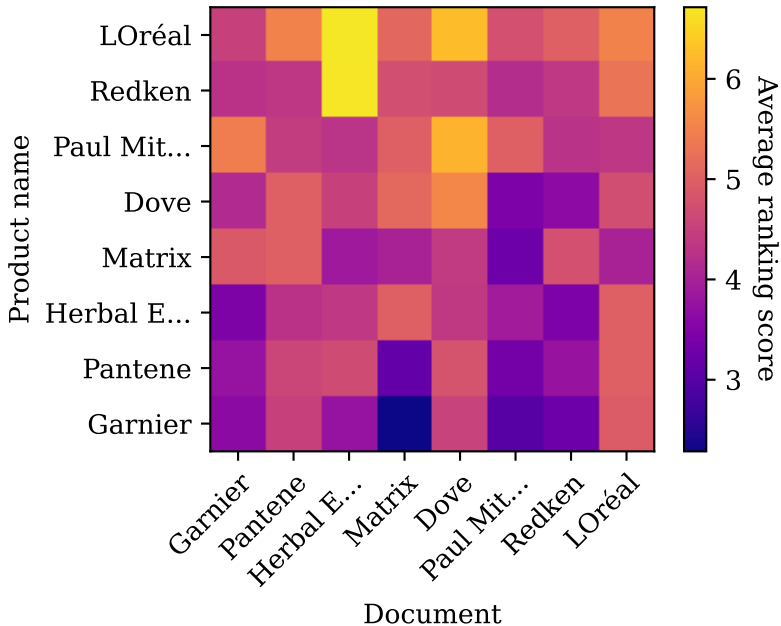

Supplement: software [file 2024.emnlp-main.534.software.zip]

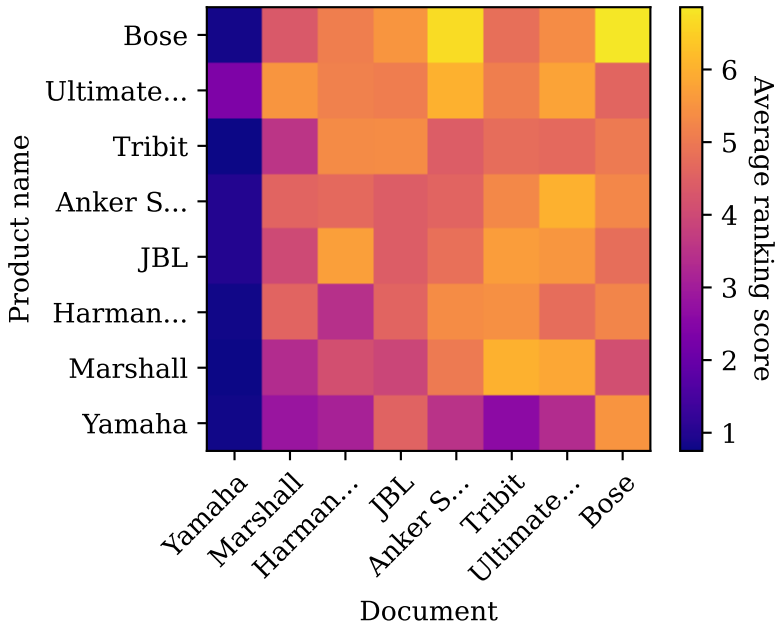

Supplement: software [file 2024.emnlp-main.534.software.zip]
